# Supplementary material for: Antibiotic prescriptions for inpatients having non-bacterial diagnosis at medicine departments of two private sector hospitals in Madhya Pradesh, India: a cross-sectional study
Source: PubMed Central journal article supplement — BMJ Open. 2017 Apr 8;7(4):e012974. doi: 10.1136/bmjopen-2016-012974 (PMC5775474; doi:10.1136/bmjopen-2016-012974), 2017-04-08
Supplement: bmjopen-2016-012974.draft_revisions.pdf [file bmjopen-2016-012974.draft_revisions.pdf]

# BMJ Open

## Antibiotic prescriptions to the inpatients having non-bacterial diagnosis at medicine departments of two private sector hospitals in Madhya Pradesh, India: a cross sectional study

|                                 |                                                                                                                                                                                                                                                                                                                                                                             |
|---------------------------------|-----------------------------------------------------------------------------------------------------------------------------------------------------------------------------------------------------------------------------------------------------------------------------------------------------------------------------------------------------------------------------|
| Journal:                        | <i>BMJ Open</i>                                                                                                                                                                                                                                                                                                                                                             |
| Manuscript ID                   | bmjopen-2016-012974                                                                                                                                                                                                                                                                                                                                                         |
| Article Type:                   | Research                                                                                                                                                                                                                                                                                                                                                                    |
| Date Submitted by the Author:   | 07-Jun-2016                                                                                                                                                                                                                                                                                                                                                                 |
| Complete List of Authors:       | Landstedt , Kristoffer; Karolinska Institutet, Public Health Sciences<br>Lundborg, Cecilia; Karolinska Institutet, Stockholm, Sweden<br>Sharma, Ashish; R. D. Gardi Medical College, Medicine<br>Johansson, Fredrik; Karolinska Institutet, Stockholm, Sweden<br>Sharma, Megha; R. D. Gardi Medical College, Pharmacology; Karolinska<br>Institutet, Public Health Sciences |
| <b>Primary Subject Heading</b>: | Public health                                                                                                                                                                                                                                                                                                                                                               |
| Secondary Subject Heading:      | Epidemiology, Global health, Infectious diseases, Public health, Health services research                                                                                                                                                                                                                                                                                   |
| Keywords:                       | Antibiotics, Private sector hospitals, Medicine department, Inpatients, India, Non-Bacterial infections                                                                                                                                                                                                                                                                     |
|                                 |                                                                                                                                                                                                                                                                                                                                                                             |

SCHOLARONE™  
Manuscripts

Only

1  
2  
3 **Antibiotic prescriptions to the inpatients having non-bacterial diagnosis at medicine**  
4 **departments of two private sector hospitals in Madhya Pradesh, India: a cross sectional**  
5 **study**  
6

7 **Authors list:**

8 Kristoffer Landstedt<sup>1</sup>, Cecilia StålsbyLundborg<sup>1</sup>, Ashish Sharma<sup>2</sup>, Fredrik Johansson<sup>1</sup>, Megha  
9 Sharma<sup>1, 3§</sup>  
10

11 <sup>1</sup> Public Health Sciences, Global Health, Karolinska Institutet, Tomtebodavägen 18A, 17177  
12 Stockholm, Sweden

13 <sup>2</sup>Department of Medicine, Ruxmaniben Deepchand Gardi Medical College, Ujjain, India

14 <sup>3</sup> Department of Pharmacology, Ruxmaniben Deepchand Gardi Medical College, Ujjain, India  
15  
16  
17  
18  
19  
20

21 §Corresponding author: Megha Sharma

22 Department of Pharmacology, Ruxmaniben Deepchand Gardi Medical College, Ujjain, India,  
23  
24

25 Mobile: +91-98273-61961, Office- +91-7368-261288  
26  
27  
28  
29  
30  
31  
32  
33  
34  
35  
36  
37  
38  
39

40 **Keywords:** Antibiotics, Non-bacterial infections, Inpatients, Medicine department, Private  
41 sector hospitals, India  
42  
43  
44  
45  
46  
47  
48  
49  
50  
51  
52  
53  
54  
55  
56  
57  
58  
59  
60

61 **Email addresses:**

62 Kristoffer L: Landstedt\_N@hotmail.com

63 CSL: cecilia.stalsby.lundborg@ki.se

64 AS: ashishricha2001@yahoo.co.in

65 FJ: fredrik.johansson@stud.ki.se

66 MS: meghasharma27@rediffmail.com

## Abstract

**Objectives:** To present and compare antibiotic prescribing among inpatients among most common non-bacterial diagnoses group at medicine departments of a teaching (TH) and a non-teaching hospital (NTH) in Central India.

**Setting:** An observational cross-sectional study was conducted at two tertiary care settings at Ujjain district, Madhya Pradesh, India.

**Participants:** The data was collected manually, using a customized form. All inpatients, who stayed at-least for one night in either of the hospitals during 2008-2011, with complete records were included.

**Outcome measures:** Inpatients were grouped based on the presence or absence of a bacterial infectious diagnosis along with viral or malaria fever or cardiovascular diseases. Classes of antibiotics prescribed to these groups, and adherence to the available prescribing guidelines were compared between the hospitals using WHO anatomical therapeutic chemical classification and International Classification of Diseases-10.

**Results:** Of total 20303 inpatients included in the study, 66% were prescribed antibiotics. Trade name prescribing and use of broad spectrum antibiotics were more frequent at the NTH compared to the TH ( $p<0.001$ ). At the TH, significantly higher proportion of patients in 'fever without registered bacterial infection' group; were prescribed antibiotics (82%) compared with the NTH (71%,  $p<0.001$ ). Patients admitted with 'cardiovascular diagnosis without bacterial infections' received antibiotics prescriptions at both hospitals; (NTH- 47% and TH- 37%) which was significantly higher at the NTH ( $p<0.001$ ).

**Conclusions:** Antibiotic prescribing to the inpatients without bacterial infections i.e. viral fever, malaria and cardiovascular diseases and use of broad spectrum antibiotics for non-indicated episodes were common at both hospitals. Treatment of non-bacterial infections with

1  
2  
3 antibiotics might be a potential risk for the development of bacterial resistance, a global  
4  
5 public health threat. Taking account of unnecessary prescribing in the hospitals, development  
6  
7 and implementation of local prescribing guidelines, followed by prescription analysis with  
8  
9 antibiotic stewardship programs are the main recommendations for the settings.  
10  
11  
12  
13  
14  
15  
16  
17  
18  
19  
20  
21  
22  
23  
24  
25  
26  
27  
28  
29  
30  
31  
32  
33  
34  
35  
36  
37  
38  
39  
40  
41  
42  
43  
44  
45  
46  
47  
48  
49  
50  
51  
52  
53  
54  
55  
56  
57  
58  
59  
60

For peer review only

### Strengths and limitations

- Prospective study over a long time period of three years and inclusion of all patients, irrespective to their age and sex strengthens the representativeness of the results.
- Data collecting tools were same at both study locations and the staff who collected the data was trained by the same person at both locations to minimize the variances.
- An observational non-interventional study design would have minimized the steering effect to the prescribers.
- Some data may have been lost in translation from analogue to digital records however large number of patients included in the study is likely to minimize the effect.
- The grouping of diagnoses might have produced false low antibiotic prescribing, specifically in suspected bacterial diagnosis groups however, in absence of confirmed etiology this was indispensable.

## BACKGROUND

Increasing morbidity and mortality due to infectious diseases, despite of the availability of the lifesaving antibiotics is an alarming situation, globally,[1]. These incidences of mortalities due to infections are higher in low- and middle-income countries than in high-income countries,[2–4]. WHO has reported a high burden of communicable diseases in India, and infections are responsible for 28% of the total mortality in the country,[5, 6]. Additionally, antibiotic resistance in India is reported to be high. However, figures cannot be generalized to all Indian settings as the bacterial resistance patterns widely vary between its regions and settings,[7].

Irrational (both over- and under-) use of antibacterials, is of global concern. It results in unnecessary treatment costs, is a potential risk for the development of antibiotic resistance and side effects such as antibiotic associated diarrhoea caused by *C. Difficile* or gastroenteritis,[8]. According to a report, the global consumption of antibiotics increased by 36% between 2000 and 2010 of which five countries including India (Brazil, Russia, India, China and South Africa) accounted for 76% of this increase,[9]. Despite of the paucity of studies that describe antibiotic prescribing from India, Van Boeckel et al presented India on the top of the list of antibiotic consumption with  $12.9 \times 10^9$  units in 2010 where one unit indicates a pill, capsule or ampoule,[1,9]. However, this increase might also have meant that segments of the population that previously had no access to antibiotics can now access antibiotics yet it cannot be disregarded that antibiotic resistance is a sequel of antibiotic use,[10].

It is thus imperative to map the prescribing patterns of antibiotics on a local level to address the potential need of improvement and to counter the consequences of inappropriate prescription of antibiotics. Indian private sector facilities are the major healthcare providers but are usually not included in these base line surveys,[11,12].

## OBJECTIVES

The study was conducted to present, analyse and compare antibiotic prescribing to the inpatients enrolled for most common non-bacterial diagnoses at the medicine departments of a teaching (TH) and a non-teaching hospital (NTH) in Central India.

## METHODS

### Study design

A cross sectional observational design was selected to conduct the study.

### Setting

The study was conducted at the medicine departments of two tertiary care hospitals from private sector in Ujjain district, India. The hospitals are addressed as teaching hospital (TH) and non-teaching hospital (NTH). Both hospitals are run by the same trust. The TH is located in a rural area of Ujjain district and had 570 beds at the time of the study. The NTH is located in the central part of Ujjain city and had 350 beds at the time of the study. The TH provides medical services including medical treatment and free of charge medicines to all patients while the NTH charges for the medical facilities on a 'no profit-no loss' basis. Patients from the NTH have to buy prescribed medicines from pharmacies inside or outside of the hospital. The physicians at the TH are salary paid and do not have any direct exposure with the sales representatives of pharmaceutical companies. Furthermore, the management at the TH is responsible for the purchase and supply of the drugs. Essential medicine list was available at the TH but was not implemented during the study period while prescribing guidelines were not present in any of the hospitals. Almost all physicians practicing at the NTH also had private practice and could be contacted by the representatives of pharmaceutical companies easily. The payments of the physicians at the NTH increase above par according to the number of patients they admit in the hospital and the number of visits made to the inpatients.

1  
2  
3 A well-equipped microbiology laboratory was present to process the samples free of cost for  
4  
5 all from the TH and with nominal charges from the NTH.  
6  
7

## 8 **Participants**

### 9 **Inclusion and exclusion criteria**

10  
11  
12 Patients who stayed for at least one night at medicine departments of either of the two  
13  
14 hospitals were considered as inpatients and included in the study. Patients who had  
15  
16 incomplete records or admitted to the medical intensive care units within the medicine  
17  
18 departments were not included in the analysis. Treatment recommendations including dose  
19  
20 and frequency varies for the patients under 15 years of age and the DDD measurement is not  
21  
22 applicable to them, thus were also excluded,[14].  
23  
24

### 25 **Variables**

26  
27  
28 The patient information was analysed for age, sex, diagnosis, duration of hospitals stay, if  
29  
30 they received antibiotic treatment, and duration of antibiotic treatment. The prescriptions were  
31  
32 analysed for the type of antibiotics prescribed, its dose, and frequency. The antibiotics were  
33  
34 classified according to the Anatomical Therapeutic Chemical (ATC) classification given by  
35  
36 the WHO Collaborating Centre for Drug Statistics Methodology (WHOCC),[13]. Defined  
37  
38 Daily Doses (DDD) were calculated for all prescribed antibiotics,[13]. DDD is a technical  
39  
40 unit for comparative purposes and is the average daily dose of the specific drug for its main  
41  
42 indication in adults,[14]. Fixed dose combinations of antibiotics (FDCs) that did not have an  
43  
44 ATC code assigned by WHOCC were assigned the code 'J01RA\*' according to Sharma et  
45  
46 al,[15]. FDCs that did not have a DDD were assigned one by examining the constituents and  
47  
48 the proportions in which they were found in one unit dose. DDD was then calculated on the  
49  
50 basis of number of units and converted to dose in gram.  
51  
52  
53  
54  
55  
56  
57  
58  
59  
60



1  
2  
3 The NLEMI is based on the WHO list of essential medicines (WHOLEM) and adapted to the  
4 disease panorama of India,[16]. These lists serve as guidelines to promote the prescribing of  
5 safe, cheap and effective drugs to the population,[16, 17]. Adherence to these lists was  
6 evaluated for all prescriptions.  
7  
8  
9  
10

### 11 **Data sources and considerations**

12  
13  
14  
15 The data collection process is described in detail earlier,[11, 12]. In brief, the data was  
16 collected prospectively between April 1<sup>st</sup>, 2008 and March 31<sup>st</sup>, 2011, for all patients admitted  
17 to the medicine departments at the TH and the NTH. This would have minimized the chances  
18 of any selection bias. The data was collected manually by the nurses on a specially designed  
19 form which was attached to the patient's file. The nurses and new recruits were trained  
20 regularly for the data collection by the last author.  
21  
22  
23  
24  
25  
26  
27

28  
29 Inpatients were categorized based on registered diagnoses in the patient file, using the  
30 'International Classification of Diseases' (ICD-10). The patients could have multiple  
31 registered diagnoses. Following the aim of the study, best possible efforts were done to  
32 distinguish the patients who had any indications for secondary antibiotic prophylaxis from  
33 those who did not,[18, 19, 20]. To obtain a better overview of the diseases the patients were  
34 categorized into 3 main groups; (a) cardiovascular, (b) non-infectious fevers and (c) other  
35 diagnoses. The group (c) included patients having either indicated or confirmed bacterial  
36 infections; 75% of all patients in the NTH and 67% in the TH. The groups (a) and (b) with  
37 non-infectious diseases were purposefully selected for detail study (Figure 1).  
38  
39  
40  
41  
42  
43  
44  
45  
46  
47  
48  
49

### 50 **Figure 1. The process of selection and grouping of inpatients admitted in medicine departments** 51 **of the TH and the NTH based on their diagnosis.**

52  
53 In order to identify and analyse the patients without any suspected bacterial infection as per  
54 the aim, these groups were further divided into four sub-groups as presented in Figure 1. The  
55 cardiovascular group was divided in two sub-groups; sub-group 1: 'cardiovascular diseases  
56  
57  
58  
59  
60

1  
2  
3 with no registered bacterial infection', sub-group 2: 'cardiovascular diseases with suspected  
4 bacterial infection'. Similarly, the non-infectious fever group was divided as sub-group 3:  
5 'malaria or viral fever with no registered bacterial infection' and sub-group 4: 'malaria or viral  
6 fever with suspected bacterial infection' (Figure 1).  
7  
8  
9

10  
11  
12 All cases of chronic obstructive pulmonary disease (COPD) were included in the bacterial  
13 infection groups since the aetiology of disease was seldom specified but these patients should  
14 receive less restricted antibiotic treatment. All patients with rheumatic heart disease (RHD)  
15 were categorized among patients with suspected bacterial infection, since the WHO  
16 guidelines for secondary prevention after rheumatic fever sets the duration of preventive  
17 antibiotic treatment from five years up to life-long, depending on a number of factors e.g.  
18 Time since last episode of rheumatic fever and severity of valve engagement,[19]. It also  
19 supports an individual assessment in every patient case. An antibiotic prescribed for a day  
20 was considered as one prescribing occasion and prescribed DDDs were calculated per 1000  
21 patients for the four sub-groups. According to WHOCC, oral metronidazole (P01AB01) is  
22 coded as an antiprotozoal drug, but in the National List of Essential Medicines of India  
23 (NLEMI) oral metronidazole is coded as an antibacterial drug and was therefore considered as  
24 an antibacterial in this study,[16].  
25  
26  
27  
28  
29  
30  
31  
32  
33  
34  
35  
36  
37  
38  
39  
40  
41

#### 42 **Ethics statement**

43  
44 Being an observational study, the data collection did not interfere with the treatment or caused  
45 any extra risks for the patients. Moreover, the names of the prescribers were not recorded to  
46 rule out the effect of being observed. All patients were assigned a unique code during the data  
47 entry to maintain anonymity of the inpatients. This unique code was used to compare details  
48 of patient information and antibiotic prescriptions for the analysis. The ethics committee of  
49 Ruxmaniben Deepchand Gardi Medical College, Ujjain, approved the study with approval  
50 number: 41/2007.  
51  
52  
53  
54  
55  
56  
57  
58  
59  
60

## Statistical Methods

All frequency and percentage of categorical values were calculated. Sum, median, mean, range and standard deviation were calculated for continuous numerical values. Values were rounded off to the closest whole number for percentage, prescription tables and in the text. The independent t-test was used for comparison of normal distributed and continuous variables. The chi-square test was used for comparison of categorical values. Fischer's exact test was used for expected <0.05 and Pearson chi-square test was used for expected values >0.05. Bonferroni's correction for multiple comparisons was used and p-values <0.001 were chosen for significance level to minimize the risks of type one errors. The data were analysed with Excel, SPSS version 22 (SPSS Inc., Chicago, IL, USA) and STATA version 13.1 (Stata Corp, College station, TX, USA).

## RESULTS

During the study period, totally 21558 patients were admitted in the two medicine departments, 7177 patients were admitted in the TH and 14381 in the NTH (Figure 1). As per the inclusion criteria, 20303 (94%) patients qualified as inpatients (6961 in the TH and 13342 in the NTH) and were included for further analysis.

In the TH 4540/6961 inpatients (65%) and in the NTH, 8900/13342 inpatients (67%) were prescribed antibiotics. An average of eight prescribing occasions were found per patient at the TH whereas in the NTH five antibiotic prescriptions were found per patient. Overall significantly higher proportion of the antibiotics prescribed in the TH adhered to the NLEMI; 77% prescriptions (27649/35732) than in the NTH; 60% (24683/41068,  $p < 0.001$ ).

Seven percent of all antibiotic prescriptions were made by using generic names in the TH which was significantly higher compared with the NTH (2%,  $p < 0.001$ ). At the TH, trade names; 'Cipro', 'Doxy', Genta' and 'Metrogyl' were used as local abbreviations for ciprofloxacin, doxycycline, gentamycin and metronidazole respectively. Longer duration of

1  
2  
3 stay and longer duration of antibiotic treatment was observed at the TH (mean days; 6 and 6  
4  
5 respectively) compared to the NTH (mean days; 3 and 4 respectively,  $p<0.001$ ).  
6  
7

### 8 **Distribution of inpatients in diagnosis groups and antibiotic prescription patterns**

9  
10 The most common diagnoses differed at the two hospitals. At department level in the TH,  
11 chronic obstructive pulmonary disease (COPD) (10%), viral fever (7%) and hypertension  
12 (5%) were more common and at the NTH; viral fever (10%), malaria (6%) and COPD (5%,  
13 Table 1). Among the non-infectious diagnoses group; cardiovascular (ICD-10 codes  
14 beginning with 'I') accounted for 48% of the group at the TH and 30% at the NTH. In the  
15 fever group, malaria was significantly more common at the NTH (74% patients) and viral  
16 infection was significantly more common at the TH (66% patients,  $p<0.001$ ). Totally at the  
17 NTH broad-spectrum antibiotics such as third-generation cephalosporins (J01DD) and FDCs  
18 (J01RA\*) comprised 52% of prescribing occasions of which FDCs accounted for 23% of  
19 occasions. At the TH these classes accounted for 13% of the total prescribing occasions with  
20 FDCs<1%. Demographic details and class wise distribution of prescribed antibiotic among all  
21 selected diagnoses groups of patients is presented in Table 2 and 3 respectively.  
22  
23  
24  
25  
26  
27  
28  
29  
30  
31  
32  
33  
34  
35  
36  
37

38 At the NTH, cephalosporin (J01D) was the most commonly prescribed class in the  
39 cardiovascular group (>35%), where third-generation cephalosporins (J01DD) constituted a  
40 major part of it (>30%) followed by FDCs (>20%). Fluoroquinolones (J01M) was the most  
41 commonly prescribed antibiotic class in the TH in both cardiovascular and fever groups  
42 (>30%, and >40% respectively).  
43  
44  
45  
46  
47  
48  
49  
50  
51  
52  
53  
54  
55  
56  
57  
58  
59  
60

**Table 1: Diagnoses of the four groups of inpatients at medicine departments at one teaching and one non-teaching hospitals in Ujjain, India**

| Cardiovascular with no registered bacterial infection |             |             | Cardiovascular with suspected bacterial infection |            |            | Malaria or Viral Fever with no registered bacterial infection |            |             | Malaria or Viral Fever with suspected bacterial infection |           |           |
|-------------------------------------------------------|-------------|-------------|---------------------------------------------------|------------|------------|---------------------------------------------------------------|------------|-------------|-----------------------------------------------------------|-----------|-----------|
| Diagnosis group                                       | TH          | NTH         | Diagnosis group                                   | TH         | NTH        | Diagnosis group                                               | TH         | NTH         | Diagnosis group                                           | TH        | NTH       |
|                                                       | n(%)        | n(%)        |                                                   | n(%)       | n(%)       |                                                               | n(%)       | n(%)        |                                                           | n(%)      | n(%)      |
| <b>Total</b>                                          | <b>1068</b> | <b>1738</b> | <b>Total</b>                                      | <b>438</b> | <b>254</b> | <b>Total</b>                                                  | <b>693</b> | <b>1177</b> | <b>Total</b>                                              | <b>55</b> | <b>28</b> |
| Hypertension                                          | 328(31)     | 470(27)     | COPD                                              | 209(48)    | 77(30)     | <b>Malaria</b>                                                | 237(34)    | 872(74)     | COPD                                                      | 10(18)    | 5(18)     |
| Cerebro vascular accident                             | 126(12)     | 383(22)     | Rheumatic Heart Disease                           | 130(30)    | 102(40)    | Cerebral smalaria caused by P. Falciparum                     | 4(1)       | 11(1)       | Urinarytrac tinfection                                    | 5(9)      | 7(25)     |
| Acute Myocardial Infarction                           | 28(3)       | 202(12)     | Pulmonary Tuberculosis                            | 19(4)      | 18(7)      | Malaria caused by P. Falciparum UNS                           | 9(1)       | 9(1)        | Tyfoild fever                                             | 8(15)     | 2(7)      |
| Chronic Ischemic Heart Disease                        | 17(2)       | 189(11)     | Urinarytract infection                            | 17(4)      | 15(6)      | Malaria caused by P. Vivax UNS                                | 16(2)      | 61(5)       | Acute gastroenteritis                                     | 4(7)      | 6(21)     |
| Coronary Artery Disease                               | 98(9)       | 101(6)      | Acute Gastroenteritis                             | 14(3)      | 12(5)      | Malaria UNS                                                   | 208(30)    | 791(67)     | Disease of airways UNS                                    | 8(15)     | 0(0)      |
| Left Ventricle Failure                                | 44(4)       | 69(4)       | Lower airway infection UNS                        | 13(3)      | 0(0)       | <b>Viral fever</b>                                            | 456(66)    | 305(26)     | Disease of upper airways UNS                              | 7(13)     | 0(0)      |
| Congestive Heart Failure                              | 56(5)       | 39(2)       | Sepsis                                            | 0(0)       | 5(2)       |                                                               |            |             | Pulmonary Tuberculosis                                    | 4(7)      | 2(7)      |
| Dilated Cardiomyopathy                                | 79(7)       | 6(<1)       | HIV with infection                                | 8(2)       | 1(<1)      |                                                               |            |             | HIV with infection                                        | 2(4)      | 0(0)      |
| Unspecified Cardiomyopathy                            | 21(2)       | 54(3)       | Rheumatic Fever                                   | 1(<1)      | 4(2)       |                                                               |            |             | Rheumatic Heart Disease                                   | 2(4)      | 1(4)      |
| Multiple Valve Disease                                | 61(6)       | 7(<1)       | Endocarditis                                      | 0(0)       | 4(2)       |                                                               |            |             | Pelvic Inflammatory Disease                               | 2(4)      | 0(0)      |
| Angina Pectoris                                       | 10(1)       | 35(2)       | Pneumonia                                         | 1(<1)      | 4(2)       |                                                               |            |             | Pneumonia                                                 | 0(0)      | 1(4)      |
| Acute Ischemic Heart Disease                          | 31(3)       | 11(1)       | Others                                            | 26(6)      | 12(5)      |                                                               |            |             | Other diagnoses                                           | 3(5)      | 4(14)     |
| Deep Vein Thrombosis UNS                              | 13(1)       | 19(1)       |                                                   |            |            |                                                               |            |             |                                                           |           |           |
| Mitral Stenosis                                       | 21(2)       | 2(<1)       |                                                   |            |            |                                                               |            |             |                                                           |           |           |
| Hypertensive Heart Disease                            | 20(2)       | 1(<1)       |                                                   |            |            |                                                               |            |             |                                                           |           |           |
| Cardiac arrest                                        | 2(<1)       | 16(1)       |                                                   |            |            |                                                               |            |             |                                                           |           |           |
| Other                                                 | 113(11)     | 134(8)      |                                                   |            |            |                                                               |            |             |                                                           |           |           |

Abbreviations: n(%)- Number of patients (percentage in that diagnosis group), NTH-non-teaching hospital, TH-teaching hospital, COPD-chronic obstructive pulmonary disease, UNS-unspecified, P.-plasmodium, HIV-human immunodeficiency virus.

**Table 2: Demographic details and antibiotic prescribing information of the inpatients at medicine departments at one teaching and one non-teaching hospitals in Ujjain, India**

|                                           | Medicine Department |            |                  | Cardiovascular with no registered bacterial diagnosis |          |                  | Cardiovascular with suspected bacterial infection |          |                  | Malaria or Viral Fever with no registered bacterial diagnosis |          |                  | Malaria or Viral Fever with suspected bacterial infection |         |                    |
|-------------------------------------------|---------------------|------------|------------------|-------------------------------------------------------|----------|------------------|---------------------------------------------------|----------|------------------|---------------------------------------------------------------|----------|------------------|-----------------------------------------------------------|---------|--------------------|
|                                           | TH                  | NTH        | p-value          | TH                                                    | NTH      | p-value          | TH                                                | NTH      | p-value          | TH                                                            | NTH      | p-value          | TH                                                        | NTH     | p-value            |
| Inpatients; n                             | 6961                | 13342      |                  | 1068                                                  | 1738     |                  | 438                                               | 254      |                  | 693                                                           | 1177     |                  | 55                                                        | 28      |                    |
| Age; mean years (SD)                      | 45 (17)             | 43 (18)    | <b>&lt;0.001</b> | 53 (14)                                               | 55 (15)  | <b>&lt;0.001</b> | 49 (17)                                           | 51 (17)  | 0.222            | 36 (15)                                                       | 35 (16)  | 0.387            | 37 (14)                                                   | 40 (20) | 0.440              |
| Inpatients prescribed AB; n (%)           | 4540 (65)           | 8900 (67)  | 0.034            | 392 (37)                                              | 808 (47) | <b>&lt;0.001</b> | 299 (68)                                          | 179 (71) | 0.545            | 569 (82)                                                      | 831 (71) | <b>&lt;0.001</b> | 53 (96)                                                   | 21 (75) | 0.006 <sup>a</sup> |
| Duration of hospital stay; mean days (SD) | 6 (5)               | 3 (3)      | <b>&lt;0.001</b> | 6 (5)                                                 | 3 (3)    | <b>&lt;0.001</b> | 7 (5)                                             | 4 (3)    | <b>&lt;0.001</b> | 4 (4)                                                         | 3 (2)    | <b>&lt;0.001</b> | 5 (3)                                                     | 4(2)    | 0.796              |
| Duration of AB treatment; mean days (SD)  | 6 (4)               | 4 (2)      | <b>&lt;0.001</b> | 6 (4)                                                 | 4 (2)    | <b>&lt;0.001</b> | 7 (4)                                             | 4 (2)    | <b>&lt;0.001</b> | 5 (3)                                                         | 4 (2)    | <b>&lt;0.001</b> | 5 (2)                                                     | 5(2)    | 0.419              |
| Total AB prescription; n                  | 35732               | 41068      |                  | 2741                                                  | 3366     |                  | 2388                                              | 855      |                  | 3210                                                          | 3451     |                  | 316                                                       | 128     |                    |
| Prescriptions per patient                 | 7.8                 | 4.6        |                  | 7                                                     | 4        |                  | 8                                                 | 4.8      |                  | 5.6                                                           | 4.2      |                  | 6                                                         | 6.1     |                    |
| AB prescriptions by generic name; n (%)   | 2341 (7)            | 685 (2)    | <b>&lt;0.001</b> | 175 (6)                                               | 47 (1)   | <b>&lt;0.001</b> | 282 (12)                                          | 46 (5)   | <b>&lt;0.001</b> | 61 (2)                                                        | 52 (2)   | 0.214            | 19 (6)                                                    | 5 (4)   | 0.374 <sup>a</sup> |
| Prescriptions of AB found in NLEMI; n (%) | 27640 (77)          | 24683 (60) | <b>&lt;0.001</b> | -                                                     | -        | -                | -                                                 | -        | -                | -                                                             | -        | -                | -                                                         | -       | -                  |

Abbreviations: AB-antibiotics, NTH: non-teaching hospital, SD-standard deviation, TH: teaching hospital. Significant p-values are shown in bold. Independent sample t-test was used to compare age, duration of hospital stay and duration of antibiotic treatment. Pearson chi-square was used to compare prescription details with expected value >5. <sup>a</sup>Fischer's exact test was used to compare expected values <5.

**Table 3: Class wise distribution of prescribed antibiotics in four selected diagnoses groups at one teaching and one non-teaching hospitals in Ujjain, India**

| Name of AB; ATC-code                                          | Cardiovascular with no registered bacterial infection |           |                  | Cardiovascular with suspected bacterial infection |          |                  | Malaria or Viral with no registered bacterial infection |           |                  | Malaria or Viral Fever with suspected bacterial infection |         |                    |
|---------------------------------------------------------------|-------------------------------------------------------|-----------|------------------|---------------------------------------------------|----------|------------------|---------------------------------------------------------|-----------|------------------|-----------------------------------------------------------|---------|--------------------|
|                                                               | TH                                                    | NTH       | p-value          | TH                                                | NTH      | p-value          | TH                                                      | NTH       | p-value          | TH                                                        | NTH     | p-value            |
| Total prescriptions                                           | n (%)                                                 | n (%)     |                  | n (%)                                             | n (%)    |                  | n (%)                                                   | n (%)     |                  | n (%)                                                     | n (%)   |                    |
|                                                               | 2741                                                  | 3366      |                  | 2388                                              | 855      |                  | 3210                                                    | 3451      |                  | 316                                                       | 128     |                    |
| <b>Tetracyclines; J01A: J01AA</b>                             | 284 (10)                                              | 5 (0)     | <b>&lt;0.001</b> | 243 (10)                                          | 0 (0)    |                  | 553 (17)                                                | 75 (2)    | <b>&lt;0.001</b> | 83 (26)                                                   | 0 (0)   |                    |
| <b>Beta-lactam ABs, penicillin; J01C</b>                      | 458 (17)                                              | 498 (15)  | 0.041            | 622 (26)                                          | 184 (22) | 0.009            | 111 (3)                                                 | 245 (7)   | <b>&lt;0.001</b> | 12 (4)                                                    | 7 (5)   | 0.431              |
| Extended-spectrum penicillins; J01CA                          | 83 (3)                                                | 99 (3)    | 0.843            | 122 (5)                                           | 99 (12)  | <b>&lt;0.001</b> | 19 (1)                                                  | 51 (1)    | <b>&lt;0.001</b> | 0 (0)                                                     | 2 (2)   |                    |
| Combination of penicillin incl. Beta-lactamase AB; J01CR      | 373 (14)                                              | 399 (12)  | 0.040            | 500 (21)                                          | 85 (10)  | <b>&lt;0.001</b> | 92 (3)                                                  | 194 (6)   | <b>&lt;0.001</b> | 12 (4)                                                    | 5 (4)   | 1.0 <sup>a</sup>   |
| <b>Other Beta-lactam; J01D</b>                                | 488 (18)                                              | 1391 (41) | <b>&lt;0.001</b> | 353 (15)                                          | 304 (36) | <b>&lt;0.001</b> | 665 (21)                                                | 1792 (52) | <b>&lt;0.001</b> | 40 (13)                                                   | 39 (30) | <b>&lt;0.001</b>   |
| 1st gen. cephalosporins; J01DB                                | 7 (0)                                                 | 16 (1)    | 0.163            | 0 (0)                                             | 5 (1)    |                  | 0 (0)                                                   | 9 (0)     |                  | 0 (0)                                                     | 0 (0)   |                    |
| 2nd gen. cephalosporins; J01DC                                | 0 (0)                                                 | 98 (3)    |                  | 0 (0)                                             | 27 (3)   |                  | 0 (0)                                                   | 168 (5)   |                  | 0 (0)                                                     | 0 (0)   |                    |
| 3rd gen. cephalosporins; J01DD                                | 481 (18)                                              | 1254 (37) | <b>&lt;0.001</b> | 353 (15)                                          | 272 (32) | <b>&lt;0.001</b> | 665 (21)                                                | 1606 (47) | <b>&lt;0.001</b> | 40 (13)                                                   | 39 (30) | <b>&lt;0.001</b>   |
| 4th gen. cephalosporins; J01DH                                | 8 (0)                                                 | 23 (1)    | 0.032            | 0 (0)                                             | 0 (0)    |                  | 0 (0)                                                   | 9 (0)     |                  | 0 (0)                                                     | 0 (0)   |                    |
| <b>Sulfonamide with timethoprim; J01E: J01EE</b>              | 8 (0)                                                 | 0 (0)     |                  | 18 (1)                                            | 0 (0)    |                  | 8 (0)                                                   | 0 (0)     |                  | 0 (0)                                                     | 0 (0)   |                    |
| <b>Macrolides, lincosamides J01F</b>                          | 16 (1)                                                | 2 (0)     | <b>&lt;0.001</b> | 4 (0)                                             | 6 (1)    | 0.025*           | 15 (0)                                                  | 7 (0)     | 0.060            | 3 (1)                                                     | 4 (3)   | 0.110 <sup>a</sup> |
| Macrolides; J01FA                                             | 12 (0)                                                | 2         | 0.002            | 4 (0)                                             | 6 (1)    |                  | 15 (0)                                                  | 7 (0)     |                  | 3 (1)                                                     | 4 (3)   |                    |
| Lincosamides; J01FF                                           | 4 (0)                                                 | 0 (0)     |                  | 0 (0)                                             | 0 (0)    |                  | 0 (0)                                                   | 0 (0)     |                  | 0 (0)                                                     | 0 (0)   |                    |
| <b>Aminoglycoside; J01G: J01GB</b>                            | 78 (3)                                                | 73 (2)    | 0.090            | 149 (6)                                           | 46 (5)   | 0.364            | 17 (1)                                                  | 60 (2)    | <b>&lt;0.001</b> | 11 (3)                                                    | 9 (7)   | 0.102              |
| <b>Quinolones; J01M: J01MA</b>                                | 1031 (38)                                             | 301 (9)   | <b>&lt;0.001</b> | 731 (31)                                          | 112 (13) | <b>&lt;0.001</b> | 1526 (48)                                               | 464 (13)  | <b>&lt;0.001</b> | 126 (40)                                                  | 37 (29) | 0.030              |
| <b>Fixed dose combination of ABs; J01R: J01RA*</b>            | 12 (0)                                                | 929 (28)  | <b>&lt;0.001</b> | 31 (1)                                            | 170 (20) | <b>&lt;0.001</b> | 34 (1)                                                  | 669 (19)  | <b>&lt;0.001</b> | 6 (2)                                                     | 17 (13) | <b>&lt;0.01</b>    |
| <b>Other ABs; J01X</b>                                        | 167 (6)                                               | 176 (5)   | 0.145            | 132 (6)                                           | 30 (4)   | 0.020            | 149 (5)                                                 | 138 (4)   | 0.197            | 20 (6)                                                    | 15 (12) | 0.056              |
| Glycopeptide ABs; J01XA                                       | 15 (1)                                                | 176 (5)   | <b>&lt;0.001</b> | 0 (0)                                             | 0 (0)    |                  | 0 (0)                                                   | 0 (0)     |                  | 0 (0)                                                     | 0 (0)   |                    |
| Imidazole derivatives; J01XD                                  | 152 (6)                                               | 0 (0)     |                  | 132 (6)                                           | 30 (4)   | 0.020            | 149 (5)                                                 | 137 (4)   | 0.176            | 20 (6)                                                    | 15 (12) | 0.056              |
| Other ABs; J01XX                                              | 0 (0)                                                 | 0 (0)     |                  | 0 (0)                                             | 0 (0)    |                  | 0 (0)                                                   | 1 (0)     |                  | 0 (0)                                                     | 0 (0)   |                    |
| <b>Drugs for treatment of tuberculosis; J04A</b>              | 0 (0)                                                 | 0 (0)     |                  | 24 (1)                                            | 0 (0)    |                  | 0                                                       | 0 (0)     |                  | 0 (0)                                                     | 0 (0)   |                    |
| Antibiotics; J04AB (Treatment for Tuberculosis)               | 0 (0)                                                 | 0 (0)     |                  | 6 (0)                                             | 0 (0)    |                  | 0 (0)                                                   | 0 (0)     |                  | 0 (0)                                                     | 0 (0)   |                    |
| Hydrazides; J04AC                                             | 0 (0)                                                 | 0 (0)     |                  | 6 (0)                                             | 0 (0)    |                  | 0 (0)                                                   | 0 (0)     |                  | 0 (0)                                                     | 0 (0)   |                    |
| Other drugs for treatment of tuberculosis; J04AK              | 0 (0)                                                 | 0 (0)     |                  | 12 (1)                                            | 0 (0)    |                  | 0 (0)                                                   | 0 (0)     |                  | 0 (0)                                                     | 0 (0)   |                    |
| <b>Nitroimidazole derivatives; P01AB (Oral Metronidazole)</b> | 201 (7)                                               | 0 (0)     |                  | 81 (3)                                            | 3 (0)    | <b>&lt;0.001</b> | 132 (4)                                                 | 1 (0)     | <b>&lt;0.001</b> | 15 (5)                                                    | 0 (0)   |                    |

Abbreviations: : n(%)- Number of patients (percentage in antibiotic class),AB-antibiotics, ATC-WHO anatomic therapeutic chemical classification, NTH: non-teaching hospital, TH: teaching hospital. Significant p-values shown in bold. Pearson chi-square and <sup>a</sup>Fischer's exact test were used to compare antibiotic prescribing details, gen- generation.

1  
2  
3 Third-generation cephalosporins (J01DD) constituted 47% and 30% prescriptions among sub-  
4  
5 group 3 and 4 at the NTH, followed by FDCs in 19% and 29% prescriptions respectively.  
6  
7 Overall, antibiotic prescriptions were significantly more common among the patients in  
8  
9 'malaria or viral fever with no registered bacterial infections group' than in the 'cardiovascular  
10  
11 diseases with no registered bacterial infections' ( $p < 0.001$ ). None of the records from the four  
12  
13 sub-groups had requisition for sending samples for bacterial culture.  
14  
15

16  
17 The most frequently prescribed antibiotic substance measured in DDD/1000 patients at  
18  
19 department level of the TH was ciprofloxacin (J01MA02) and at the NTH was ceftriaxone  
20  
21 (J01DD04). DDDs calculated as DDD per 1000 patients in four sub-groups are described in  
22  
23 Table 4. Ciprofloxacin had highest prescribed DDDs/1000 patient followed by doxycycline  
24  
25 and ceftriaxone in both hospitals (Figure 2).  
26  
27  
28  
29  
30  
31  
32  
33  
34  
35  
36  
37  
38  
39  
40  
41  
42  
43  
44  
45  
46  
47  
48  
49  
50  
51  
52  
53  
54  
55  
56  
57  
58  
59  
60



**Table 4: Most commonly prescribed antibiotics among the selected diagnoses groups presenting the prescribing occasions in DDDs/1000 patients at sixth level of the ATC classification**

| Name; ATC-code                         | Cardiovascular with no registered bacterial infection n (%) |            | Cardiovascular with suspected bacterial infection n (%) |                          | Malaria or Viral Fever with no registered bacterial infection n (%) |                          | Malaria or Viral Fever with suspected bacterial infection n (%) |            |
|----------------------------------------|-------------------------------------------------------------|------------|---------------------------------------------------------|--------------------------|---------------------------------------------------------------------|--------------------------|-----------------------------------------------------------------|------------|
|                                        | TH                                                          | NTH        | TH                                                      | NTH                      | TH                                                                  | NTH                      | TH                                                              | NTH        |
| Total DDDs/1000 patients               | 2062 (99)                                                   | 1456 (100) | 4514 (99)                                               | 3421 (100 <sup>#</sup> ) | 4480 (100 <sup>#</sup> )                                            | 3048 (100 <sup>#</sup> ) | 5432 (100 <sup>#</sup> )                                        | 5827 (100) |
| Doxycycline, J01AA02                   | 491 (24)                                                    |            | 1030 (23)                                               |                          | 1463 (33)                                                           | 296 (10)                 | 2745 (51)                                                       |            |
| Ampicillin, J01CA01                    | 68 (3)                                                      |            | 170 (4)                                                 |                          |                                                                     |                          |                                                                 |            |
| Amoxicillin, J01CA04                   |                                                             | 81 (6)     |                                                         | 435 (13)                 |                                                                     |                          |                                                                 |            |
| Amoxicillin + Clavulanic acid, J01CR02 |                                                             |            |                                                         | 566 (17)                 |                                                                     | 88 (3)                   |                                                                 |            |
| Piperacillin + Tazobactam, J01CR05     |                                                             |            |                                                         |                          |                                                                     | 34 (1)                   |                                                                 |            |
| Ampicillin + Cloxacillin, J01CR50      | 217 (11)                                                    |            | 774 (17)                                                |                          |                                                                     |                          | 191 (4)                                                         |            |
| Cefuroxime, J01DC02                    |                                                             |            |                                                         | 95 (3)                   |                                                                     | 136 (4)                  |                                                                 |            |
| Cefprozil, J01DC10                     |                                                             | 75 (5)     |                                                         |                          |                                                                     |                          |                                                                 |            |
| Cefotaxime, J01DD01                    | 172 (8)                                                     | 46 (3)     | 298 (7)                                                 | 59 (2)                   | 199 (4)                                                             | 96 (3)                   | 295 (5)                                                         |            |
| Ceftriaxone, J01DD04                   | 133 (6)                                                     | 558 (38)   | 244 (5)                                                 | 907 (27)                 | 560 (13)                                                            | 1052 (35)                | 164 (3)                                                         | 1402 (24)  |
| Azithromycin, J01FA10                  |                                                             |            |                                                         |                          |                                                                     |                          |                                                                 | 476 (8)    |
| Gentamicin, J01GB03                    | 44 (2)                                                      |            | 167 (4)                                                 | 81 (2)                   |                                                                     |                          |                                                                 |            |
| Amikacin, J01GB06                      |                                                             |            |                                                         |                          |                                                                     |                          |                                                                 | 321 (6)    |
| Ofloxacin, J01MA01                     |                                                             |            |                                                         |                          |                                                                     | 202 (7)                  |                                                                 |            |
| Ciprofloxacin, J01MA02                 | 687 (33)                                                    | 141 (10)   | 1057 (23)                                               | 527 (15)                 | 1940 (43)                                                           | 602 (20)                 | 1185 (22)                                                       | 2886 (50)  |
| Norfloxacin, J01MA06                   |                                                             |            | 201 (4)                                                 |                          |                                                                     |                          | 273 (5)                                                         |            |
| Levofloxacin, J01MA12                  |                                                             | 73 (5)     | 202 (4)                                                 | 129 (4)                  |                                                                     |                          | 145 (3)                                                         |            |
| Cefoperazone + Sulbactam, J01RA*83     |                                                             | 92 (6)     |                                                         | 94 (3)                   |                                                                     | 90 (3)                   |                                                                 | 125 (2)    |
| Ceftriaxone + Sulbactam, J01RA*84      |                                                             | 228 (16)   |                                                         | 277 (8)                  |                                                                     | 199 (7)                  |                                                                 |            |
| Ceftriaxone + Tazobactam, J01RA*85     |                                                             | 162 (11)   |                                                         | 156 (5)                  |                                                                     | 162 (5)                  |                                                                 | 250 (4)    |
| Metronidazole, J01XD01                 | 139 (7)                                                     |            | 262 (6)                                                 | 95 (3)                   | 204 (5)                                                             | 91 (3)                   | 262 (5)                                                         | 367 (6)    |
| Metronidazole, P01AB01 (Oral)          | 111 (5)                                                     |            | 109 (2)                                                 |                          | 114 (3)                                                             |                          | 172 (3)                                                         |            |

Abbreviations: : n(%)- Number of patients (percentage), AB: antibiotics, DDD: Defined Daily Dose, NTH: non-teaching hospital, TH: teaching hospital, <sup>#</sup> rounding off the percentages to nearest integer made the total more than 100%

1  
2  
3 **Figure 2. Top 90% of prescription in the four selected groups measured in DDD/1000 patients,**  
4 **presented at fourth level of the ATC classification at one teaching and one non-teaching**  
5 **hospitals in Ujjain, India**  
6

## 7 **DISCUSSION**

8  
9 To our knowledge this is the first study that presented antibiotic prescription practices at  
10 medicine departments in Indian private sector hospitals focusing the non-bacterial infection  
11 diseases. This also leads to a limitation as the results of present study could not be compared  
12 with any other study thus the results were compared with most equivalent studies available.  
13  
14 Antibiotics were commonly prescribed to the inpatients at both study hospitals. Irrespective of  
15 the indications, broad-spectrum antibiotics and third-generation cephalosporins that are to be  
16 conserved for high risks co-morbidities and life-threatening bacterial infections were  
17 prescribed frequently. The study also highlights high rates of antibiotic prescriptions for the  
18 selected groups of non-bacterial infectious diseases such as cardiovascular disease, malaria  
19 and viral fever.  
20  
21

### 22 **Antibiotic prescription in the cardiovascular and fever groups**

23  
24 The average prescription rate at the medicine departments were higher (TH: 65% and NTH:  
25 67%,  $p < 0.001$ ) when compared with the rates at the medicine department of a Government  
26 hospital at Bathalapalli, (Andhra Pradesh) India (63%),[21]. Cardiovascular diseases are  
27 primarily non-infectious with a few exceptions such as rheumatic fever, endocarditis,  
28 pericarditis and myocarditis (bacterial or viral). COPD and RHD are the common associated  
29 diseases among the cardiovascular patients. Rheumatic fever is an immune response sequel to  
30 an infection and may cause endocarditis,[19, 22]. Pericarditis and myocarditis are however  
31 most commonly developed from viral pathogens where antibiotic treatment is not  
32 recommended routinely,[23, 24].  
33  
34

35  
36 Interestingly, more than 35% of inpatients among 'cardiovascular group with no registered  
37 bacterial infection' were prescribed antibiotics in both hospitals. As per the treatment  
38  
39  
40  
41  
42  
43  
44  
45  
46  
47  
48  
49  
50  
51  
52  
53  
54  
55  
56  
57  
58  
59  
60

1  
2  
3 guidelines and recommendations, only the patients who have confirmed infectious diagnosis  
4  
5 are expected to receive an antibiotic prescription,[15, 16]. Therefore, the practice of  
6  
7 prescribing antibiotics in absence of indications among the cardiovascular patients could be  
8  
9 termed as unnecessary. Among the COPD and RHD patients the aetiology of current episode  
10  
11 of hospitalization could be potentially expected to be non-bacterial e.g. viral infection.  
12  
13 Although could not be confirmed due to unclear patients' records, but prescribing antibiotics  
14  
15 to 35% cases in the group could not be justified.  
16  
17

18  
19 FDCs were prescribed at higher extent to the cardiovascular patients at the NTH than at the  
20  
21 TH. Rationality of the newer FDCs coded with ATC-code: J01RA\* is not established yet and  
22  
23 these combinations are neither listed in the NLEMI nor in the WHOLEM,[16, 17]. It is also  
24  
25 evident that the constituents of these combinations are often present in smaller quantities than  
26  
27 recommended which might lead to incept the development of antibiotic resistance,[25].  
28  
29

30  
31 The sub-group 'malaria or viral fever with suspected bacterial infection' presented highest rate  
32  
33 of antibiotic prescriptions among all four sub-groups (TH: 96%, NTH 75%). Our result also  
34  
35 highlights that fever was perceived higher risk for the inpatients to receive antibiotic  
36  
37 prescriptions, than having cardiovascular diseases. Fever is a common symptom among  
38  
39 malaria, viral fever and bacterial infection. Therefore, the doctors might have prescribed  
40  
41 antibiotics as a 'prophylactic' treatment to treat bacterial infection, if any. The result was  
42  
43 higher yet comparable with a study at primary and secondary health care settings in Uttar  
44  
45 Pradesh, India. That study showed that 85% of the fever patients were prescribed  
46  
47 antibiotics,[26]. Additionally, in our study high percentage of patients with fever (malaria and  
48  
49 viral fever) with 'no registered bacterial infection' were prescribed antibiotics (TH: 82%,  
50  
51 NTH: 71%). An out-patient study from Uganda, a malaria endemic country, showed that 42%  
52  
53 malaria patients were prescribed antibiotics without any registered indication,[27]. Although  
54  
55 majority of the prescriptions in the study were empirical thus the rationality of the  
56  
57  
58  
59  
60

1  
2  
3 prescriptions cannot be evaluated. However, prescribing antibiotics to non-bacterial infections  
4  
5 is termed as irrational practice and need an imperative attention.  
6  
7

### 8 **Adherence to the essential medicine lists and prescriptions by generic name**

9

10 According to WHO, prescribing by generic name is part of rational prescribing and the drug  
11 policy applicable for both public and private Indian healthcare settings. Prescribing and  
12 purchasing by generic name is cost effective and provide flexibility to buy the available  
13 medicine of any company. However, the presumed adherence is higher at public hospitals,  
14 followed at 'private non-profit' hospitals and lastly at the 'private for-profit' hospitals,[11, 12,  
15 28]. In present study, antibiotic prescriptions made by generic names among the patients of  
16 cardiovascular diseases with no registered bacterial infection (TH: 6%, NTH: 1%  $p<0.001$ )  
17 and with suspected bacterial infection (TH: 12% NTH: 5%  $p<0.001$ ) were significantly lower  
18 at the NTH than at the TH. Third-generation cephalosporins (J01D, 29%) and FDCs (J01RA\*,  
19 23%) were most commonly prescribed classes at the NTH while quinolones were most  
20 commonly prescribed at the TH during the study period (J01M, 37%, NTH: 13%). Previous  
21 studies from Uttar Pradesh and Madhya Pradesh, India have also shown similar results for  
22 academic and non-academic hospitals,[11, 12, 15]. High prescribing of these classes are  
23 further supported by Van Boeckel et al, they observed a huge increase in the consumption of  
24 fluoroquinolones and cephalosporins all over the globe over past decade. This increase was  
25 mainly contributed by the rates of India and China,[9]. At the NTH prescriptions of FDCs  
26 varied between 19 and 28% among the selected sub-groups (TH:  $<2\%$ ) and the prescriptions  
27 of third-generation cephalosporins varied between 30 and 47% (TH:  $<22\%$ ). According to the  
28 WHO, prescription of multiple drugs when not indicated, prescribed in inadequate doses  
29 (often constituted in smaller quantity than recommended) and prescription of drugs that are  
30 not in accordance to the local or national clinical guidelines are all examples of actions  
31 deemed inappropriate,[29]. All these traits may be true for the prescriptions of the newer  
32  
33  
34  
35  
36  
37  
38  
39  
40  
41  
42  
43  
44  
45  
46  
47  
48  
49  
50  
51  
52  
53  
54  
55  
56  
57  
58  
59  
60

1  
2  
3 FDCs (J01RA\*) in present study, both study hospitals are from private sector and are  
4 regulated by the same trust on 'not for-profit' basis. The differences in the prescribing  
5 practices might be an influence of the fact that academic hospitals are a part of the educational  
6 process and regular educational activities conducted at these hospitals reflects in better  
7 adherence to the guidelines, as presented at the TH. Another reason for frequent prescribing  
8 of broad-spectrum antibiotics, new FDCs and use of trade names at the NTH could be  
9 explained by the results of a review by Blumenthal et al,[30]. The review concluded that  
10 physicians who had received gifts or money from the pharmaceutical companies were more  
11 likely to prescribe drugs produced by the company and less prone to use generic names. The  
12 pressure from pharmaceutical companies could be anticipated on the doctors at the NTH, due  
13 to unrestricted visits of pharmaceutical company representatives. Moreover, these new FDCs  
14 of antibiotics are more expensive than regular and generic formulations and generate extra  
15 earnings to the doctors. The restriction of these visits and the management control over the  
16 purchase and supply of medicines could be seen as main reasons for low FDCs prescribing  
17 and high use of generic names at the TH. Interestingly trade names were used as local  
18 abbreviations for the four antibiotics namely ciprofloxacin, doxycycline, gentamycin and  
19 metronidazole at the TH as discussed in method section. Only generic drugs were purchased  
20 and dispensed at the TH due to administrative control over purchase and supply of the drugs.  
21 Thus even if these antibiotics were prescribed by an abbreviation similar to the trade names  
22 these were included in adherence to generic name prescribing.

### 47 **Duration of stay and duration of antibiotic treatment**

48  
49  
50 In present study both duration of stay and duration of antibiotic treatment were longer at the  
51 TH compared to the NTH among all inpatients groups. This could be explained by the fact  
52 that the charges of healthcare and drugs were supplied free at the TH, making the stay  
53 economically feasible at the TH than at the NTH where they had to pay for all services and  
54  
55  
56  
57  
58  
59  
60

1  
2  
3 medicines. This association of longer duration of stay and antibiotic treatment at TH has also  
4  
5 been observed in previous studies from India,[11, 15, 31]. However, it is evident that the  
6  
7 treatment given for both shorter or longer time period than recommended, is irrational and  
8  
9 substantially contributes to the development of antibiotic resistance,[1, 29].

### 11 **GENERALISABILITY**

12  
13  
14 The data collection method is robust and reliable. The data collection method and tool could  
15  
16 easily be adapted at other tertiary care hospitals that lack computerized patient records to suit  
17  
18 the needs of the hospitals. Recruitment of the nursing staff routinely working in the  
19  
20 department, for manual data collection would have helped to minimize the influence of study  
21  
22 on the prescribers. High prescribing rates of antibiotics and use of FDCs among inpatients in  
23  
24 these settings could broadly be considered as representative for similar health care settings in  
25  
26 low-middle income countries.  
27  
28  
29

### 31 **CONCLUSION**

32  
33 At the TH, higher percentage of prescribing occasions adhered to the guidelines than at the  
34  
35 NTH, however, the overall adherence was low. Fever was a risk factor to receive antibiotic  
36  
37 prescription at both hospitals. Patients with non-bacterial infections such as malaria or viral  
38  
39 fever or cardiovascular diseases were prescribed antibiotics at both medicine departments  
40  
41 which could not be justified. Broad spectrum antibiotics with irrational combinations of  
42  
43 antibiotics were commonly prescribed in the study hospitals in non-indicated conditions.  
44  
45  
46

### 48 **FUTURE IMPLICATIONS**

49  
50 Development and implementation of local diagnosis specific prescribing guidelines along  
51  
52 with continuous follow-up of prescriptions under antibiotic stewardship programs is needed  
53  
54 for the settings. The results from the TH indicate a promising effect of management control to  
55  
56 minimise antibiotic prescribing, for better adherence to the NLEMI and use of generic names  
57  
58  
59  
60

1  
2  
3 compared to the NTH and could be tested in other settings. Improving hygiene is another  
4  
5 recommendation for prevention of infections and to decrease the 'prophylactic' use of  
6  
7 antibiotics. Lack of 'culture of sending cultures' is another concern at the settings. Motivating  
8  
9 the physicians of both settings to send cultures before prescribing antibiotics is also  
10  
11 suggested.  
12

### 13 14 **CONTRIBUTERSHIP STATEMENT**

15  
16  
17 MS and CSL designed, visualized the research question and developed the data collection  
18  
19 tool. MS conducted repeated training sessions for nursing personal for recording the data. MS  
20  
21 was also responsible for coordination with the nursing staff, monitoring and supervision of the  
22  
23 data collection and entry. CSL participated in planning the study design and the coordination  
24  
25 of the study. KL, CSL and MS participated in the conception and design of the present study  
26  
27 and revising the paper critically for substantial intellectual content. KL grouped and analyzed  
28  
29 the data, performed the statistical analysis and contributed in drafting the manuscript along  
30  
31 with MS, CSL, FJ and AS. KL, AS and MS were responsible for categorization of the  
32  
33 patients. All authors read and approved the final version of the manuscript.  
34  
35  
36  
37

### 38 **COMPETING INTERESTS**

39  
40 The authors have no competing interests to declare.  
41  
42

### 43 **FUNDING**

44  
45  
46 This study was supported by the Swedish Research Council (K2007-70X-20514-01-3) and  
47  
48 Asia Link (348-2006-6633). KL and FJ both received scholarships from Sida to visit the study  
49  
50 settings and perform the study. MS is a recipient of a scholarship from Erasmus Mundus  
51  
52 External Cooperation Window Lot-15, India.  
53  
54

### 55 **ACKNOWLEDGEMENT**

1  
2  
3 The authors are thankful to all nurses and the management of both hospitals for their support  
4  
5 and help during the study.  
6  
7

## 8 DATA SHARING STATEMENT

9  
10  
11 As per the institutional policy, the data is available with the Institutional ethics committee.

12  
13 This is to protect the patient's confidentiality and to ensure the electronic security of the data.

14  
15 The data could be made available to all interested researchers upon request made to; The  
16  
17 Chairman, Ethics Committee, R.D. Gardi Medical College, Agar Road, Ujjain, Madhya  
18  
19 Pradesh, India 456006 (Email: [iecrdgmcc@yahoo.in](mailto:iecrdgmcc@yahoo.in), [uctharc@sancharnet.in](mailto:uctharc@sancharnet.in)), giving all details  
20  
21 of the article. The ethical approval number: 41/2007 needs to be quoted along with the  
22  
23 request.  
24  
25  
26  
27  
28  
29

## 30 References

- 31  
32  
33 1. World Health Organization. The evolving threat of antimicrobial resistance: Options  
34 for action. WHO Publications. Geneva; 2014;  
35 [http://whqlibdoc.who.int/publications/2012/9789241503181\\_eng.pdf](http://whqlibdoc.who.int/publications/2012/9789241503181_eng.pdf)(accessed 2015  
36 Mar 13)  
37  
38 2. World Health Organization. The top 10 causes of death. Geneva; 2014;  
39 <http://www.who.int/mediacentre/factsheets/fs310/en/>(accessed 2015 Mar 13)  
40  
41 3. Global Antibiotic Resistance Partnership (GARP) India Working Group. Rationalizing  
42 antibiotic use to limit antibiotic resistance in India. *Indian J Med Res.* 2011.134:281–  
43 94.  
44  
45 4. Bhutta Z a, Sommerfeld J, Lassi ZS, et al. Global burden, distribution, and  
46 interventions for infectious diseases of poverty. *Infect Dis poverty.* 2014.3(1):21.  
47  
48 5. Global Antibiotic Resistance Partnership (GARP) India Working Group. Antibiotic  
49 Use and Resistance in India. New Dehli; 2011;  
50 [http://www.cddep.org/publications?page=1&f\[0\]=field\\_region:13](http://www.cddep.org/publications?page=1&f[0]=field_region:13)(accessed 2015 Mar  
51 13)  
52  
53 6. World Health Organization. Disease and injury country estimates: Burden of disease.  
54  
55 Geneva;  
56  
57  
58  
59  
60



- 1  
2  
3 [http://www.who.int/healthinfo/global\\_burden\\_disease/estimates\\_country/en/index.html](http://www.who.int/healthinfo/global_burden_disease/estimates_country/en/index.html)  
4 (accessed 2015 Mar 13)  
5  
6  
7 7. Kumar SG, Adithan C, Harish BN, et al. Antimicrobial resistance in India: A review. *J*  
8 *Nat Sci Biol Med.* 2013.4(2):286–91.  
9  
10 8. Wilcox MH, Freeman J, Fawley W, et al. Long-term surveillance of cefotaxime and  
11 piperacillin – tazobactam prescribing and incidence of *Clostridium difficile* diarrhoea.  
12 *J Antimicrob Chemother.* 2004.54(1):168–72.  
13  
14 9. Van Boeckel TP, Gandra S, Ashok A, et al. Global antibiotic consumption 2000 to  
15 2010: An analysis of national pharmaceutical sales data. *Lancet Infect Dis.*  
16 2014.14(April):742–50.  
17  
18 10. The World Bank. World development indicators, GNI per capita, Atlas method. 2015;  
19 <http://data.worldbank.org/indicator/NY.GNP.PCAP.CD>(accessed 2016 May 22)  
20  
21 11. Sharma M, Damlin AL, Sharma A, et al. Antibiotic prescribing in medical intensive  
22 care units – a comparison between two private sector hospitals in Central India. *Infect*  
23 *Dis (Auckl).* 2015.(February 2015):302–9.  
24  
25 12. Sharma M, Damlin A, Pathak A, et al. Antibiotic Prescribing among Pediatric  
26 Inpatients with Potential Infections in Two Private Sector Hospitals in Central India.  
27 *PLoS One.* 2015.10.  
28 <http://journals.plos.org/plosone/article?id=10.1371/journal.pone.0142317>  
29  
30 13. WHOCC. ATC/DDD Index. 2015; [http://www.whooc.no/atc\\_ddd\\_index/](http://www.whooc.no/atc_ddd_index/)(accessed  
31 2015 Mar 13)  
32  
33 14. WHO Int WG for Drug Statistics Methodology. Introduction to Drug Utilization  
34 Research. Oslo; 2003; p. 1–48.  
35 [http://www.whooc.no/filearchive/publications/drug\\_utilization\\_research.pdf](http://www.whooc.no/filearchive/publications/drug_utilization_research.pdf)(accessed  
36 2015 Mar 13)  
37  
38 15. Sharma M, Eriksson B, Marrone G, et al. Antibiotic prescribing in two private sector  
39 hospitals; one teaching and one non-teaching: A cross-sectional study in Ujjain, India.  
40 *BMC Infect Dis.* 2012.12:155.  
41  
42 16. Organization CDSC. National List of Essential Medicines. New Dehli; 2011;  
43 <http://pharmaceuticals.gov.in/nlem.pdf>(accessed 2015 Mar 13)  
44  
45 17. World Health Organization. Model List of Essential Medicines. Geneva; 2013; p. 1–43.  
46 [http://www.who.int/medicines/organization/par/edl/expcom13/eml13\\_en.pdf](http://www.who.int/medicines/organization/par/edl/expcom13/eml13_en.pdf)(accessed  
47 2015 Mar 13)  
48  
49 18. Enzler MJ, Berbari E, Osmon DR. Antimicrobial prophylaxis in adults. *Mayo Clin*  
50 *Proc.* 2011.86(1):686–701. <http://dx.doi.org/10.4065/mcp.2011.0012>  
51  
52 19. Bisno A, Butchart EG, Ganguly NK, et al. Rheumatic Fever and Rheumatic Heart  
53 Disease. *Who Tech Rep Ser.* 2001.923(November 2001):1–122.  
54  
55  
56  
57  
58  
59  
60

- 1
  - 2
  - 3
  - 4
  - 5
  - 6
  - 7
  - 8
  - 9
  - 10
  - 11
  - 12
  - 13
  - 14
  - 15
  - 16
  - 17
  - 18
  - 19
  - 20
  - 21
  - 22
  - 23
  - 24
  - 25
  - 26
  - 27
  - 28
  - 29
  - 30
  - 31
  - 32
  - 33
  - 34
  - 35
  - 36
  - 37
  - 38
  - 39
  - 40
  - 41
  - 42
  - 43
  - 44
  - 45
  - 46
  - 47
  - 48
  - 49
  - 50
  - 51
  - 52
  - 53
  - 54
  - 55
  - 56
  - 57
  - 58
  - 59
  - 60
20. World Health Organization. Guidelines for the treatment of malaria, 2nd edition. Geneva; 2010; p. 197p. [http://whqlibdoc.who.int/publications/2010/9789241547925\\_eng.pdf](http://whqlibdoc.who.int/publications/2010/9789241547925_eng.pdf)(accessed 2015 Mar 13)
21. Alvarez-uria G, Zachariah S, Thomas D. High prescription of antimicrobials in a rural district hospital in India. *Pharm Pr*. 2014.12(2):1–4.
22. Habib G, Hoen B, Tornos P, et al. Guidelines on the prevention, diagnosis, and treatment of infective endocarditis. *Eur Heart J*. 2009.30:2369–413.
23. Maisch B, Seferović PM, Ristić AD, et al. Guidelines on the Diagnosis and Management of Pericardial Diseases: Executive Summary. Vol. 25, *European Heart Journal*. 2004; p. 587–610.
24. Schultheiss HP, Khl U, Cooper LT. The management of myocarditis. *Eur Heart J*. 2011.32:2616–25.
25. Tripathi K. Essentials of Medical Pharmacology. Antimicrobial Drugs. 6th edition. 6th ed. New Dehli: Jaypee Brothers Medical Publishers; 2012;
26. Kumar R, Indira K, Rizvi a., et al. Antibiotic prescribing practices in primary and secondary health care facilities in Uttar Pradesh, India. *J Clin Pharm Ther*. 2008.33:625–34.
27. Means AR, Weaver MR, Burnett SM, et al. Correlates of inappropriate prescribing of antibiotics to patients with malaria in Uganda. *PLoS One*. 2014.9(2):1–7.
28. Pitaknetinan K, Tangcharoensathien V, Supachutikul a, et al. Profit, payment and pharmaceutical practices: perspectives from hospitals in Bangkok. *Health Policy*. 1999.46:179–94. <http://www.ncbi.nlm.nih.gov/pubmed/10351667>
29. Who. Promoting rational use of medicines: core components. *WHO Policy Perspect Med*. 2002.:1–6. <http://apps.who.int/medicinedocs/pdf/h3011e/h3011e.pdf>
30. Blumenthal D. Doctors and Drug Companies. *N Engl J Med*. 2004.351:1885–7.
31. Pathak A, Mahadik K, Dhaneria SP, et al. Surveillance of antibiotic consumption using the “focus of infection” approach in 2 hospitals in Ujjain, India. *PLoS One*. 2012.7(6).

Figure 1. The process of selection and grouping of inpatients admitted in medicine departments of the TH and the NTH based on their diagnosis

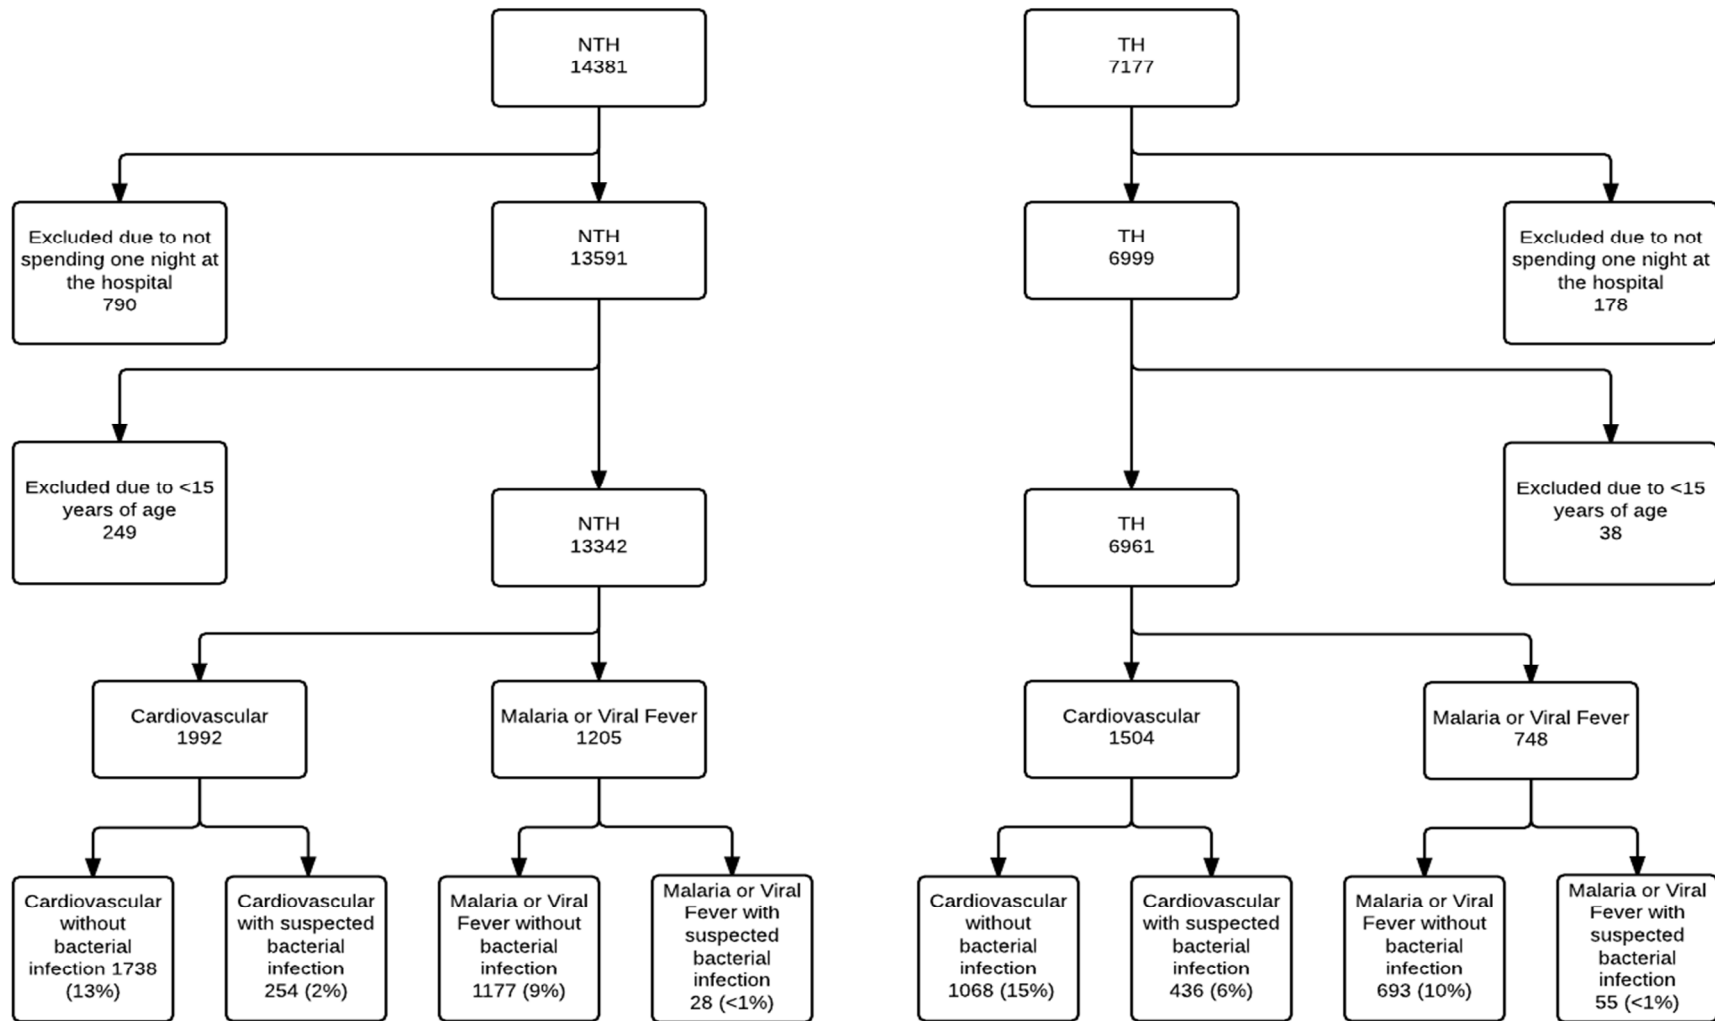

Abbreviations: NTH: non-teaching hospital TH: teaching hospital

Figure 2: Top 90% of prescription in the four selected groups measured in DDD/1000 patients, presented at fourth level of the ATC classification at one teaching and one non-teaching hospitals in Ujjain, India

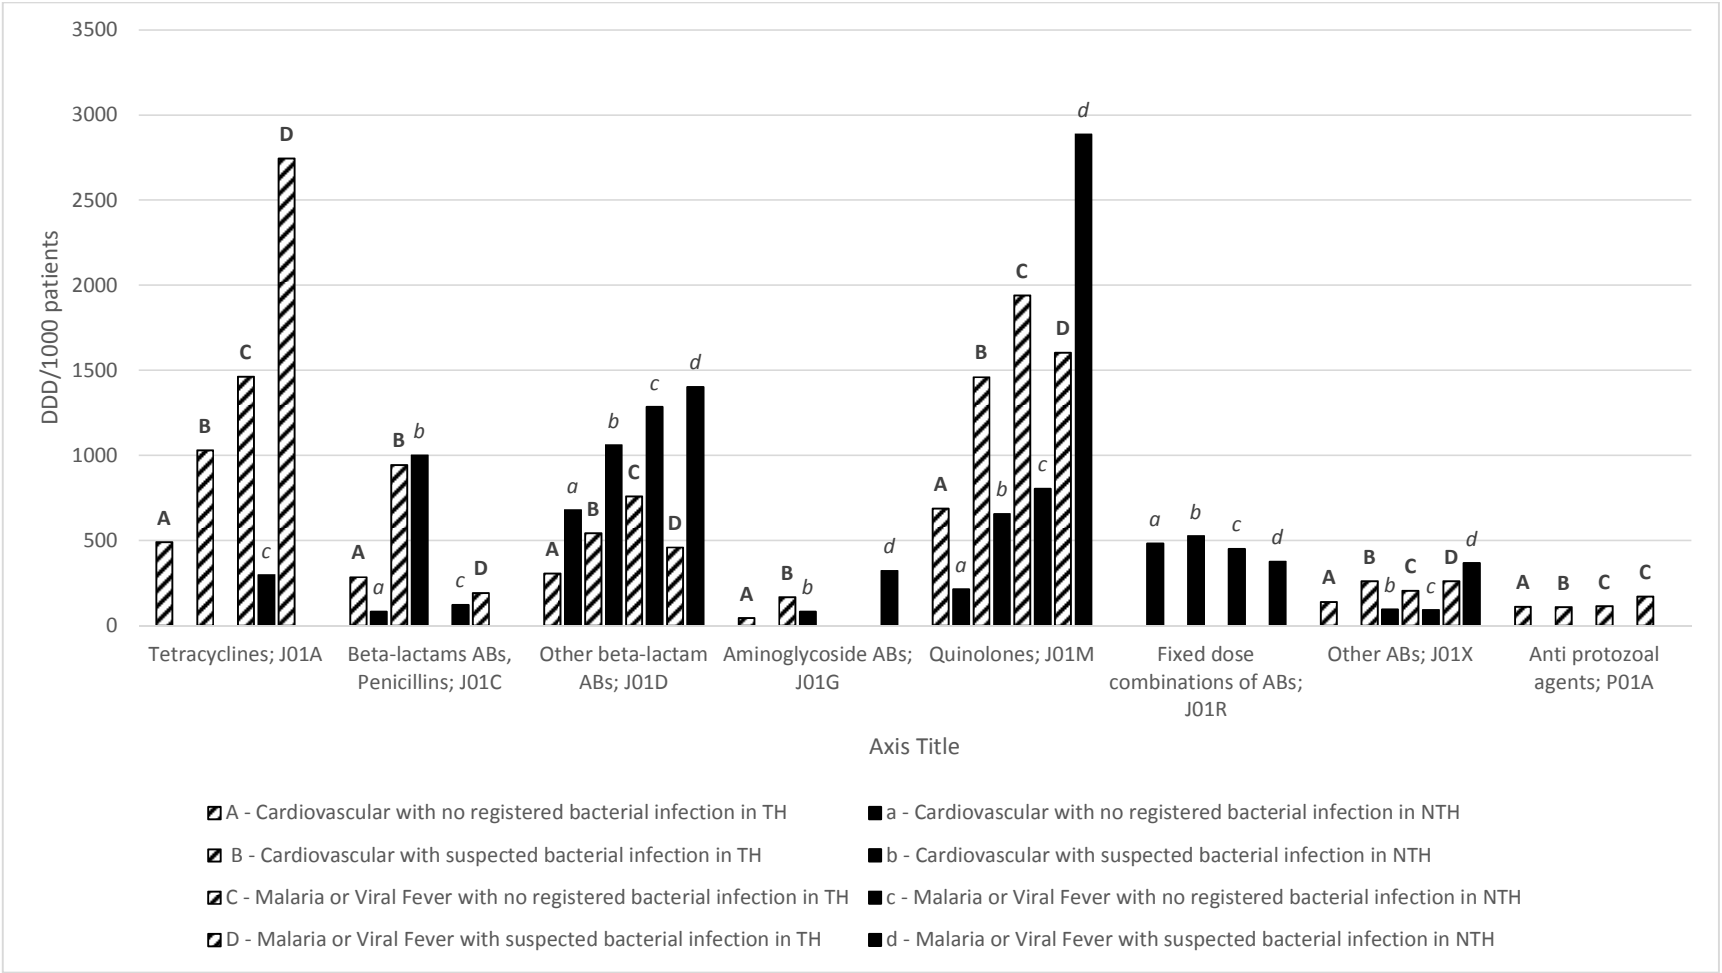

Abbreviations: AB-antibiotics NTH-non-teaching hospital, TH-teaching hospital, DDD- Defined Daily Doses

## STROBE Statement—checklist of items that should be included in reports of observational studies

|                           | Item No | Recommendation                                                                                                                                                                             | Page number |
|---------------------------|---------|--------------------------------------------------------------------------------------------------------------------------------------------------------------------------------------------|-------------|
| <b>Title and abstract</b> | 1       | (a) Indicate the study's design with a commonly used term in the title or the abstract                                                                                                     | 1           |
|                           |         | (b) Provide in the abstract an informative and balanced summary of what was done and what was found                                                                                        | 2-3         |
| <b>Introduction</b>       |         |                                                                                                                                                                                            |             |
| Background/rationale      | 2       | Explain the scientific background and rationale for the investigation being reported                                                                                                       | 5           |
| Objectives                | 3       | State specific objectives, including any pre specified hypotheses                                                                                                                          | 6           |
| <b>Methods</b>            |         |                                                                                                                                                                                            |             |
| Study design              | 4       | Present key elements of study design early in the paper                                                                                                                                    | 6           |
| Setting                   | 5       | Describe the setting, locations, and relevant dates, including periods of recruitment, exposure, follow-up, and data collection                                                            | 6           |
| Participants              | 6       | (a) <i>Cohort study</i> —Give the eligibility criteria, and the sources and methods of selection of participants. Describe methods of follow-up                                            | 7           |
|                           |         | <i>Case-control study</i> —Give the eligibility criteria, and the sources and methods of case ascertainment and control selection. Give the rationale for the choice of cases and controls |             |
|                           |         | <i>Cross-sectional study</i> —Give the eligibility criteria, and the sources and methods of selection of participants                                                                      |             |
|                           |         | (b) <i>Cohort study</i> —For matched studies, give matching criteria and number of exposed and unexposed                                                                                   |             |
|                           |         | <i>Case-control study</i> —For matched studies, give matching criteria and the number of controls per case                                                                                 |             |
| Variables                 | 7       | Clearly define all outcomes, exposures, predictors, potential confounders, and effect modifiers. Give diagnostic criteria, if applicable                                                   | 7           |
| Data sources/ measurement | 8*      | For each variable of interest, give sources of data and details of methods of assessment (measurement). Describe comparability of assessment methods if there is more than one group       | 8           |
| Bias                      | 9       | Describe any efforts to address potential sources of bias                                                                                                                                  | 9           |
| Study size                | 10      | Explain how the study size was arrived at                                                                                                                                                  | 8           |

|    |                        |    |                                                                          |             |
|----|------------------------|----|--------------------------------------------------------------------------|-------------|
| 1  | Quantitative variables | 11 | Explain how quantitative variables were handled in the analyses.         | <b>8-10</b> |
| 2  |                        |    | If applicable, describe which groupings were chosen and why              |             |
| 3  |                        |    |                                                                          |             |
| 4  |                        |    |                                                                          |             |
| 5  | Statistical methods    | 12 | (a) Describe all statistical methods, including those used to            |             |
| 6  |                        |    | control for confounding                                                  |             |
| 7  |                        |    |                                                                          |             |
| 8  |                        |    | (b) Describe any methods used to examine subgroups and                   |             |
| 9  |                        |    | interactions                                                             |             |
| 10 |                        |    |                                                                          |             |
| 11 |                        |    | (c) Explain how missing data were addressed                              |             |
| 12 |                        |    |                                                                          |             |
| 13 |                        |    | (d) <i>Cohort study</i> —If applicable, explain how loss to follow-up    | <b>10</b>   |
| 14 |                        |    | was addressed                                                            |             |
| 15 |                        |    |                                                                          |             |
| 16 |                        |    | <i>Case-control study</i> —If applicable, explain how matching of cases  |             |
| 17 |                        |    | and controls was addressed                                               |             |
| 18 |                        |    |                                                                          |             |
| 19 |                        |    | <i>Cross-sectional study</i> —If applicable, describe analytical methods |             |
| 20 |                        |    | taking account of sampling strategy                                      |             |
| 21 |                        |    |                                                                          |             |
| 22 |                        |    | (e) Describe any sensitivity analyses                                    |             |
| 23 |                        |    |                                                                          |             |
| 24 |                        |    |                                                                          |             |
| 25 |                        |    |                                                                          |             |
| 26 |                        |    |                                                                          |             |
| 27 |                        |    |                                                                          |             |
| 28 |                        |    |                                                                          |             |
| 29 |                        |    |                                                                          |             |
| 30 |                        |    |                                                                          |             |
| 31 |                        |    |                                                                          |             |
| 32 |                        |    |                                                                          |             |
| 33 |                        |    |                                                                          |             |
| 34 |                        |    |                                                                          |             |
| 35 | Continued on next page |    |                                                                          |             |
| 36 |                        |    |                                                                          |             |
| 37 |                        |    |                                                                          |             |
| 38 |                        |    |                                                                          |             |
| 39 |                        |    |                                                                          |             |
| 40 |                        |    |                                                                          |             |
| 41 |                        |    |                                                                          |             |
| 42 |                        |    |                                                                          |             |
| 43 |                        |    |                                                                          |             |
| 44 |                        |    |                                                                          |             |
| 45 |                        |    |                                                                          |             |
| 46 |                        |    |                                                                          |             |
| 47 |                        |    |                                                                          |             |
| 48 |                        |    |                                                                          |             |
| 49 |                        |    |                                                                          |             |
| 50 |                        |    |                                                                          |             |
| 51 |                        |    |                                                                          |             |
| 52 |                        |    |                                                                          |             |
| 53 |                        |    |                                                                          |             |
| 54 |                        |    |                                                                          |             |
| 55 |                        |    |                                                                          |             |
| 56 |                        |    |                                                                          |             |
| 57 |                        |    |                                                                          |             |
| 58 |                        |    |                                                                          |             |
| 59 |                        |    |                                                                          |             |
| 60 |                        |    |                                                                          |             |

Continued on next page

| <b>Results</b>           |     |                                                                                                                                                                                                                                                                                                                                                                                                               | <b>Page Number</b>                 |
|--------------------------|-----|---------------------------------------------------------------------------------------------------------------------------------------------------------------------------------------------------------------------------------------------------------------------------------------------------------------------------------------------------------------------------------------------------------------|------------------------------------|
| Participants             | 13* | (a) Report numbers of individuals at each stage of study—eg numbers potentially eligible, examined for eligibility, confirmed eligible, included in the study, completing follow-up, and analysed                                                                                                                                                                                                             | <b>10,12</b>                       |
|                          |     | (b) Give reasons for non-participation at each stage                                                                                                                                                                                                                                                                                                                                                          |                                    |
|                          |     | (c) Consider use of a flow diagram                                                                                                                                                                                                                                                                                                                                                                            |                                    |
| Descriptive data         | 14* | (a) Give characteristics of study participants (eg demographic, clinical, social) and information on exposures and potential confounders                                                                                                                                                                                                                                                                      | <b>10-12</b>                       |
|                          |     | (b) Indicate number of participants with missing data for each variable of interest                                                                                                                                                                                                                                                                                                                           |                                    |
|                          |     | (c) <i>Cohort study</i> —Summarise follow-up time (eg, average and total amount)                                                                                                                                                                                                                                                                                                                              |                                    |
| Outcome data             | 15* | <i>Cohort study</i> —Report numbers of outcome events or summary measures over time                                                                                                                                                                                                                                                                                                                           | <b>11, 14-15</b>                   |
|                          |     | <i>Case-control study</i> —Report numbers in each exposure category, or summary measures of exposure                                                                                                                                                                                                                                                                                                          |                                    |
|                          |     | <i>Cross-sectional study</i> —Report numbers of outcome events or summary measures                                                                                                                                                                                                                                                                                                                            |                                    |
| Main results             | 16  | (a) Give unadjusted estimates and, if applicable, confounder-adjusted estimates and their precision (eg, 95% confidence interval). Make clear which confounders were adjusted for and why they were included<br>(b) Report category boundaries when continuous variables were categorized<br>(c) If relevant, consider translating estimates of relative risk into absolute risk for a meaningful time period | <b>11,15,16</b><br><b>Figure 2</b> |
| Other analyses           | 17  | Report other analyses done—eg analyses of subgroups and interactions, and sensitivity analyses                                                                                                                                                                                                                                                                                                                |                                    |
| <b>Discussion</b>        |     |                                                                                                                                                                                                                                                                                                                                                                                                               |                                    |
| Key results              | 18  | Summarise key results with reference to study objectives                                                                                                                                                                                                                                                                                                                                                      | <b>17</b>                          |
| Limitations              | 19  | Discuss limitations of the study, taking into account sources of potential bias or imprecision. Discuss both direction and magnitude of any potential bias                                                                                                                                                                                                                                                    | <b>17</b>                          |
| Interpretation           | 20  | Give a cautious overall interpretation of results considering objectives, limitations, multiplicity of analyses, results from similar studies, and other relevant evidence                                                                                                                                                                                                                                    | <b>18-20</b>                       |
| Generalisability         | 21  | Discuss the generalisability (external validity) of the study results                                                                                                                                                                                                                                                                                                                                         | <b>21</b>                          |
| <b>Other information</b> |     |                                                                                                                                                                                                                                                                                                                                                                                                               |                                    |
| Funding                  | 22  | Give the source of funding and the role of the funders for the present study and, if applicable, for the original study on which the present article is based                                                                                                                                                                                                                                                 | <b>23</b>                          |

\*Give information separately for cases and controls in case-control studies and, if applicable, for exposed and unexposed groups in cohort and cross-sectional studies.

# BMJ Open

## Antibiotic prescriptions to the inpatients having non-bacterial diagnosis at medicine departments of two private sector hospitals in Madhya Pradesh, India: a cross sectional study

|                                 |                                                                                                                                                                                                                                                                                                                                                                                                                                                                                                                                                                                                                                                                                                                                                                                                                                        |
|---------------------------------|----------------------------------------------------------------------------------------------------------------------------------------------------------------------------------------------------------------------------------------------------------------------------------------------------------------------------------------------------------------------------------------------------------------------------------------------------------------------------------------------------------------------------------------------------------------------------------------------------------------------------------------------------------------------------------------------------------------------------------------------------------------------------------------------------------------------------------------|
| Journal:                        | <i>BMJ Open</i>                                                                                                                                                                                                                                                                                                                                                                                                                                                                                                                                                                                                                                                                                                                                                                                                                        |
| Manuscript ID                   | bmjopen-2016-012974.R1                                                                                                                                                                                                                                                                                                                                                                                                                                                                                                                                                                                                                                                                                                                                                                                                                 |
| Article Type:                   | Research                                                                                                                                                                                                                                                                                                                                                                                                                                                                                                                                                                                                                                                                                                                                                                                                                               |
| Date Submitted by the Author:   | 27-Sep-2016                                                                                                                                                                                                                                                                                                                                                                                                                                                                                                                                                                                                                                                                                                                                                                                                                            |
| Complete List of Authors:       | Landstedt , Kristoffer; Karolinska Institutet, Global Health - Health Systems and Policy (HSP): Medicines, focusing antibiotics, Department of Public Health Sciences<br>Sharma, Ashish; R. D. Gardi Medical College, Department of Medicine<br>Johansson, Fredrik; Karolinska Institutet, Stockholm, Sweden, Global Health - Health Systems and Policy (HSP): Medicines, focusing antibiotics, Department of Public Health Sciences<br>Lundborg, Cecilia; Karolinska Institutet, Stockholm, Sweden, Global Health - Health Systems and Policy (HSP): Medicines, focusing antibiotics, Department of Public Health Sciences<br>Sharma, Megha; R. D. Gardi Medical College, Pharmacology; Karolinska Institutet, Global Health - Health Systems and Policy (HSP): Medicines, focusing antibiotics, Department of Public Health Sciences |
| <b>Primary Subject Heading</b>: | Public health                                                                                                                                                                                                                                                                                                                                                                                                                                                                                                                                                                                                                                                                                                                                                                                                                          |
| Secondary Subject Heading:      | Epidemiology, Global health, Infectious diseases, Public health, Health services research                                                                                                                                                                                                                                                                                                                                                                                                                                                                                                                                                                                                                                                                                                                                              |
| Keywords:                       | Antibiotics, Private sector hospitals, Medicine department, Inpatients, India, Non-Bacterial infections                                                                                                                                                                                                                                                                                                                                                                                                                                                                                                                                                                                                                                                                                                                                |
|                                 |                                                                                                                                                                                                                                                                                                                                                                                                                                                                                                                                                                                                                                                                                                                                                                                                                                        |

SCHOLARONE™  
Manuscripts



1  
2  
3 **Antibiotic prescriptions to the inpatients having non-bacterial diagnosis at medicine**  
4 **departments of two private sector hospitals in Madhya Pradesh, India: a cross sectional**  
5 **study**  
6

7 **Authors list:**

8 Kristoffer Landstedt<sup>1</sup>, Ashish Sharma<sup>2</sup>, Fredrik Johansson<sup>1</sup>, Cecilia StålsbyLundborg<sup>1\*</sup>, Megha  
9 Sharma<sup>1, 3\*§</sup>  
10

11 <sup>1</sup>Global Health - Health Systems and Policy (HSP): Medicines, focusing antibiotics,  
12 Department of Public Health Sciences, Karolinska Institutet, Tomtebodavägen 18A, 17177  
13 Stockholm, Sweden  
14

15 <sup>2</sup>Department of Medicine, Ruxmaniben Deepchand Gardi Medical College, Ujjain, India  
16

17 <sup>3</sup>Department of Pharmacology, Ruxmaniben Deepchand Gardi Medical College, Ujjain, India  
18  
19

20  
21  
22 \* Shared last authorship

23 §Corresponding author: Megha Sharma

24 Department of Pharmacology, Ruxmaniben Deepchand Gardi Medical College, Ujjain, India,  
25 Mobile: +91-98273-61961, Office- +91-7368-261288  
26  
27

28  
29 Global Health - Health Systems and Policy (HSP): Medicines, focusing antibiotics,  
30 Department of Public Health Sciences, Karolinska Institutet, Tomtebodavägen 18A, 17177  
31 Stockholm, Sweden  
32  
33

34  
35  
36  
37  
38 **Keywords:** Private sector hospitals, Medicine department, Antibiotics, Non-bacterial  
39 infections, Inpatients, India  
40  
41  
42  
43  
44

45 **Email addresses:**

46 KL: Landstedt\_N@hotmail.com

47 AS: ashishricha2001@yahoo.co.in

48 FJ: fredrik.johansson@stud.ki.se

49 CSL: cecilia.stalsby.lundborg@ki.se

50 MS: meghasharma27@rediffmail.com  
51  
52  
53  
54  
55  
56  
57  
58  
59  
60

## Abstract

**Objectives:** To present and compare antibiotic prescribing among inpatients among most common non-bacterial diagnoses groups at medicine departments of a teaching (TH) and a non-teaching hospital (NTH) in Central India.

**Setting:** An observational cross-sectional study was conducted at two tertiary care settings at Ujjain district, Madhya Pradesh, India.

**Participants:** The data was collected manually, using a customized form. Complete records of all inpatients, who were >15 years of age and stayed at-least for one night in either of the hospitals during 2008-2011, were analysed.

**Outcome measures:** Inpatients were grouped based on the presence or absence of; a bacterial infectious diagnosis, viral/ malaria fever or cardiovascular diseases. Classes of antibiotics prescribed to these groups, and adherence to the available prescribing guidelines were compared between the hospitals using the notes from the patient files, and the diagnoses.

**Results:** Of 20303 inpatients included in the study, 66% were prescribed antibiotics. Trade name prescribing and use of broad spectrum antibiotics were more frequent at the NTH compared to the TH ( $p<0.001$ ). At the TH significantly higher proportion of patients having fever without registered bacterial infection; were prescribed antibiotics (82%) compared with the NTH (71%,  $p<0.001$ ). Patients admitted for cardiovascular diagnosis without registered bacterial infections received antibiotic prescriptions at both hospitals; (NTH- 47%and TH- 37%); it was significantly higher at the NTH ( $p<0.001$ ). None of the diagnoses were confirmed by microbiology reports.

**Conclusions:** Prescribing antibiotic including broad spectrum antibiotics to the inpatients without bacterial infections i.e. viral fever, malaria and cardiovascular diseases were common

1  
2  
3 at both hospitals which increase the risk for development of bacterial resistance, a global  
4 public health threat. Taking account of over prescribing of antibiotics, development and  
5 implementation of local prescribing guidelines, encouragement to use laboratory facilities,  
6 and prescription analysis, with antibiotic stewardship programs are the main  
7 recommendations for the settings.  
8  
9  
10  
11  
12  
13  
14  
15  
16  
17  
18  
19  
20  
21  
22  
23  
24  
25  
26  
27  
28  
29  
30  
31  
32  
33  
34  
35  
36  
37  
38  
39  
40  
41  
42  
43  
44  
45  
46  
47  
48  
49  
50  
51  
52  
53  
54  
55  
56  
57  
58  
59  
60

For peer review only

### Strengths and limitations

- Prospective study over a long time period of three years and inclusion of all patients, irrespective of their age and sex strengthens the representativeness of the results and overcome the seasonal variations.
- Data collecting tools were same at both study hospitals and the staff who collected the data was trained by the same person at both locations to minimize the variances.
- An observational non-interventional study design might have minimized the effect on the prescribers of being observed and audited.
- All possible efforts were made to minimize the risk of missing data by continuous monitoring and cross checking of the data. However, some data, for example few diagnoses might have been lost during translation from analogue to digital records.
- A big proportion of patients were categorised in the suspected bacterial diagnosis groups. Some of these diagnoses could have been categorised in non-bacterial diagnoses group if confirmed aetiology, i.e. microbiology reports, was present. This could have contributed to even higher antibiotic prescribing rates in the non-bacterial diagnoses group. However, due to absence of confirmed aetiology and observational study design this was indispensable.

## BACKGROUND

Increasing morbidity and mortality due to infectious diseases, despite of the availability of the lifesaving antibiotics is an alarming situation, globally,[1]. These incidences of mortalities due to infections are higher in low- and middle-income countries than in high-income countries,[2–4]. The WHO has reported a high burden of communicable diseases in India, and infections are responsible for 28% of the total mortality in the country,[5,6]. Additionally, antibiotic resistance in India is reported to be high. However, figures cannot be generalized to all Indian settings as the bacterial resistance patterns widely vary between its regions and settings and most studies so far have been relatively limited in scope,[7].

Irrational (both over- and under-) use of antibacterials, is of global concern. It results in unnecessary treatment costs, is a potential risk for the development of antibiotic resistance and side effects such as antibiotic associated diarrhoea caused by *Clostridium difficile* or gastroenteritis,[8]. According to a report, the global consumption of antibiotics increased by 36% between 2000 and 2010 of which five countries including India (Brazil, Russia, India, China and South Africa) accounted for 76% of this increase,[9]. Despite of the paucity of studies that describe antibiotic prescribing from India, Van Boeckel et al presented India on the top of the list of antibiotic consumption with  $12.9 \times 10^9$  units in 2010 where one unit indicates a pill, capsule or ampoule,[1,9]. However, this increase might also have meant that segments of the population that previously had no access to antibiotics can now access antibiotics yet it cannot be disregarded that antibiotic resistance is a sequel of antibiotic use,[10].

It is thus imperative to map the prescribing patterns of antibiotics on a local level to address the potential need of improvement and to counter the consequences of inappropriate prescription of antibiotics. Indian private sector are the major healthcare providers but little is known about prescribing patterns in this sector,[11–14].

## OBJECTIVES

The study was conducted to present, analyse and compare antibiotic prescribing to the inpatients enrolled for most common non-bacterial diagnoses at the medicine departments of a teaching (TH) and a non-teaching hospital (NTH) in Central India.

## METHODS

### Study design

A cross sectional observational design was selected to conduct the study.

### Setting

The study was conducted at the medicine departments of two tertiary care hospitals from private sector in Ujjain district, India. The hospitals are addressed as teaching hospital (TH) and non-teaching hospital (NTH). Both hospitals are run by the same trust. The TH is located in a rural area of Ujjain district and had 570 beds at the time of the study. The NTH is located in the central part of Ujjain city and had 350 beds at the time of the study. The TH provides medical services including medical treatment and free of charge medicines to all patients while the NTH charges for the medical facilities on a 'no profit-no loss' basis. Patients from the NTH have to buy prescribed medicines out-of-pocket from the pharmacies inside or outside the hospital. The physicians at the TH are salary paid and do not have any direct exposure to the sales representatives of pharmaceutical companies. Furthermore, the management at the TH is responsible for the purchase and supply of the drugs.

Hospital level Essential medicine list was available in written form at the TH but no specific implementation activities were conducted during the study period. Local prescribing guidelines were not present in any of the hospitals. Almost all physicians practicing at the NTH also had private practice and could be contacted by the representatives of pharmaceutical companies easily. The payments of the physicians at the NTH increase above

1  
2  
3 par according to the number of patients they admit in the hospital and the number of visits  
4  
5 made to the inpatients. Both hospitals are tertiary care hospitals with a number of specialty  
6  
7 departments such as; Pediatrics, Obstetrics and Gynecology, Surgery, Orthopedics,  
8  
9 Pulmonary Medicine, and so on to treat specific patients. For example; patients presenting  
10  
11 with complaints related to lungs and chest (other than heart) visit the Pulmonary Medicine  
12  
13 department. A well-equipped microbiology laboratory was present to process the samples free  
14  
15 of cost for all from the TH and with nominal charges from the NTH.  
16  
17

## 18 19 **Participants**

### 20 21 **Inclusion and exclusion criteria**

22  
23 Patients who stayed for at least one night at medicine departments of either of the two  
24  
25 hospitals were considered as inpatients and included in the study. Patients who had  
26  
27 incomplete records or admitted to the medical intensive care units within the medicine  
28  
29 departments were not included in the analysis. Treatment recommendations including dose  
30  
31 and frequency is different for patients under 15 years of age and the DDD measurement is not  
32  
33 applicable to them, thus they were also excluded,[15].  
34  
35  
36

### 37 38 **Variables**

39  
40 The patient information was analysed for age, sex, diagnosis, duration of hospitals stay, if  
41  
42 they received antibiotic treatment, and duration of antibiotic treatment. The prescriptions were  
43  
44 analysed for the type of antibiotics prescribed, its dose, and frequency. The antibiotics were  
45  
46 classified according to the Anatomical Therapeutic Chemical (ATC) classification given by  
47  
48 the WHO Collaborating Centre for Drug Statistics Methodology (WHOCC),[16]. Defined  
49  
50 Daily Doses (DDD) were calculated for all prescribed antibiotics,[16]. DDD is a technical  
51  
52 unit for comparative purposes and is the average daily dose of the specific drug for its main  
53  
54 indication in adults,[15]. Fixed dose combinations of antibiotics (FDCs) that did not have an  
55  
56 ATC code assigned by WHOCC were assigned the code 'J01RA\*' according to Sharma et  
57  
58  
59  
60

1  
2  
3 al,[17]. FDCs that did not have a DDD were assigned one by examining the constituents and  
4  
5 the proportions in which they were found in one unit dose. DDD was then calculated on the  
6  
7 basis of number of units and converted to dose in gram. Total number of antibiotics  
8  
9 prescribed during hospital stay was counted per patient and was termed as prescribing  
10  
11 occasions.

12  
13  
14 The List of Essential Medicines of India (NLEMI) is based on the WHO list of essential  
15  
16 medicines (WHOLEM) and adapted to the disease panorama of India,[18]. These lists serve  
17  
18 as guidelines to promote the prescribing of safe, cheap and effective drugs to the  
19  
20 population,[18,19]. Adherence to these lists was evaluated for all prescriptions.  
21  
22

### 23 24 **Data sources and considerations**

25  
26  
27 The data collection process is described in detail elsewhere,[13,14]. In brief, the study was  
28  
29 conducted prospectively between April 1<sup>st</sup>, 2008 and March 31<sup>st</sup>, 2011. Patient throughput in  
30  
31 the TH and the NTH amounted to 29026 and 41561 patients respectively. The data were  
32  
33 manually collected by the nurses using a specially designed form attached to the patient's file  
34  
35 at the medicine department of the TH and the NTH. All patients were included to minimize  
36  
37 the possibility of selection bias. Every admission in the department was considered as a new  
38  
39 patient. The nurses and new recruits were trained regularly for the data collection by the last  
40  
41 author (MS). The data collection form was updated daily based on patient's day to day  
42  
43 progress. All notes written in the patient files by the treating consultant were recorded and  
44  
45 included for the analysis. It was possible that a patient could have more than one diagnosis.  
46  
47 Therefore all indications, diagnoses and/or symptoms recorded in the patient files, were  
48  
49 transferred to the data collection form. The data was translated to digital data files using EPI  
50  
51 Info 3.1 and Microsoft Excel. Two specifically trained data entry operators translated the  
52  
53 diagnoses as per 'International Classification of Diseases' (ICD-10 codes),[20,21] and the  
54  
55  
56  
57  
58  
59  
60



1  
2  
3 generic names of the prescribed antibiotics were translated to WHO assigned ATC-codes and  
4  
5 Defined Daily Doses (DDDs) per day,[15].  
6  
7

8 In order to exclude all clinically suspected cases of bacterial infection and following the aim  
9  
10 of the study, best possible efforts were made to distinguish the patients who had any  
11  
12 indications even for secondary antibiotic prophylaxis from those who did not,[22–24]. The  
13  
14 patients were categorized into three main groups using the diagnoses registered in the patient  
15  
16 files and the ICD-10 codes; Group (a) cardiovascular diseases, (b) non-bacterial fevers and (c)  
17  
18 all diagnoses other than Group (a) and (b) including all types of bacterial infections. Sixty  
19  
20 seven percent of patients in the TH and 75% in the NTH were included in Group (c). All  
21  
22 cases of chronic obstructive pulmonary disease (COPD) were also included in Group c.  
23  
24 Although aetiology of the disease was seldom specified in the records but these patients  
25  
26 should receive less restricted antibiotic treatment.  
27  
28

29  
30  
31 Groups (a) and (b) were selected for detail study of the antibiotic prescribing for non-bacterial  
32  
33 diagnoses as per the study aim. In 'Group (a)', hypertension, acute myocardial infarction and  
34  
35 valvular heart disease were the most common diagnoses. In 'Group (b)' different types of  
36  
37 malaria and cases of viral fever were included. These non-bacterial fevers were common in  
38  
39 both study settings. It has previously been reported that antibiotics are prescribed to a high  
40  
41 extent to patients having malaria or viral fever in malaria endemic countries like Uganda  
42  
43 (Figure 1),[25]. Moreover, Groups (a) and (b) comprised the largest homogenous patient  
44  
45 groups in our study settings.  
46  
47

48  
49 **Figure 1. The process of selection and grouping of inpatients admitted in medicine departments**  
50 **of the TH and the NTH based on their diagnosis.**  
51

52 These groups were further divided into four sub-groups to identify and analyse the patients  
53  
54 exclusively having non-bacterial diagnoses corresponding to our study aim. The  
55  
56 cardiovascular group (Group a) was divided in two sub-groups; 'cardiovascular diseases with  
57  
58  
59  
60

1  
2  
3 no registered bacterial infection' (sub-group 1), 'cardiovascular diseases with suspected  
4 bacterial infection' (sub-group 2). Similarly, the non-infectious fever group (Group b) was  
5 divided 'malaria or viral fever with no registered bacterial infection' (sub-group 3) and  
6  
7 'malaria or viral fever with suspected bacterial infection' (sub-group 4, Figure 1).  
8  
9

10  
11  
12 All patients with rheumatic heart disease (RHD) were categorized in sub-group 2, since the  
13 WHO guidelines for secondary prevention after rheumatic fever sets the duration of  
14 preventive antibiotic treatment from five years up to life-long, depending on a number of  
15 factors e.g. time since the last episode of rheumatic fever and severity of valve engagement  
16 and supports an individual assessment of every case,[22,23].  
17  
18  
19

20  
21 An antibiotic prescribed for a day was considered as one prescribing occasion. Prescribed  
22 DDDs were calculated per 1000 patients. According to WHOCC, oral metronidazole  
23 (P01AB01) is coded as an antiprotozoal drug, but is coded as an antibacterial in the NLEMI.  
24  
25 Therefore it was considered as an antibacterial in this study,[18].  
26  
27  
28  
29  
30  
31  
32

### 33 **Ethics statement**

34  
35 Being an observational study, the data collection did not interfere with the treatment or caused  
36 any extra risks for the patients. Moreover, the names of the prescribers were not recorded to  
37 minimize the effect of being observed. All patients were assigned a unique code during the  
38 data entry to maintain anonymity of the inpatients. This unique code was used to compare  
39 details of patient information and antibiotic prescriptions for the analysis. The ethics  
40 committee of Ruxmaniben Deepchand Gardi Medical College, Ujjain, approved the study  
41 with approval number: 41/2007.  
42  
43  
44  
45  
46  
47  
48  
49  
50

### 51 **Statistical Methods**

52  
53 All frequency and percentage of categorical values were calculated. Sum, median, mean,  
54 range and standard deviation were calculated for continuous numerical values. Values were  
55  
56  
57  
58  
59  
60

1  
2  
3 rounded off to the closest whole number for percentage, prescription tables and in the text.  
4  
5 The independent t-test was used for comparison of normally distributed and continuous  
6  
7 variables. The chi-square test was used for comparison of categorical values. Fischer's exact  
8  
9 test was used for expected values below 5 and Pearson chi-square test was used for expected  
10  
11 values above 5. Bonferroni's correction for multiple comparisons was used and p- values  
12  
13 <0.001 were chosen for significance level to minimize the risks of type one errors. The data  
14  
15 were analysed with Excel, SPSS version 22 (SPSS Inc., Chicago, IL, USA) and STATA  
16  
17 version 13.1 (Stata Corp, College station, TX, USA).  
18  
19

## 20 21 **RESULTS**

22  
23  
24 During the study period, totally 21557 patients were admitted to the two medicine  
25  
26 departments, 7176 patients in the TH and 14381 in the NTH (Figure 1). Of the admitted  
27  
28 patients, records of 20 patients were incomplete, 949 (5%) stayed less than one night and 285  
29  
30 patients (1%) were aged <15 years. Therefore, as per the inclusion criteria 1254 patient  
31  
32 records were excluded and 20303 (94%) records were included for further analysis (6961 at  
33  
34 the TH and 13342 at the NTH, Figure 1).  
35  
36

37  
38 Most common diagnoses in the TH were chronic obstructive pulmonary disease (COPD,  
39  
40 10%), viral fever (7%) and hypertension (5%) while in the NTH were viral fever (10%),  
41  
42 malaria (6%) and COPD (5%, Table 1). Antibiotics were prescribed to 4540/6961 inpatients  
43  
44 (65%) in the TH and 8900/13342 (67%) in the NTH (Table 2). An average of eight and five  
45  
46 prescribing occasions was found per patient at the TH and the NTH respectively. Overall a  
47  
48 significantly higher proportion of the antibiotics prescribed in the TH adhered to the NLEMI;  
49  
50 77% prescriptions (27649/35732) than in the NTH; 60% (24683/41068, p<0.001).  
51  
52

53  
54 Seven percent of antibiotics in the TH were prescribed using generic names it was  
55  
56 significantly higher compared to the NTH (2%, p<0.001). Some antibiotics were prescribed  
57  
58  
59  
60

1  
2  
3 using trade names at the TH e.g., "Cipro", "Doxy", "Genta" and "Metrogyl". However, these  
4  
5 were local abbreviations devised by the staff for ciprofloxacin, doxycycline, gentamycin and  
6  
7 metronidazole respectively. Even though these four antibiotics were prescribed using trade  
8  
9 names, generic antibiotics were dispensed from the hospital pharmacy. A longer duration of  
10  
11 stay and longer duration of antibiotic treatment was observed at the TH (mean days; 6 and 6  
12  
13 respectively) compared to the NTH (mean days; 3 and 4 respectively,  $p < 0.001$ ).

### 14 15 16 17 **Distribution of inpatients in Groups a and b, and antibiotic prescription patterns**

18  
19 Cardiovascular diseases accounted for 48% of patients in Group (a) and (b) at the TH and  
20  
21 30% at the NTH. In the non-bacterial fever group, malaria was significantly more common at  
22  
23 the NTH (74%) and viral fever was significantly more common at the TH (66%,  $p < 0.001$ ,  
24  
25 Table 1).

26  
27  
28  
29 Broad-spectrum antibiotics such as third-generation cephalosporins (J01DD) and FDCs  
30  
31 (J01RA\*) comprised 52% of the prescribing occasions at the NTH of which FDCs accounted  
32  
33 for approximately half (Table 3). These classes accounted for 13% of total prescribing  
34  
35 occasions and <1% FDCs. At the NTH, cephalosporins (third-generation cephalosporins  
36  
37 J01DD, >30%) were most commonly prescribed for the cardiovascular diseases (>35%),  
38  
39 followed by FDCs (>20%). Fluoroquinolones (J01M) was the most commonly prescribed  
40  
41 antibiotic class in the TH in both (a) and (b) groups (>30% and >40% respectively).  
42  
43  
44  
45  
46  
47  
48  
49  
50  
51  
52  
53  
54  
55  
56  
57  
58  
59  
60

**Table 1: Diagnoses of the four groups of inpatients at medicine departments at one teaching and one non-teaching hospitals in Ujjain, India**

| Group (a): Cardiovascular diseases                                   |             |             |                                                                  |            |            | Group (b): Malaria or Viral fever                                            |            |             |                                                                          |           |           |
|----------------------------------------------------------------------|-------------|-------------|------------------------------------------------------------------|------------|------------|------------------------------------------------------------------------------|------------|-------------|--------------------------------------------------------------------------|-----------|-----------|
| Cardiovascular with no registered bacterial infection<br>Sub-group 1 |             |             | Cardiovascular with suspected bacterial infection<br>Sub-group 2 |            |            | Malaria or Viral Fever with no registered bacterial infection<br>Sub-group 3 |            |             | Malaria or Viral Fever with suspected bacterial infection<br>Sub-group 4 |           |           |
| Diagnosis group                                                      | TH          | NTH         | Diagnosis group                                                  | TH         | NTH        | Diagnosis group                                                              | TH         | NTH         | Diagnosis group                                                          | TH        | NTH       |
|                                                                      | n(%)        | n(%)        |                                                                  | n(%)       | n(%)       |                                                                              | n(%)       | n(%)        |                                                                          | n(%)      | n(%)      |
| <b>Total</b>                                                         | <b>1068</b> | <b>1738</b> | <b>Total</b>                                                     | <b>438</b> | <b>254</b> | <b>Total</b>                                                                 | <b>693</b> | <b>1177</b> | <b>Total</b>                                                             | <b>55</b> | <b>28</b> |
| Hypertension                                                         | 328(31)     | 470(27)     | COPD                                                             | 209(48)    | 77(30)     | Malaria                                                                      | 237(34)    | 872(74)     | COPD                                                                     | 10(18)    | 5(18)     |
| Cerebro vascular accident                                            | 126(12)     | 383(22)     | Rheumatic Heart Disease                                          | 130(30)    | 102(40)    | Cerebral malaria caused by <i>P. falciparum</i>                              | 4(1)       | 11(1)       | Urinarytract infection                                                   | 5(9)      | 7(25)     |
| Acute Myocardial Infarction                                          | 28(3)       | 202(12)     | Pulmonary Tuberculosis                                           | 19(4)      | 18(7)      | Malaria caused by <i>P. falciparum</i> UNS                                   | 9(1)       | 9(1)        | Tyfooid fever                                                            | 8(15)     | 2(7)      |
| Chronic Ischemic Heart Disease                                       | 17(2)       | 189(11)     | Urinarytract infection                                           | 17(4)      | 15(6)      | Malaria caused by <i>P. vivax</i> UNS                                        | 16(2)      | 61(5)       | Acute gastroenteritis                                                    | 4(7)      | 6(21)     |
| Coronary Artery Disease                                              | 98(9)       | 101(6)      | Acute Gastroenteritis                                            | 14(3)      | 12(5)      | Malaria UNS                                                                  | 208(30)    | 791(67)     | Disease of airways UNS                                                   | 8(15)     | 0(0)      |
| Left Ventricle Failure                                               | 44(4)       | 69(4)       | Lower airway infection UNS                                       | 13(3)      | 0(0)       | <b>Viral fever</b>                                                           | 456(66)    | 305(26)     | Disease of upper airways UNS                                             | 7(13)     | 0(0)      |
| Congestive Heart Failure                                             | 56(5)       | 39(2)       | Sepsis                                                           | 0(0)       | 5(2)       |                                                                              |            |             | Pulmonary Tuberculosis                                                   | 4(7)      | 2(7)      |
| Dilated Cardiomyopathy                                               | 79(7)       | 6(<1)       | HIV with infection                                               | 8(2)       | 1(<1)      |                                                                              |            |             | HIV with infection                                                       | 2(4)      | 0(0)      |
| Unspecified Cardiomyopathy                                           | 21(2)       | 54(3)       | Rheumatic Fever                                                  | 1(<1)      | 4(2)       |                                                                              |            |             | Rheumatic Heart Disease                                                  | 2(4)      | 1(4)      |
| Multiple Valve Disease                                               | 61(6)       | 7(<1)       | Endocarditis                                                     | 0(0)       | 4(2)       |                                                                              |            |             | Pelvic Inflammatory Disease                                              | 2(4)      | 0(0)      |
| Angina Pectoris                                                      | 10(1)       | 35(2)       | Pneumonia                                                        | 1(<1)      | 4(2)       |                                                                              |            |             | Pneumonia                                                                | 0(0)      | 1(4)      |
| Acute Ischemic Heart Disease                                         | 31(3)       | 11(1)       | Others                                                           | 26(6)      | 12(5)      |                                                                              |            |             | Other diagnoses                                                          | 3(5)      | 4(14)     |
| Deep Vein Thrombosis UNS                                             | 13(1)       | 19(1)       |                                                                  |            |            |                                                                              |            |             |                                                                          |           |           |
| Mitral Stenosis                                                      | 21(2)       | 2(<1)       |                                                                  |            |            |                                                                              |            |             |                                                                          |           |           |
| Hypertensive Heart Disease                                           | 20(2)       | 1(<1)       |                                                                  |            |            |                                                                              |            |             |                                                                          |           |           |
| Cardiac arrest                                                       | 2(<1)       | 16(1)       |                                                                  |            |            |                                                                              |            |             |                                                                          |           |           |
| Other                                                                | 113(11)     | 134(8)      |                                                                  |            |            |                                                                              |            |             |                                                                          |           |           |

Abbreviations: n (%): Number of patients (percentage in that diagnosis group), NTH: non-teaching hospital, TH: teaching hospital, COPD: chronic obstructive pulmonary disease, UNS: unspecified, *P.-plasmodium*, HIV: human immunodeficiency virus.

**Table 2: Demographic details and antibiotic prescribing information of the inpatients at medicine departments at one teaching and one non-teaching hospitals in Ujjain, India**

|                                           | Group (a): Cardiovascular diseases |            |                  |                                                                     |          |                  | Group (b): Malaria or Viral Fever                               |          |                  |                                                                             |          |                  |                                                                         |         |                    |
|-------------------------------------------|------------------------------------|------------|------------------|---------------------------------------------------------------------|----------|------------------|-----------------------------------------------------------------|----------|------------------|-----------------------------------------------------------------------------|----------|------------------|-------------------------------------------------------------------------|---------|--------------------|
|                                           | Medicine Department                |            |                  | Cardiovascular with no registered bacterial diagnosis (Sub-group 1) |          |                  | Cardiovascular with suspected bacterial infection (Sub-group 2) |          |                  | Malaria or Viral Fever with no registered bacterial diagnosis (Sub-group 3) |          |                  | Malaria or Viral Fever with suspected bacterial infection (Sub-group 4) |         |                    |
|                                           | TH                                 | NTH        | p-value          | TH                                                                  | NTH      | p-value          | TH                                                              | NTH      | p-value          | TH                                                                          | NTH      | p-value          | TH                                                                      | NTH     | p-value            |
| Inpatients; n                             | 6961                               | 13342      |                  | 1068                                                                | 1738     |                  | 438                                                             | 254      |                  | 693                                                                         | 1177     |                  | 55                                                                      | 28      |                    |
| Age; mean years (SD)                      | 45(17)                             | 43 (18)    | <b>&lt;0.001</b> | 53 (14)                                                             | 55 (15)  | <b>&lt;0.001</b> | 49 (17)                                                         | 51 (17)  | 0.222            | 36 (15)                                                                     | 35 (16)  | 0.387            | 37 (14)                                                                 | 40 (20) | 0.440              |
| Inpatients prescribed AB; n (%)           | 4540 (65)                          | 8900 (67)  | 0.034            | 392 (37)                                                            | 808 (47) | <b>&lt;0.001</b> | 299 (68)                                                        | 179 (71) | 0.545            | 569 (82)                                                                    | 831 (71) | <b>&lt;0.001</b> | 53 (96)                                                                 | 21 (75) | 0.006 <sup>a</sup> |
| Duration of hospital stay; mean days (SD) | 6 (5)                              | 3 (3)      | <b>&lt;0.001</b> | 6 (5)                                                               | 3 (3)    | <b>&lt;0.001</b> | 7 (5)                                                           | 4 (3)    | <b>&lt;0.001</b> | 4 (4)                                                                       | 3 (2)    | <b>&lt;0.001</b> | 5 (3)                                                                   | 4(2)    | 0.796              |
| Duration of AB treatment; mean days (SD)  | 6 (4)                              | 4 (2)      | <b>&lt;0.001</b> | 6 (4)                                                               | 4 (2)    | <b>&lt;0.001</b> | 7 (4)                                                           | 4 (2)    | <b>&lt;0.001</b> | 5 (3)                                                                       | 4 (2)    | <b>&lt;0.001</b> | 5 (2)                                                                   | 5(2)    | 0.419              |
| Total AB prescription; n                  | 35732                              | 41068      |                  | 2741                                                                | 3366     |                  | 2388                                                            | 855      |                  | 3210                                                                        | 3451     |                  | 316                                                                     | 128     |                    |
| Prescriptions per patient                 | 7.8                                | 4.6        |                  | 7                                                                   | 4        |                  | 8                                                               | 4.8      |                  | 5.6                                                                         | 4.2      |                  | 6                                                                       | 6.1     |                    |
| AB prescriptions by generic name; n (%)   | 2341 (7)                           | 685 (2)    | <b>&lt;0.001</b> | 175 (6)                                                             | 47 (1)   | <b>&lt;0.001</b> | 282 (12)                                                        | 46 (5)   | <b>&lt;0.001</b> | 61 (2)                                                                      | 52 (2)   | 0.214            | 19 (6)                                                                  | 5 (4)   | 0.374 <sup>a</sup> |
| Prescriptions of AB found in NLEMI; n (%) | 27640 (77)                         | 24683 (60) | <b>&lt;0.001</b> | -                                                                   | -        | -                | -                                                               | -        | -                | -                                                                           | -        | -                | -                                                                       | -       | -                  |

Abbreviations: AB: antibiotics, NTH: non-teaching hospital, SD: standard deviation, TH: teaching hospital. Significant p-values are shown in bold. Independent sample t-test was used to compare age, duration of hospital stay and duration of antibiotic treatment. Pearson chi-square was used to compare prescription details with expected value >5. <sup>a</sup>Fischer's exact test was used to compare expected values <5.

**Table 3: Class wise distribution of prescribed antibiotics in four selected diagnoses groups at one teaching and one non-teaching hospitals in Ujjain, India**

| Name of AB; ATC-code                                         | Group (a): Cardiovascular diseases                                  |           |                  |                                                                 |          |                  | Group (b): Malaria or Viral fever                                           |           |                  |                                                                         |         |                    |
|--------------------------------------------------------------|---------------------------------------------------------------------|-----------|------------------|-----------------------------------------------------------------|----------|------------------|-----------------------------------------------------------------------------|-----------|------------------|-------------------------------------------------------------------------|---------|--------------------|
|                                                              | Cardiovascular with no registered bacterial infection (Sub-group 1) |           |                  | Cardiovascular with suspected bacterial infection (Sub-group 2) |          |                  | Malaria or Viral Fever with no registered bacterial infection (Sub-group 3) |           |                  | Malaria or Viral Fever with suspected bacterial infection (Sub-group 4) |         |                    |
|                                                              | TH                                                                  | NTH       | p-value          | TH                                                              | NTH      | p-value          | TH                                                                          | NTH       | p-value          | TH                                                                      | NTH     | p-value            |
|                                                              | n (%)                                                               | n (%)     |                  | n (%)                                                           | n (%)    |                  | n (%)                                                                       | n (%)     |                  | n (%)                                                                   | n (%)   |                    |
| Total prescriptions                                          | 2741                                                                | 3366      |                  | 2388                                                            | 855      |                  | 3210                                                                        | 3451      |                  | 316                                                                     | 128     |                    |
| <b>Tetracyclines; J01A: J01AA</b>                            | 284 (10)                                                            | 5 (0)     | <b>&lt;0.001</b> | 243 (10)                                                        | 0 (0)    |                  | 553 (17)                                                                    | 75 (2)    | <b>&lt;0.001</b> | 83 (26)                                                                 | 0 (0)   |                    |
| <b>Beta-lactam ABs, penicillin; J01C</b>                     | 458 (17)                                                            | 498 (15)  | 0.041            | 622 (26)                                                        | 184 (22) | 0.009            | 111 (3)                                                                     | 245 (7)   | <b>&lt;0.001</b> | 12 (4)                                                                  | 7 (5)   | 0.431              |
| Extended-spectrum penicillins; J01CA                         | 83 (3)                                                              | 99 (3)    | 0.843            | 122 (5)                                                         | 99 (12)  | <b>&lt;0.001</b> | 19 (1)                                                                      | 51 (1)    | <b>&lt;0.001</b> | 0 (0)                                                                   | 2 (2)   |                    |
| Combination of penicillin incl. Beta-lactamase AB; J01CR     | 373 (14)                                                            | 399 (12)  | 0.040            | 500 (21)                                                        | 85 (10)  | <b>&lt;0.001</b> | 92 (3)                                                                      | 194 (6)   | <b>&lt;0.001</b> | 12 (4)                                                                  | 5 (4)   | 1.0 <sup>a</sup>   |
| <b>Other Beta-lactam; J01D</b>                               | 488 (18)                                                            | 1391 (41) | <b>&lt;0.001</b> | 353 (15)                                                        | 304 (36) | <b>&lt;0.001</b> | 665 (21)                                                                    | 1792 (52) | <b>&lt;0.001</b> | 40 (13)                                                                 | 39 (30) | <b>&lt;0.001</b>   |
| 1st gen. cephalosporins; J01DB                               | 7 (0)                                                               | 16 (1)    | 0.163            | 0 (0)                                                           | 5 (1)    |                  | 0 (0)                                                                       | 9 (0)     |                  | 0 (0)                                                                   | 0 (0)   |                    |
| 2nd gen. cephalosporins; J01DC                               | 0 (0)                                                               | 98 (3)    |                  | 0 (0)                                                           | 27 (3)   |                  | 0 (0)                                                                       | 168 (5)   |                  | 0 (0)                                                                   | 0 (0)   |                    |
| 3rd gen. cephalosporins; J01DD                               | 481 (18)                                                            | 1254 (37) | <b>&lt;0.001</b> | 353 (15)                                                        | 272 (32) | <b>&lt;0.001</b> | 665 (21)                                                                    | 1606 (47) | <b>&lt;0.001</b> | 40 (13)                                                                 | 39 (30) | <b>&lt;0.001</b>   |
| 4th gen. cephalosporins; J01DH                               | 8 (0)                                                               | 23 (1)    | 0.032            | 0 (0)                                                           | 0 (0)    |                  | 0 (0)                                                                       | 9 (0)     |                  | 0 (0)                                                                   | 0 (0)   |                    |
| <b>Sulfonamide with timethoprim; J01E: J01EE</b>             | 8 (0)                                                               | 0 (0)     |                  | 18 (1)                                                          | 0 (0)    |                  | 8 (0)                                                                       | 0 (0)     |                  | 0 (0)                                                                   | 0 (0)   |                    |
| <b>Macrolides, lincosamides J01F</b>                         | 16 (1)                                                              | 2 (0)     | <b>&lt;0.001</b> | 4 (0)                                                           | 6 (1)    | 0.025*           | 15 (0)                                                                      | 7 (0)     | 0.060            | 3 (1)                                                                   | 4 (3)   | 0.110 <sup>a</sup> |
| Macrolides; J01FA                                            | 12 (0)                                                              | 2         | 0.002            | 4 (0)                                                           | 6 (1)    |                  | 15 (0)                                                                      | 7 (0)     |                  | 3 (1)                                                                   | 4 (3)   |                    |
| Lincosamides; J01FF                                          | 4 (0)                                                               | 0 (0)     |                  | 0 (0)                                                           | 0 (0)    |                  | 0 (0)                                                                       | 0 (0)     |                  | 0 (0)                                                                   | 0 (0)   |                    |
| <b>Aminoglycoside; J01G: J01GB</b>                           | 78 (3)                                                              | 73 (2)    | 0.090            | 149 (6)                                                         | 46 (5)   | 0.364            | 17 (1)                                                                      | 60 (2)    | <b>&lt;0.001</b> | 11 (3)                                                                  | 9 (7)   | 0.102              |
| <b>Quinolones; J01M: J01MA</b>                               | 1031 (38)                                                           | 301 (9)   | <b>&lt;0.001</b> | 731 (31)                                                        | 112 (13) | <b>&lt;0.001</b> | 1526 (48)                                                                   | 464 (13)  | <b>&lt;0.001</b> | 126 (40)                                                                | 37 (29) | 0.030              |
| <b>Fixed dose combination of ABs; J01R: J01RA*</b>           | 12 (0)                                                              | 929 (28)  | <b>&lt;0.001</b> | 31 (1)                                                          | 170 (20) | <b>&lt;0.001</b> | 34 (1)                                                                      | 669 (19)  | <b>&lt;0.001</b> | 6 (2)                                                                   | 17 (13) | <b>&lt;0.01</b>    |
| <b>Other ABs; J01X</b>                                       | 167 (6)                                                             | 176 (5)   | 0.145            | 132 (6)                                                         | 30 (4)   | 0.020            | 149 (5)                                                                     | 138 (4)   | 0.197            | 20 (6)                                                                  | 15 (12) | 0.056              |
| Glycopeptide ABs; J01XA                                      | 15 (1)                                                              | 176 (5)   | <b>&lt;0.001</b> | 0 (0)                                                           | 0 (0)    |                  | 0 (0)                                                                       | 0 (0)     |                  | 0 (0)                                                                   | 0 (0)   |                    |
| Imidazole derivatives; J01XD                                 | 152 (6)                                                             | 0 (0)     |                  | 132 (6)                                                         | 30 (4)   | 0.020            | 149 (5)                                                                     | 137 (4)   | 0.176            | 20 (6)                                                                  | 15 (12) | 0.056              |
| Other ABs; J01XX                                             | 0 (0)                                                               | 0 (0)     |                  | 0 (0)                                                           | 0 (0)    |                  | 0 (0)                                                                       | 1 (0)     |                  | 0 (0)                                                                   | 0 (0)   |                    |
| <b>Drugs for treatment of tuberculosis; J04A</b>             | 0 (0)                                                               | 0 (0)     |                  | 24 (1)                                                          | 0 (0)    |                  | 0                                                                           | 0 (0)     |                  | 0 (0)                                                                   | 0 (0)   |                    |
| Antibiotics; J04AB (Treatment for Tuberculosis)              | 0 (0)                                                               | 0 (0)     |                  | 6 (0)                                                           | 0 (0)    |                  | 0 (0)                                                                       | 0 (0)     |                  | 0 (0)                                                                   | 0 (0)   |                    |
| Hydrazides; J04AC                                            | 0 (0)                                                               | 0 (0)     |                  | 6 (0)                                                           | 0 (0)    |                  | 0 (0)                                                                       | 0 (0)     |                  | 0 (0)                                                                   | 0 (0)   |                    |
| Other drugs for treatment of tuberculosis; J04AK             | 0 (0)                                                               | 0 (0)     |                  | 12 (1)                                                          | 0 (0)    |                  | 0 (0)                                                                       | 0 (0)     |                  | 0 (0)                                                                   | 0 (0)   |                    |
| <b>Nitromidazole derivatives; P01AB (Oral Metronidazole)</b> | 201 (7)                                                             | 0 (0)     |                  | 81 (3)                                                          | 3 (0)    | <b>&lt;0.001</b> | 132 (4)                                                                     | 1 (0)     | <b>&lt;0.001</b> | 15 (5)                                                                  | 0 (0)   |                    |

Abbreviations: n(%): Number of patients (percentage in antibiotic class), AB: antibiotics, ATC: WHO anatomic therapeutic chemical classification, NTH: non-teaching hospital, TH: teaching hospital. Significant p-values shown in bold. Pearson chi-square and <sup>a</sup>Fischer's exact test were used to compare antibiotic prescribing details, generation.

1  
2  
3 Third-generation cephalosporins (J01DD) constituted 47% and 30% of the prescriptions in  
4 sub-group 3 and 4 at the NTH, followed by FDCs (19% and 29% of the prescriptions  
5 respectively). Overall, antibiotic prescriptions were significantly more common for the  
6 patients in sub-group 3 than in the sub-group 1' ( $p < 0.001$ ). The type of malaria was verified  
7 by blood samples reports in some cases of sub-group 3 (TH: 4% and NTH: 7%). None of the  
8 records from the four sub-groups had requisition for sending samples for bacterial culture and  
9 susceptibility test.  
10  
11

12  
13  
14 Ciprofloxacin (J01MA02) was the most frequently prescribed antibiotic substance measured  
15 in DDD/1000 patients at the TH and ceftriaxone (J01DD04, Table 4) at the NTH. The highest  
16 number of prescribed DDDs/1000 patients was recorded for ciprofloxacin, followed by  
17 doxycycline and ceftriaxone in both hospitals (Figure 2).  
18  
19  
20  
21  
22  
23  
24  
25  
26  
27  
28  
29  
30  
31  
32  
33  
34  
35  
36  
37  
38  
39  
40  
41  
42  
43  
44  
45  
46  
47  
48  
49  
50  
51  
52  
53  
54  
55  
56  
57  
58  
59  
60



**Table 4: Most commonly prescribed antibiotics among the selected diagnoses groups presenting the prescribing occasions in DDDs/1000 patients at sixth level of the ATC classification**

| Name; ATC-code                         | Group (a): Cardiovascular diseases                                           |            |                                                                          |                          | Group (b): Malaria or Viral fever                                                    |                          |                                                                                  |            |
|----------------------------------------|------------------------------------------------------------------------------|------------|--------------------------------------------------------------------------|--------------------------|--------------------------------------------------------------------------------------|--------------------------|----------------------------------------------------------------------------------|------------|
|                                        | Cardiovascular with no registered bacterial infection<br>(Sub-group 1) n (%) |            | Cardiovascular with suspected bacterial infection<br>(Sub-group 2) n (%) |                          | Malaria or Viral Fever with no registered bacterial infection<br>(Sub-group 3) n (%) |                          | Malaria or Viral Fever with suspected bacterial infection<br>(Sub-group 4) n (%) |            |
|                                        | TH                                                                           | NTH        | TH                                                                       | NTH                      | TH                                                                                   | NTH                      | TH                                                                               | NTH        |
| Total DDDs/1000 patients               | 2062 (99)                                                                    | 1456 (100) | 4514 (99)                                                                | 3421 (100 <sup>#</sup> ) | 4480 (100 <sup>#</sup> )                                                             | 3048 (100 <sup>#</sup> ) | 5432 (100 <sup>#</sup> )                                                         | 5827 (100) |
| Doxycycline, J01AA02                   | 491 (24)                                                                     |            | 1030 (23)                                                                |                          | 1463 (33)                                                                            | 296 (10)                 | 2745 (51)                                                                        |            |
| Ampicillin, J01CA01                    | 68 (3)                                                                       |            | 170 (4)                                                                  |                          |                                                                                      |                          |                                                                                  |            |
| Amoxicillin, J01CA04                   |                                                                              | 81 (6)     |                                                                          | 435 (13)                 |                                                                                      |                          |                                                                                  |            |
| Amoxicillin + Clavulanic acid, J01CR02 |                                                                              |            |                                                                          | 566 (17)                 |                                                                                      | 88 (3)                   |                                                                                  |            |
| Piperacillin + Tazobactam, J01CR05     |                                                                              |            |                                                                          |                          |                                                                                      | 34 (1)                   |                                                                                  |            |
| Ampicillin + Cloxacillin, J01CR50      | 217 (11)                                                                     |            | 774 (17)                                                                 |                          |                                                                                      |                          | 191 (4)                                                                          |            |
| Cefuroxime, J01DC02                    |                                                                              |            |                                                                          | 95 (3)                   |                                                                                      | 136 (4)                  |                                                                                  |            |
| Cefprozil, J01DC10                     |                                                                              | 75 (5)     |                                                                          |                          |                                                                                      |                          |                                                                                  |            |
| Cefotaxime, J01DD01                    | 172 (8)                                                                      | 46 (3)     | 298 (7)                                                                  | 59 (2)                   | 199 (4)                                                                              | 96 (3)                   | 295 (5)                                                                          |            |
| Ceftriaxone, J01DD04                   | 133 (6)                                                                      | 558 (38)   | 244 (5)                                                                  | 907 (27)                 | 560 (13)                                                                             | 1052 (35)                | 164 (3)                                                                          | 1402 (24)  |
| Azithromycin, J01FA10                  |                                                                              |            |                                                                          |                          |                                                                                      |                          |                                                                                  | 476 (8)    |
| Gentamicin, J01GB03                    | 44 (2)                                                                       |            | 167 (4)                                                                  | 81 (2)                   |                                                                                      |                          |                                                                                  |            |
| Amikacin, J01GB06                      |                                                                              |            |                                                                          |                          |                                                                                      |                          |                                                                                  | 321 (6)    |
| Ofloxacin, J01MA01                     |                                                                              |            |                                                                          |                          |                                                                                      | 202 (7)                  |                                                                                  |            |
| Ciprofloxacin, J01MA02                 | 687 (33)                                                                     | 141 (10)   | 1057 (23)                                                                | 527 (15)                 | 1940 (43)                                                                            | 602 (20)                 | 1185 (22)                                                                        | 2886 (50)  |
| Norfloxacin, J01MA06                   |                                                                              |            | 201 (4)                                                                  |                          |                                                                                      |                          | 273 (5)                                                                          |            |
| Levofloxacin, J01MA12                  |                                                                              | 73 (5)     | 202 (4)                                                                  | 129 (4)                  |                                                                                      |                          | 145 (3)                                                                          |            |
| Cefoperazone + Sulbactam, J01RA*83     |                                                                              | 92 (6)     |                                                                          | 94 (3)                   |                                                                                      | 90 (3)                   |                                                                                  | 125 (2)    |
| Ceftriaxone + Sulbactam, J01RA*84      |                                                                              | 228 (16)   |                                                                          | 277 (8)                  |                                                                                      | 199 (7)                  |                                                                                  |            |
| Ceftriaxone + Tazobactam, J01RA*85     |                                                                              | 162 (11)   |                                                                          | 156 (5)                  |                                                                                      | 162 (5)                  |                                                                                  | 250 (4)    |
| Metronidazole, J01XD01                 | 139 (7)                                                                      |            | 262 (6)                                                                  | 95 (3)                   | 204 (5)                                                                              | 91 (3)                   | 262 (5)                                                                          | 367 (6)    |
| Metronidazole, P01AB01 (Oral)          | 111 (5)                                                                      |            | 109 (2)                                                                  |                          | 114 (3)                                                                              |                          | 172 (3)                                                                          |            |

Abbreviations: n (%): Number of patients (percentage), AB: antibiotics, DDD: Defined Daily Dose, NTH: non-teaching hospital, TH: teaching hospital, <sup>#</sup> rounding off the percentages to nearest integer made the total more than 100%

1  
2  
3 **Figure 2. Top 90% of prescription in the four selected groups measured in DDD/1000 patients,**  
4 **presented at fourth level of the ATC classification at one teaching and one non-teaching**  
5 **hospitals in Ujjain, India**  
6

## 7 **DISCUSSION**

8  
9 To our knowledge this study is the first to investigate and present antibiotic prescription  
10 practices at medicine departments in Indian private sector hospitals by focusing on non-  
11 bacterial infectious diseases. This also leads to a limitation, as the results of the present study  
12 could not be compared with the findings of any other study. Thus the results of present study  
13 were compared with the most equivalent studies available globally.  
14  
15

16  
17  
18  
19  
20 Antibiotics were commonly prescribed to inpatients at both study hospitals. Irrespective of the  
21 indications, broad-spectrum antibiotics and third-generation cephalosporins that should be  
22 conserved for high risks co-morbidities and life-threatening bacterial infections were  
23 prescribed frequently. This study also highlights the high rates of antibiotic prescriptions used  
24 to treat the selected groups of non-bacterial infectious diseases such as cardiovascular disease,  
25 malaria, and viral fever.  
26  
27  
28  
29  
30  
31  
32

### 33 **Antibiotic prescriptions in the cardiovascular and fever groups**

34  
35  
36 The average percentage of patients that were prescribed antibiotics in the medicine  
37 departments were similar (TH: 65% and NTH: 67%,  $p < 0.001$ ) in comparison to the rates in  
38 the medicine department of a public hospital at Bathalapalli, Andhra Pradesh, India  
39 (63%),[26]. With a few exceptions, such as rheumatic fever, endocarditis, pericarditis and  
40 myocarditis (bacterial or viral), cardiovascular diseases are primarily non-infectious. COPD  
41 and RHD are the common associated diseases in cardiovascular patients. Rheumatic fever is  
42 an immune response sequel to an infection and it may cause endocarditis,[23,27]. However,  
43 pericarditis and myocarditis most commonly develop from viral pathogens where antibiotic  
44 treatment is not a routine recommendation,[28,29].  
45  
46  
47  
48  
49  
50  
51  
52  
53  
54  
55  
56  
57  
58  
59  
60

1  
2  
3 Interestingly, more than 35% of inpatients among the 'cardiovascular group with no registered  
4 bacterial infection' were prescribed antibiotics at both hospitals. As per treatment guidelines  
5 and recommendations, only patients who have confirmed infectious diagnosis are expected to  
6 receive an antibiotic prescription,[30–32]. Nonetheless, empirical or presumptive antibiotic  
7 therapy is also accepted when the clinical diagnosis, based on the presence of a strong clinical  
8 suspicion of bacterial infection, is substantiated by relevant medical history and clinical  
9 findings,[30]. According to the WHO and the Indian National Treatment Guidelines for  
10 Antimicrobial Use; presumptive therapy is typically a one-time treatment given for clinically  
11 presumed infection while waiting for the culture report,[31,32]. In combination of clinical  
12 findings laboratory and radiological reports are considered to confirm the diagnosis and lead  
13 to the definitive therapy,[32].  
14  
15  
16  
17  
18  
19  
20  
21  
22  
23  
24  
25  
26  
27  
28

29 Microbiology laboratories were highly under-utilized in both study hospitals. None of the  
30 patient records in the selected four sub-groups included notes about sending samples for  
31 culture and susceptibility testing. Therefore, the practice of prescribing antibiotics to the  
32 patient groups with no registered bacterial infection in absence of laboratory confirmation  
33 could not be considered to be rational. Among the COPD and RHD patients the aetiology of  
34 the current episode of hospitalization could potentially be expected to be non-bacterial (e.g.  
35 viral infection). However, this could not be confirmed due to the absence of laboratory  
36 investigations. It is worth mentioning here that prolonged empiric antibiotic treatment without  
37 a clear evidence of infection is one of the causes of the development of antibiotic resistance.  
38  
39  
40  
41  
42  
43  
44  
45  
46  
47  
48

49 More FDCs were prescribed to the cardiovascular patients at the NTH than at the TH.  
50 Rationality of the newer FDCs coded with ATC-code: J01RA\* has not been established yet  
51 and these combinations are not listed in either the NLEMI or the WHOLEM,[18,19]. It is also  
52  
53  
54  
55  
56  
57  
58  
59  
60

1  
2  
3 evident that the constituents of these combinations are often present in lower quantities than is  
4 recommended which might lead to the development of antibiotic resistance,[33].  
5  
6

7  
8 The sub-group 'malaria or viral fever with suspected bacterial infection' was found to have the  
9 highest rate of antibiotic prescriptions among all the four sub-groups (TH: 96%, NTH: 75%).  
10  
11 Our result also highlight that patients with fever were more likely to receive antibiotic  
12 prescriptions, than patients with cardiovascular diseases. Fever is a common symptom among  
13 malaria, viral fever and bacterial infection. Therefore, the doctors might have prescribed  
14 antibiotics as a 'prophylactic' treatment to treat bacterial infection, if any. In our study the rate  
15 of antibiotic prescriptions for the patients with fever was higher than, yet comparable with a  
16 study at primary and secondary health care settings in Uttar Pradesh, India where 85% of the  
17 fever patients were prescribed antibiotics,[34]. Additionally, in our study a high percentage of  
18 patients with fever (malaria or viral fever) with 'no registered bacterial infection' were  
19 prescribed antibiotics (TH: 82%, NTH: 71%). An out-patient study from Uganda, a malaria  
20 endemic country, showed that 42% of malaria patients were prescribed antibiotics without  
21 any registered indication,[25]. As the majority of the prescriptions in our study were  
22 empirical, the rationale for using the antibiotics cannot be evaluated. However, prescribing  
23 antibiotics to treat non-bacterial infections is considered to be an irrational practice. Thus it is  
24 imperative that this matter be addressed.  
25  
26  
27  
28  
29  
30  
31  
32  
33  
34  
35  
36  
37  
38  
39  
40  
41  
42

#### 43 44 **Adherence to the essential medicine lists and prescriptions by generic name**

45  
46 A higher proportion of prescribed antibiotics at the TH (77%) were from the NLEMI  
47 compared with the NTH (60%,  $p < 0.001$ ). This could be attributed to the presence of a  
48 management policy to purchase and supply medicines at the TH. However, there is a need to  
49 improve adherence to the NLEMI at both hospitals. According to WHO, prescribing by their  
50 generic name is; part of rational prescribing, cost effective and provides flexibility to buy the  
51  
52  
53  
54  
55  
56  
57  
58  
59  
60

1  
2  
3 available medicine of any company. This policy is equally applicable for both public and  
4  
5 private healthcare settings. However, adherence to this policy is higher at public hospitals,  
6  
7 followed by 'private non-profit' hospitals and by the 'private for-profit' hospitals,[13,14,35]. In  
8  
9 the present study, significantly lower antibiotic prescriptions were made by generic names to  
10  
11 the patients of sub-group 1 (TH: 6%, NTH: 1%  $p<0.001$ ) or sub-group 2 (TH: 12% NTH: 5%  
12  
13  $p<0.001$ ) at the NTH than at the TH. Third-generation cephalosporins (J01D, 29%) and FDCs  
14  
15 (J01RA\*, 23%) were the most commonly prescribed classes of antibiotics at the NTH while  
16  
17 quinolones were most commonly prescribed at the TH (J01M, 37%, NTH: 13%). Previous  
18  
19 studies from Uttar Pradesh, India and Madhya Pradesh, India have also shown similar results  
20  
21 for academic and non-academic hospitals,[13,14,17]. The high incidence of prescribing these  
22  
23 classes is further supported by Van Boeckel et al, who observed a significant increase in the  
24  
25 consumption of fluoroquinolones and cephalosporins globally over the past decade. This  
26  
27 increase was mainly attributed to the increased rates in India and China,[9]. At the NTH,  
28  
29 prescriptions of FDCs varied between 19% and 28% among the selected sub-groups (TH:  
30  
31  $<2\%$ ) and the prescriptions of third-generation cephalosporins varied between 30% and 47%  
32  
33 (TH:  $<22\%$ ). According to WHO, prescribing multiple antibiotics when not indicated, often  
34  
35 combined in inadequate doses (smaller or larger quantity than recommended) and prescription  
36  
37 of drugs other than local or national guidelines are all examples of actions deemed  
38  
39 inappropriate,[36]. All these practices could be seen in prescribing newer FDCs (J01RA\*);  
40  
41 both of the study hospitals are from the private sector and are regulated by the same trust on a  
42  
43 'not for-profit' basis. The differences in the prescribing practices might be due to each  
44  
45 hospital's policy and the fact that academic hospitals are part of the educational process, and  
46  
47 regular educational activities conducted at these hospitals results in better adherence to the  
48  
49 guidelines, as seen at the TH. Another reason for the frequent prescribing of broad-spectrum  
50  
51 antibiotics, new FDCs and use of trade names at the NTH could be explained by the results of  
52  
53  
54  
55  
56  
57  
58  
59  
60

1  
2  
3 a review conducted by Blumenthal et al,[37]. That review concluded that physicians who had  
4 received gifts or money from pharmaceutical companies were more likely to prescribe drugs  
5 produced by the brand names and less prone to use the generic names. The pressure from  
6 pharmaceutical companies could be anticipated on the doctors at the NTH, due to unrestricted  
7 visits from pharmaceutical company representatives,[37]. Moreover, these new FDCs of  
8 antibiotics are more expensive than the regular and generic formulations,[13,14,37]. The  
9 restriction of these visits and the management control over the purchase and supply of  
10 medicines can be seen as main reasons for low incidence of prescribing FDCs prescribing and  
11 high use of generic names at the TH.  
12  
13  
14  
15  
16  
17  
18  
19  
20  
21  
22

23 Interestingly trade names were used as local abbreviations to prescribe four most commonly  
24 prescribed antibiotics; ciprofloxacin, doxycycline, gentamycin and metronidazole at the TH,  
25 as discussed in result section. However, only generic drugs were purchased and dispensed at  
26 the TH due to administrative control over the purchase and supply of the drugs. Thus even if  
27 these antibiotics were prescribed using an abbreviation similar to the trade name, they were  
28 included in adherence to the generic name prescribing category.  
29  
30  
31  
32  
33  
34  
35  
36

### 37 **Duration of hospital stay and duration of antibiotic treatment**

38  
39  
40 In the present study both the duration of hospital stay and the duration of antibiotic treatment  
41 were longer at the TH than the NTH among all inpatients groups. This could be due to the fact  
42 that the patients at the TH received free healthcare services and drugs, making their stay  
43 economically feasible. In contrast, at the NTH the patients had to pay for all the services and  
44 drugs they received. This association of longer duration of stay and antibiotic treatment at TH  
45 has also been observed in previous studies from India,[13,14,17]. However, it is evident that  
46 the treatment given for a time period that is either shorter or longer than recommended, is  
47  
48  
49  
50  
51  
52  
53  
54  
55  
56  
57  
58  
59  
60

1  
2  
3 inappropriate and it substantially contributes to the development of antibiotic  
4  
5 resistance,[1,36].  
6  
7

## 8 9 **STRENGTHS AND LIMITATIONS**

10  
11  
12 A high number of patients were screened over a three year period this overcomes seasonal  
13  
14 variations in infectious aetiology which would affect antibiotic prescribing. Same form was  
15  
16 used for the data collection and the process was supervised and monitored by same person at  
17  
18 both hospitals to improve the reliability of the data. The diagnoses were not verified  
19  
20 externally being a limitation of the study. However, external verification is virtually  
21  
22 inapplicable to studies that rely upon the routine collection of data. The results of the study  
23  
24 were based on the notes included in the patient files. Extensive efforts were made to  
25  
26 document all notes including diagnoses written in the patient files. However, the possibility of  
27  
28 missing a few diagnoses and losing some data during the transition from the forms to the  
29  
30 digital storage cannot be excluded.  
31  
32  
33  
34

## 35 **CONCLUSION**

36  
37  
38 A higher number of prescribing occasions were recorded at the TH, and not at the NTH, with  
39  
40 regard to adherence to the guidelines. However, overall adherence was low. Fever was a risk  
41  
42 factor to receive antibiotic prescription at both hospitals. Patients with non-bacterial infections  
43  
44 such as malaria or viral fever or with cardiovascular diseases were prescribed antibiotics at  
45  
46 both medicine departments which could not be justified. Broad spectrum antibiotics with  
47  
48 irrational combinations of antibiotics were commonly prescribed in the study hospitals for  
49  
50 non-indicated conditions. A large proportion of patients were categorised as suspected  
51  
52 bacterial diagnoses (sub-groups 2 and 4). In the presence of confirmed aetiology, according to  
53  
54 microbiology reports, some of these could have been categorised in non-bacterial group and  
55  
56 could have contributed to higher antibiotic prescribing rates in the non-bacterial diagnoses  
57  
58  
59  
60

1  
2  
3 (sub-groups 1 and 3). However, this was unavoidable due to absence of confirmed aetiology  
4  
5 and the nature of the study design (observational).  
6  
7

## 8 **GENERALISABILITY AND FUTURE IMPLICATIONS**

9  
10 The data collection method used in the study is robust and reliable. In accordance with one of  
11  
12 the WHO goals of "Global-action-plan" and in view of limited knowledge of antibiotic  
13  
14 utilization and resistance patterns our study findings suggest that there is a need to conduct  
15  
16 and share similar long term surveillance studies globally. The data collection method and  
17  
18 tested tool used in the study could easily be adapted in other settings that lack computerized  
19  
20 patient records. The management in the TH had a policy to control the purchase and supply of  
21  
22 medicines. This control shows positive effects at the TH compared to the NTH; to minimise  
23  
24 antibiotic prescribing, in better adherence to the NLEMI and in use of generic names. This  
25  
26 control could be implemented and tested in other constrained settings. The recruitment of  
27  
28 nursing staff for manual data collection who routinely work in the department would have  
29  
30 helped to minimize the influence on the prescribers. High prescribing rates of antibiotics and  
31  
32 use of FDCs among inpatients in these settings could broadly be considered as representative  
33  
34 for similar health care settings in low-middle income countries. Lack of culture of sending  
35  
36 cultures is another important issue raised by the study. The need to develop and implement  
37  
38 local diagnosis specific prescribing guidelines in conjugation with continuous follow-up is  
39  
40 also emphasized by our study. The physicians should be motivated to send samples for  
41  
42 cultures before prescribing antibiotics. Improving hygiene practices is another  
43  
44 recommendation to prevent spread of infection and to decrease in the 'prophylactic' use of  
45  
46 antibiotics.  
47  
48  
49  
50  
51

## 52 **CONTRIBUTERSHIP STATEMENT**



1  
2  
3 MS and CSL designed, visualized the research question and developed the data collection  
4  
5 tool. MS conducted repeated training sessions for nursing personal for recording the data. MS  
6  
7 was also responsible for coordination with the nursing staff, monitoring and supervision of the  
8  
9 data collection and entry. CSL participated in planning the study design and the coordination  
10  
11 of the study. KL, CSL and MS participated in the conception and design of the present study  
12  
13 and revising the paper critically for substantial intellectual content. KL grouped and analyzed  
14  
15 the data, performed the statistical analysis and contributed in drafting the manuscript along  
16  
17 with MS, CSL, FJ and AS. KL, AS and MS were responsible for categorization of the  
18  
19 patients. All authors read and approved the final version of the manuscript.  
20  
21

## 22 23 **COMPETING INTERESTS**

24  
25  
26 The authors have no competing interests to declare.  
27  
28

## 29 **FUNDING**

30  
31  
32 This study was supported by the Swedish Research Council (K2007-70X-20514-01-3) and  
33  
34 Asia Link (348-2006-6633). KL and FJ both received scholarships from Sida to visit the study  
35  
36 settings and perform the study. MS is a recipient of a scholarship from Erasmus Mundus  
37  
38 External Cooperation Window Lot-15, India.  
39  
40

## 41 42 **ACKNOWLEDGEMENT**

43  
44  
45 The authors are thankful to all nurses and the management of both hospitals for their support  
46  
47 and help during the study.  
48  
49

## 50 51 **DATA SHARING STATEMENT**

52  
53  
54 As per the institutional policy, the data is available with the Institutional ethics committee.  
55  
56 This is to protect the patient's confidentiality and to ensure the electronic security of the data.  
57  
58  
59  
60

1  
2  
3 The data could be made available to all interested researchers upon request made to; The  
4  
5 Chairman, Ethics Committee, R.D. Gardi Medical College, Agar Road, Ujjain, Madhya  
6  
7 Pradesh, India 456006 (Email: iccrdgmcc@yahoo.in, uchtharc@sancharnet.in), giving all details  
8  
9 of the article. The ethical approval number: 41/2007 needs to be quoted along with the  
10  
11 request.  
12  
13

## 14 15 16 17 18 REFERENCES

- 19  
20  
21 1. World Health Organization. The evolving threat of antimicrobial resistance: Options  
22 for action. WHO Publications. Geneva; 2014;  
23 [http://whqlibdoc.who.int/publications/2012/9789241503181\\_eng.pdf](http://whqlibdoc.who.int/publications/2012/9789241503181_eng.pdf)(accessed 2016  
24 Sep 15)  
25
- 26  
27 2. World Health Organization. The top 10 causes of death. Geneva; 2014;  
28 <http://www.who.int/mediacentre/factsheets/fs310/en/>(accessed 2016 Sep 15)  
29
- 30  
31 3. Global Antibiotic Resistance Partnership (GARP) India Working Group. Rationalizing  
32 antibiotic use to limit antibiotic resistance in India. *Indian J Med Res.* 2011.134:281–  
33 94.
- 34  
35 4. Bhutta Z a, Sommerfeld J, Lassi ZS, et al. Global burden, distribution, and  
36 interventions for infectious diseases of poverty. *Infect Dis poverty.* 2014.3(1):21.  
37
- 38  
39 5. Global Antibiotic Resistance Partnership (GARP) India Working Group. Antibiotic  
40 Use and Resistance in India. New Dehli; 2011;  
41 [http://www.cddep.org/publications?page=1&f\[0\]=field\\_region:13](http://www.cddep.org/publications?page=1&f[0]=field_region:13)(accessed 2016 Sep  
42 15)  
43
- 44  
45 6. World Health Organization. Disease and injury country estimates: Burden of disease.  
46 Geneva;  
47 [http://www.who.int/healthinfo/global\\_burden\\_disease/estimates\\_country/en/index.html](http://www.who.int/healthinfo/global_burden_disease/estimates_country/en/index.html)  
(accessed 2016 Sep 16)  
48
- 49  
50 7. Kumar SG, Adithan C, Harish BN, et al. Antimicrobial resistance in India: A review. *J*  
51 *Nat Sci Biol Med.* 2013.4(2):286–91.
- 52  
53 8. Wilcox MH, Freeman J, Fawley W, et al. Long-term surveillance of cefotaxime and  
54 piperacillin – tazobactam prescribing and incidence of *Clostridium difficile* diarrhoea.  
55 *J Antimicrob Chemother.* 2004.54(1):168–72.  
56  
57  
58  
59  
60

- 1  
2  
3 9. Van Boeckel TP, Gandra S, Ashok A, et al. Global antibiotic consumption 2000 to  
4 2010: An analysis of national pharmaceutical sales data. *Lancet Infect Dis*.  
5 2014.14:742–50.  
6
- 7  
8 10. The World Bank. World development indicators, GNI per capita, Atlas method. 2015;  
9 <http://data.worldbank.org/indicator/NY.GNP.PCAP.CD>(accessed 2016 Sep 15)
- 10  
11 11. De Costa A, Diwan V. “Where is the public health sector?”. Public and private sector  
12 healthcare provision in Madhya Pradesh, India. *Health Policy (New York)*.  
13 2007.84:269–76.  
14
- 15 12. Sekher T V. Catastrophic Health Expenditure and Poor in India : Health Insurance is  
16 the Answer ? Vol. 494, SAGE-India. 2011; p. 1–4.  
17 <http://iussp.org/en/event/17/programme/paper/4043>)  
18
- 19 13. Sharma M, Damlin AL, Sharma A, et al. Antibiotic prescribing in medical intensive  
20 care units – a comparison between two private sector hospitals in Central India. *Infect*  
21 *Dis (Auckl)*. Elsevier Ltd; 2015.14(8):1–8.  
22  
23
- 24 14. Sharma M, Damlin A, Pathak A, et al. Antibiotic Prescribing among Pediatric  
25 Inpatients with Potential Infections in Two Private Sector Hospitals in Central India.  
26 *PLoS One*. 2015.10.  
27 <http://journals.plos.org/plosone/article?id=10.1371/journal.pone.0142317>  
28
- 29 15. WHO Int WG for Drug Statistics Methodology. Introduction to Drug Utilization  
30 Research. Oslo; 2003; p. 1–48.  
31 [http://www.whocc.no/filearchive/publications/drug\\_utilization\\_research.pdf](http://www.whocc.no/filearchive/publications/drug_utilization_research.pdf)(accessed  
32 2016 Sep 16)  
33  
34
- 35 16. WHOCC. ATC/DDD Index. 2015; [http://www.whocc.no/atc\\_ddd\\_index/](http://www.whocc.no/atc_ddd_index/)(accessed  
36 2015 Mar 13)  
37
- 38 17. Sharma M, Eriksson B, Marrone G, et al. Antibiotic prescribing in two private sector  
39 hospitals; one teaching and one non-teaching: A cross-sectional study in Ujjain, India.  
40 *BMC Infect Dis*. 2012.12:155.  
41  
42
- 43 18. Organization CDSC. National List of Essential Medicines. New Dehli; 2011;  
44 <http://apps.who.int/medicinedocs/documents/s18693en/s18693en.pdf>(accessed 2016  
45 Sep 16)  
46
- 47 19. World Health Organization. Model List of Essential Medicines. Geneva; 2013; p. 1–43.  
48 [http://www.who.int/medicines/publications/essentialmedicines/18th\\_EML\\_Final\\_web\\_](http://www.who.int/medicines/publications/essentialmedicines/18th_EML_Final_web_8Jul13.pdf)  
49 [8Jul13.pdf](http://www.who.int/medicines/publications/essentialmedicines/18th_EML_Final_web_8Jul13.pdf)(accessed 2016 Sep 16)  
50
- 51  
52 20. World Health Organization. The international statistical classification of diseases and  
53 health related problems, ICD-10. Malta: World Health Organization; 2012;  
54
- 55 21. World Health Organization. International Statistical Classification of Diseases and  
56 Related Health Problems 10th Revision (ICD-10) Version for 2010.  
57 <http://apps.who.int/classifications/icd10/browse/2010/en>  
58  
59  
60

- 1
  - 2
  - 3
  - 4
  - 5
  - 6
  - 7
  - 8
  - 9
  - 10
  - 11
  - 12
  - 13
  - 14
  - 15
  - 16
  - 17
  - 18
  - 19
  - 20
  - 21
  - 22
  - 23
  - 24
  - 25
  - 26
  - 27
  - 28
  - 29
  - 30
  - 31
  - 32
  - 33
  - 34
  - 35
  - 36
  - 37
  - 38
  - 39
  - 40
  - 41
  - 42
  - 43
  - 44
  - 45
  - 46
  - 47
  - 48
  - 49
  - 50
  - 51
  - 52
  - 53
  - 54
  - 55
  - 56
  - 57
  - 58
  - 59
  - 60
22. Enzler MJ, Berbari E, Osmon DR. Antimicrobial prophylaxis in adults. *Mayo Clin Proc.* 2011.86(1):686–701. <http://dx.doi.org/10.4065/mcp.2011.0012>
23. Bisno A, Butchart EG, Ganguly NK, et al. Rheumatic Fever and Rheumatic Heart Disease. *Who Tech Rep Ser.* 2001.923:1–122.
24. World Health Organization. Guidelines for the treatment of malaria, 2nd edition. Geneva; 2010; p. 197p. [http://whqlibdoc.who.int/publications/2010/9789241547925\\_eng.pdf](http://whqlibdoc.who.int/publications/2010/9789241547925_eng.pdf)(accessed 2015 Mar 13)
25. Means AR, Weaver MR, Burnett SM, et al. Correlates of inappropriate prescribing of antibiotics to patients with malaria in Uganda. *PLoS One.* 2014.9(2):1–7.
26. Alvarez-uria G, Zachariah S, Thomas D. High prescription of antimicrobials in a rural district hospital in India. *Pharm Pr.* 2014.12(2):1–4.
27. Habib G, Hoen B, Tornos P, et al. Guidelines on the prevention, diagnosis, and treatment of infective endocarditis. *Eur Heart J.* 2009.30:2369–413.
28. Maisch B, Seferović PM, Ristić AD, et al. Guidelines on the Diagnosis and Management of Pericardial Diseases: Executive Summary. Vol. 25, *European Heart Journal.* 2004; p. 587–610.
29. Schultheiss HP, Khl U, Cooper LT. The management of myocarditis. *Eur Heart J.* 2011.32:2616–25.
30. National centre for disease Control India. India National Treatment Guidelines for Antimicrobial Use in Infectious Diseases. Vol. 0. New Dehli; 2016; p. 1–64. [http://www.ncdc.gov.in/writereaddata/linkimages/AMR\\_guideline7001495889.pdf](http://www.ncdc.gov.in/writereaddata/linkimages/AMR_guideline7001495889.pdf)
31. Bennet JE, Dolin R, Blaser MJ. Madell, Douglas and Bennet’s Principles and Practice of Infectious Diseases. 8th ed. Philadelphia: Saunders; 2014;
32. Davey P, Wilcox M, Irwing W, et al. Antimicrobial Chemotherapy. 7th ed. Oxford: Oxford University Press; 2015;
33. Tripathi K. Essentials of Medical Pharmacology. Antimicrobial Drugs. 6th edition. 6th ed. New Dehli: Jaypee Brothers Medical Publishers; 2012;
34. Kumar R, Indira K, Rizvi a., et al. Antibiotic prescribing practices in primary and secondary health care facilities in Uttar Pradesh, India. *J Clin Pharm Ther.* 2008.33:625–34.
35. Pitaknetinan K, Tangcharoensathien V, Supachutikul a, et al. Profit, payment and pharmaceutical practices: perspectives from hospitals in Bangkok. *Health Policy.* 1999.46:179–94. <http://www.ncbi.nlm.nih.gov/pubmed/10351667>
36. Who. Promoting rational use of medicines: core components. *WHO Policy Perspect Med.* 2002.:1–6. <http://apps.who.int/medicinedocs/pdf/h3011e/h3011e.pdf>

1  
2  
3  
4  
5  
6  
7  
8  
9  
10  
11  
12  
13  
14  
15  
16  
17  
18  
19  
20  
21  
22  
23  
24  
25  
26  
27  
28  
29  
30  
31  
32  
33  
34  
35  
36  
37  
38  
39  
40  
41  
42  
43  
44  
45  
46  
47  
48  
49  
50  
51  
52  
53  
54  
55  
56  
57  
58  
59  
60

37. Blumenthal D. Doctors and Drug Companies. *N Engl J Med.* 2004.351:1885–7.

For peer review only

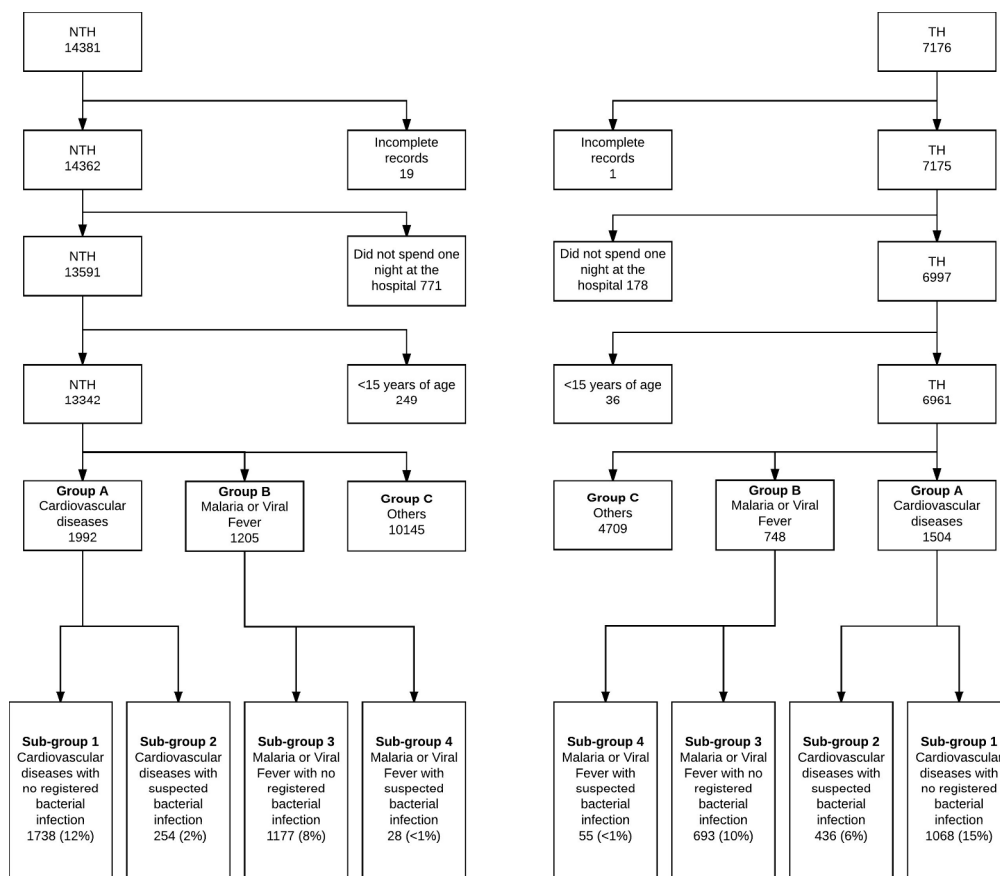

Figure 1. The process of selection and grouping of inpatients admitted in medicine departments of the TH and the NTH based on their diagnosis.

Figure 1. The process of selection and grouping of inpatients admitted in medicine departments of the TH and the NTH based on their diagnosis.

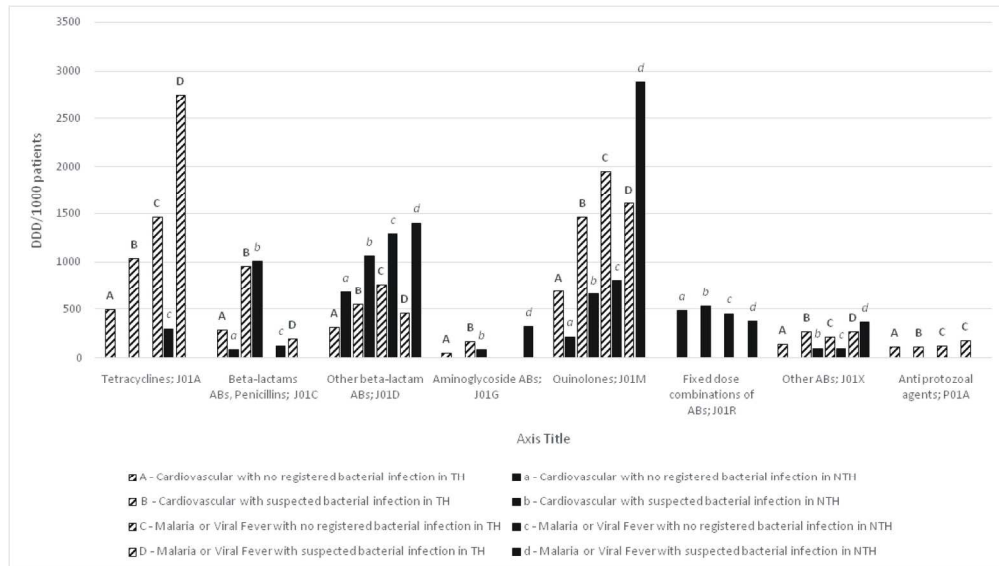

Figure 2. Top 90% of prescription in the four selected groups measured in DDD/1000 patients, presented at fourth level of the ATC classification at one teaching and one non-teaching hospitals in Ujjain, India

Figure 2. Top 90% of prescript  
91x51mm (600 x 600 DPI)

## STROBE Statement—checklist of items that should be included in reports of observational studies

|                           | Item No | Recommendation                                                                                                                                                                             | Page number |
|---------------------------|---------|--------------------------------------------------------------------------------------------------------------------------------------------------------------------------------------------|-------------|
| <b>Title and abstract</b> | 1       | (a) Indicate the study's design with a commonly used term in the title or the abstract                                                                                                     | 1           |
|                           |         | (b) Provide in the abstract an informative and balanced summary of what was done and what was found                                                                                        | 2-3         |
| <b>Introduction</b>       |         |                                                                                                                                                                                            |             |
| Background/rationale      | 2       | Explain the scientific background and rationale for the investigation being reported                                                                                                       | 5           |
| Objectives                | 3       | State specific objectives, including any pre specified hypotheses                                                                                                                          | 6           |
| <b>Methods</b>            |         |                                                                                                                                                                                            |             |
| Study design              | 4       | Present key elements of study design early in the paper                                                                                                                                    | 6           |
| Setting                   | 5       | Describe the setting, locations, and relevant dates, including periods of recruitment, exposure, follow-up, and data collection                                                            | 6           |
| Participants              | 6       | (a) <i>Cohort study</i> —Give the eligibility criteria, and the sources and methods of selection of participants. Describe methods of follow-up                                            | 7           |
|                           |         | <i>Case-control study</i> —Give the eligibility criteria, and the sources and methods of case ascertainment and control selection. Give the rationale for the choice of cases and controls |             |
|                           |         | <i>Cross-sectional study</i> —Give the eligibility criteria, and the sources and methods of selection of participants                                                                      |             |
|                           |         | (b) <i>Cohort study</i> —For matched studies, give matching criteria and number of exposed and unexposed                                                                                   |             |
|                           |         | <i>Case-control study</i> —For matched studies, give matching criteria and the number of controls per case                                                                                 |             |
| Variables                 | 7       | Clearly define all outcomes, exposures, predictors, potential confounders, and effect modifiers. Give diagnostic criteria, if applicable                                                   | 7           |
| Data sources/ measurement | 8*      | For each variable of interest, give sources of data and details of methods of assessment (measurement). Describe comparability of assessment methods if there is more than one group       | 8           |
| Bias                      | 9       | Describe any efforts to address potential sources of bias                                                                                                                                  | 9-10        |
| Study size                | 10      | Explain how the study size was arrived at                                                                                                                                                  | 8           |



|    |                        |    |                                                                          |             |
|----|------------------------|----|--------------------------------------------------------------------------|-------------|
| 1  | Quantitative variables | 11 | Explain how quantitative variables were handled in the analyses.         | <b>8-10</b> |
| 2  |                        |    | If applicable, describe which groupings were chosen and why              |             |
| 3  |                        |    |                                                                          |             |
| 4  |                        |    |                                                                          |             |
| 5  | Statistical methods    | 12 | (a) Describe all statistical methods, including those used to            |             |
| 6  |                        |    | control for confounding                                                  |             |
| 7  |                        |    |                                                                          |             |
| 8  |                        |    | (b) Describe any methods used to examine subgroups and                   |             |
| 9  |                        |    | interactions                                                             |             |
| 10 |                        |    |                                                                          |             |
| 11 |                        |    | (c) Explain how missing data were addressed                              |             |
| 12 |                        |    |                                                                          |             |
| 13 |                        |    | (d) <i>Cohort study</i> —If applicable, explain how loss to follow-up    | <b>10</b>   |
| 14 |                        |    | was addressed                                                            |             |
| 15 |                        |    |                                                                          |             |
| 16 |                        |    | <i>Case-control study</i> —If applicable, explain how matching of cases  |             |
| 17 |                        |    | and controls was addressed                                               |             |
| 18 |                        |    |                                                                          |             |
| 19 |                        |    | <i>Cross-sectional study</i> —If applicable, describe analytical methods |             |
| 20 |                        |    | taking account of sampling strategy                                      |             |
| 21 |                        |    |                                                                          |             |
| 22 |                        |    | (e) Describe any sensitivity analyses                                    |             |
| 23 |                        |    |                                                                          |             |
| 24 |                        |    |                                                                          |             |
| 25 |                        |    |                                                                          |             |
| 26 |                        |    |                                                                          |             |
| 27 |                        |    |                                                                          |             |
| 28 |                        |    |                                                                          |             |
| 29 |                        |    |                                                                          |             |
| 30 |                        |    |                                                                          |             |
| 31 |                        |    |                                                                          |             |
| 32 |                        |    |                                                                          |             |
| 33 |                        |    |                                                                          |             |
| 34 |                        |    |                                                                          |             |
| 35 | Continued on next page |    |                                                                          |             |
| 36 |                        |    |                                                                          |             |
| 37 |                        |    |                                                                          |             |
| 38 |                        |    |                                                                          |             |
| 39 |                        |    |                                                                          |             |
| 40 |                        |    |                                                                          |             |
| 41 |                        |    |                                                                          |             |
| 42 |                        |    |                                                                          |             |
| 43 |                        |    |                                                                          |             |
| 44 |                        |    |                                                                          |             |
| 45 |                        |    |                                                                          |             |
| 46 |                        |    |                                                                          |             |
| 47 |                        |    |                                                                          |             |
| 48 |                        |    |                                                                          |             |
| 49 |                        |    |                                                                          |             |
| 50 |                        |    |                                                                          |             |
| 51 |                        |    |                                                                          |             |
| 52 |                        |    |                                                                          |             |
| 53 |                        |    |                                                                          |             |
| 54 |                        |    |                                                                          |             |
| 55 |                        |    |                                                                          |             |
| 56 |                        |    |                                                                          |             |
| 57 |                        |    |                                                                          |             |
| 58 |                        |    |                                                                          |             |
| 59 |                        |    |                                                                          |             |
| 60 |                        |    |                                                                          |             |

Continued on next page

| <b>Results</b>           |     |                                                                                                                                                                                                              | <b>Page Number</b>                                         |
|--------------------------|-----|--------------------------------------------------------------------------------------------------------------------------------------------------------------------------------------------------------------|------------------------------------------------------------|
| Participants             | 13* | (a) Report numbers of individuals at each stage of study—eg numbers potentially eligible, examined for eligibility, confirmed eligible, included in the study, completing follow-up, and analysed            | <b>9,10</b>                                                |
|                          |     | (b) Give reasons for non-participation at each stage                                                                                                                                                         |                                                            |
|                          |     | (c) Consider use of a flow diagram                                                                                                                                                                           |                                                            |
| Descriptive data         | 14* | (a) Give characteristics of study participants (eg demographic, clinical, social) and information on exposures and potential confounders                                                                     | <b>09-11</b><br><b>Table 1</b>                             |
|                          |     | (b) Indicate number of participants with missing data for each variable of interest                                                                                                                          |                                                            |
|                          |     | (c) <i>Cohort study</i> —Summarise follow-up time (eg, average and total amount)                                                                                                                             |                                                            |
| Outcome data             | 15* | <i>Cohort study</i> —Report numbers of outcome events or summary measures over time                                                                                                                          | <b>10-11, 14-15</b><br><b>Table 2</b>                      |
|                          |     | <i>Case-control study</i> —Report numbers in each exposure category, or summary measures of exposure                                                                                                         |                                                            |
|                          |     | <i>Cross-sectional study</i> —Report numbers of outcome events or summary measures                                                                                                                           |                                                            |
| Main results             | 16  | (a) Give unadjusted estimates and, if applicable, confounder-adjusted estimates and their precision (eg, 95% confidence interval). Make clear which confounders were adjusted for and why they were included | <b>11-17</b><br><b>Table 2, 3 and 4</b><br><b>Figure 2</b> |
|                          |     | (b) Report category boundaries when continuous variables were categorized                                                                                                                                    |                                                            |
|                          |     | (c) If relevant, consider translating estimates of relative risk into absolute risk for a meaningful time period                                                                                             |                                                            |
| Other analyses           | 17  | Report other analyses done—eg analyses of subgroups and interactions, and sensitivity analyses                                                                                                               |                                                            |
| <b>Discussion</b>        |     |                                                                                                                                                                                                              |                                                            |
| Key results              | 18  | Summarise key results with reference to study objectives                                                                                                                                                     | <b>18</b>                                                  |
| Limitations              | 19  | Discuss limitations of the study, taking into account sources of potential bias or imprecision. Discuss both direction and magnitude of any potential bias                                                   | <b>23</b>                                                  |
| Interpretation           | 20  | Give a cautious overall interpretation of results considering objectives, limitations, multiplicity of analyses, results from similar studies, and other relevant evidence                                   | <b>18-22</b>                                               |
| Generalisability         | 21  | Discuss the generalisability (external validity) of the study results                                                                                                                                        | <b>24</b>                                                  |
| <b>Other information</b> |     |                                                                                                                                                                                                              |                                                            |
| Funding                  | 22  | Give the source of funding and the role of the funders for the present study and, if applicable, for the original study on which the present article is based                                                | <b>25</b>                                                  |

\*Give information separately for cases and controls in case-control studies and, if applicable, for exposed and unexposed groups in cohort and cross-sectional studies.

# BMJ Open

## Antibiotic prescriptions to the inpatients having non-bacterial diagnosis at medicine departments of two private sector hospitals in Madhya Pradesh, India: a cross sectional study

|                                 |                                                                                                                                                                                                                                                                                                                                                                                                                                                                                                                                                                                                                                                                                                                                                                                                                                        |
|---------------------------------|----------------------------------------------------------------------------------------------------------------------------------------------------------------------------------------------------------------------------------------------------------------------------------------------------------------------------------------------------------------------------------------------------------------------------------------------------------------------------------------------------------------------------------------------------------------------------------------------------------------------------------------------------------------------------------------------------------------------------------------------------------------------------------------------------------------------------------------|
| Journal:                        | <i>BMJ Open</i>                                                                                                                                                                                                                                                                                                                                                                                                                                                                                                                                                                                                                                                                                                                                                                                                                        |
| Manuscript ID                   | bmjopen-2016-012974.R2                                                                                                                                                                                                                                                                                                                                                                                                                                                                                                                                                                                                                                                                                                                                                                                                                 |
| Article Type:                   | Research                                                                                                                                                                                                                                                                                                                                                                                                                                                                                                                                                                                                                                                                                                                                                                                                                               |
| Date Submitted by the Author:   | 18-Nov-2016                                                                                                                                                                                                                                                                                                                                                                                                                                                                                                                                                                                                                                                                                                                                                                                                                            |
| Complete List of Authors:       | Landstedt , Kristoffer; Karolinska Institutet, Global Health - Health Systems and Policy (HSP): Medicines, focusing antibiotics, Department of Public Health Sciences<br>Sharma, Ashish; R. D. Gardi Medical College, Department of Medicine<br>Johansson, Fredrik; Karolinska Institutet, Stockholm, Sweden, Global Health - Health Systems and Policy (HSP): Medicines, focusing antibiotics, Department of Public Health Sciences<br>Lundborg, Cecilia; Karolinska Institutet, Stockholm, Sweden, Global Health - Health Systems and Policy (HSP): Medicines, focusing antibiotics, Department of Public Health Sciences<br>Sharma, Megha; R. D. Gardi Medical College, Pharmacology; Karolinska Institutet, Global Health - Health Systems and Policy (HSP): Medicines, focusing antibiotics, Department of Public Health Sciences |
| <b>Primary Subject Heading</b>: | Public health                                                                                                                                                                                                                                                                                                                                                                                                                                                                                                                                                                                                                                                                                                                                                                                                                          |
| Secondary Subject Heading:      | Epidemiology, Global health, Infectious diseases, Public health, Health services research                                                                                                                                                                                                                                                                                                                                                                                                                                                                                                                                                                                                                                                                                                                                              |
| Keywords:                       | Private sector hospitals, Medicine department, Antibiotics, Non-bacterial infections, Inpatients, India                                                                                                                                                                                                                                                                                                                                                                                                                                                                                                                                                                                                                                                                                                                                |
|                                 |                                                                                                                                                                                                                                                                                                                                                                                                                                                                                                                                                                                                                                                                                                                                                                                                                                        |

SCHOLARONE™  
Manuscripts

1  
2  
3 **Antibiotic prescriptions to the inpatients having non-bacterial diagnosis at medicine**  
4 **departments of two private sector hospitals in Madhya Pradesh, India: a cross sectional**  
5 **study**  
6

7 **Authors list:**

8 Kristoffer Landstedt<sup>1</sup>, Ashish Sharma<sup>2</sup>, Fredrik Johansson<sup>1</sup>, Cecilia StålsbyLundborg<sup>1\*</sup>, Megha  
9 Sharma<sup>1, 3\*§</sup>  
10

11 <sup>1</sup>Global Health - Health Systems and Policy (HSP): Medicines, focusing antibiotics,  
12 Department of Public Health Sciences, Karolinska Institutet, Tomtebodavägen 18A, 17177  
13 Stockholm, Sweden  
14

15 <sup>2</sup>Department of Medicine, Ruxmaniben Deepchand Gardi Medical College, Ujjain, India  
16

17 <sup>3</sup>Department of Pharmacology, Ruxmaniben Deepchand Gardi Medical College, Ujjain, India  
18  
19

20  
21  
22 \* Shared last authorship

23 §Corresponding author: Megha Sharma

24 Department of Pharmacology, Ruxmaniben Deepchand Gardi Medical College, Ujjain, India,  
25 Mobile: +91-98273-61961, Office- +91-7368-261288  
26  
27

28  
29 Global Health - Health Systems and Policy (HSP): Medicines, focusing antibiotics,  
30 Department of Public Health Sciences, Karolinska Institutet, Tomtebodavägen 18A, 17177  
31 Stockholm, Sweden  
32  
33

34  
35  
36  
37  
38 **Keywords:** Private sector hospitals, Medicine department, Antibiotics, Non-bacterial  
39 infections, Inpatients, India  
40  
41  
42  
43  
44

45 **Email addresses:**

46 KL: Landstedt\_N@hotmail.com

47 AS: ashishricha2001@yahoo.co.in

48 FJ: fredrik.johansson@stud.ki.se

49 CSL: cecilia.stalsby.lundborg@ki.se

50 MS: meghasharma27@rediffmail.com  
51  
52  
53  
54  
55  
56  
57  
58  
59  
60

**Abstract**

**Objectives:** To present and compare antibiotic prescribing among inpatients among most common non-bacterial diagnoses groups at medicine departments of a teaching (TH) and a non-teaching hospital (NTH) in Central India.

**Setting:** An observational cross-sectional study was conducted at two tertiary care settings at Ujjain district, Madhya Pradesh, India.

**Participants:** The data was collected manually, using a customized form. Complete records of all inpatients, who were >15 years of age and stayed at-least for one night in either of the hospitals during 2008-2011, were analysed.

**Outcome measures:** Inpatients were grouped based on the presence or absence of; a bacterial infectious diagnosis, viral/ malaria fever or cardiovascular diseases. Classes of antibiotics prescribed to these groups, and adherence to the available prescribing guidelines were compared between the hospitals using the notes from the patient files, and the diagnoses.

**Results:** Of 20303 inpatients included in the study, 66% were prescribed antibiotics. Trade name prescribing and use of broad spectrum antibiotics were more frequent at the NTH compared to the TH ( $p<0.001$ ). At the TH significantly higher proportion of patients having fever without registered bacterial infection; were prescribed antibiotics (82%) compared with the NTH (71%,  $p<0.001$ ). Patients admitted for cardiovascular diagnosis without registered bacterial infections received antibiotic prescriptions at both hospitals; (NTH- 47%and TH- 37%); it was significantly higher at the NTH ( $p<0.001$ ). None of the diagnoses were confirmed by microbiology reports.

**Conclusions:** Prescribing antibiotic including broad spectrum antibiotics to the inpatients without bacterial infections i.e. viral fever, malaria and cardiovascular diseases were common

1  
2  
3 at both hospitals which increase the risk for development of bacterial resistance, a global  
4 public health threat. Taking account of over prescribing of antibiotics, development and  
5 implementation of local prescribing guidelines, encouragement to use laboratory facilities,  
6 and prescription analysis, with antibiotic stewardship programs are the main  
7 recommendations for the settings.  
8  
9  
10  
11  
12  
13  
14  
15  
16  
17  
18  
19  
20  
21  
22  
23  
24  
25  
26  
27  
28  
29  
30  
31  
32  
33  
34  
35  
36  
37  
38  
39  
40  
41  
42  
43  
44  
45  
46  
47  
48  
49  
50  
51  
52  
53  
54  
55  
56  
57  
58  
59  
60

For peer review only

### Strengths and limitations

- Prospective study over a long time period of three years and inclusion of all patients, irrespective of their age and sex strengthens the representativeness of the results and overcome the seasonal variations.
- Data collecting tools were same at both study hospitals and the staff who collected the data was trained by the same person at both locations to minimize the variances.
- An observational non-interventional study design might have minimized the effect on the prescribers of being observed and audited.
- All possible efforts were made to minimize the risk of missing data by continuous monitoring and cross checking of the data. However, some data, for example few diagnoses might have been lost during translation from analogue to digital records.
- A big proportion of patients were categorised in the suspected bacterial diagnosis groups. Some of these diagnoses could have been categorised in non-bacterial diagnoses group if confirmed aetiology, i.e. microbiology reports, was present. This could have contributed to even higher antibiotic prescribing rates in the non-bacterial diagnoses group. However, due to absence of confirmed aetiology and observational study design this was indispensable.

## BACKGROUND

Increasing morbidity and mortality due to infectious diseases, despite of the availability of the lifesaving antibiotics is an alarming situation, globally,[1]. These incidences of mortalities due to infections are higher in low- and middle-income countries than in high-income countries,[2–4]. The WHO has reported a high burden of communicable diseases in India, and infections are responsible for 28% of the total mortality in the country,[5,6]. Additionally, antibiotic resistance in India is reported to be high. However, figures cannot be generalized to all Indian settings as the bacterial resistance patterns widely vary between its regions and settings and most studies so far have been relatively limited in scope,[7].

Irrational (both over- and under-) use of antibacterials, is of global concern. It results in unnecessary treatment costs, is a potential risk for the development of antibiotic resistance and side effects such as antibiotic associated diarrhoea caused by *Clostridium difficile* or gastroenteritis,[8]. According to a report, the global consumption of antibiotics increased by 36% between 2000 and 2010 of which five countries including India (Brazil, Russia, India, China and South Africa) accounted for 76% of this increase,[9]. Despite of the paucity of studies that describe antibiotic prescribing from India, Van Boeckel et al presented India on the top of the list of antibiotic consumption with  $12.9 \times 10^9$  units in 2010 where one unit indicates a pill, capsule or ampoule,[1,9]. However, this increase might also have meant that segments of the population that previously had no access to antibiotics can now access antibiotics yet it cannot be disregarded that antibiotic resistance is a sequel of antibiotic use,[10].

It is thus imperative to map the prescribing patterns of antibiotics on a local level to address the potential need of improvement and to counter the consequences of inappropriate prescription of antibiotics. Indian private sector are the major healthcare providers but little is known about prescribing patterns in this sector,[11–14].



## OBJECTIVES

The study was conducted to present, analyse and compare antibiotic prescribing to the inpatients enrolled for most common non-bacterial diagnoses at the medicine departments of a teaching (TH) and a non-teaching hospital (NTH) in Central India.

## METHODS

### Study design

A cross sectional observational design was selected to conduct the study.

### Setting

The study was conducted at the medicine departments of two tertiary care hospitals from private sector in Ujjain district, India. The hospitals are addressed as teaching hospital (TH) and non-teaching hospital (NTH). Both hospitals are run by the same trust. The TH is located in a rural area of Ujjain district and had 570 beds at the time of the study. The NTH is located in the central part of Ujjain city and had 350 beds at the time of the study. The TH provides medical services including medical treatment and free of charge medicines to all patients while the NTH charges for the medical facilities on a 'no profit-no loss' basis. Patients from the NTH have to buy prescribed medicines out-of-pocket from the pharmacies inside or outside the hospital. The physicians at the TH are salary paid and do not have any direct exposure to the sales representatives of pharmaceutical companies. Furthermore, the management at the TH is responsible for the purchase and supply of the drugs.

Hospital level Essential medicine list was available in written form at the TH but no specific implementation activities were conducted during the study period. Local prescribing guidelines were not present in any of the hospitals. Almost all physicians practicing at the NTH also had private practice and could be contacted by the representatives of pharmaceutical companies easily. The payments of the physicians at the NTH increase above

1  
2  
3 par according to the number of patients they admit in the hospital and the number of visits  
4  
5 made to the inpatients. Both hospitals are tertiary care hospitals with a number of specialty  
6  
7 departments such as; Pediatrics, Obstetrics and Gynecology, Surgery, Orthopedics,  
8  
9 Pulmonary Medicine, and so on to treat specific patients. For example; patients presenting  
10  
11 with complaints related to lungs and chest (other than heart) visit the Pulmonary Medicine  
12  
13 department. A well-equipped microbiology laboratory was present to process the samples free  
14  
15 of cost for all from the TH and with nominal charges from the NTH.  
16  
17

## 18 19 **Participants**

### 20 21 **Inclusion and exclusion criteria**

22  
23 Patients who stayed for at least one night at medicine departments of either of the two  
24  
25 hospitals were considered as inpatients and included in the study. Patients who had  
26  
27 incomplete records or admitted to the medical intensive care units within the medicine  
28  
29 departments were not included in the analysis. Treatment recommendations including dose  
30  
31 and frequency is different for patients under 15 years of age and the DDD measurement is not  
32  
33 applicable to them, thus they were also excluded,[15].  
34  
35  
36

### 37 38 **Variables**

39  
40 The patient information was analysed for age, sex, diagnosis, duration of hospitals stay, if  
41  
42 they received antibiotic treatment, and duration of antibiotic treatment. The prescriptions were  
43  
44 analysed for the type of antibiotics prescribed, its dose, and frequency. The antibiotics were  
45  
46 classified according to the Anatomical Therapeutic Chemical (ATC) classification given by  
47  
48 the WHO Collaborating Centre for Drug Statistics Methodology (WHOCC),[16].Defined  
49  
50 Daily Doses (DDD) were calculated for all prescribed antibiotics,[16]. DDD is a technical  
51  
52 unit for comparative purposes and is the average daily dose of the specific drug for its main  
53  
54 indication in adults,[15]. Fixed dose combinations of antibiotics (FDCs) that did not have an  
55  
56 ATC code assigned by WHOCC were assigned the code 'J01RA\*' according to Sharma et  
57  
58  
59  
60

1  
2  
3 al,[17]. FDCs that did not have a DDD were assigned one by examining the constituents and  
4  
5 the proportions in which they were found in one unit dose. DDD was then calculated on the  
6  
7 basis of number of units and converted to dose in gram. Total number of antibiotics  
8  
9 prescribed during hospital stay was counted per patient and was termed as prescribing  
10  
11 occasions.

12  
13  
14 The List of Essential Medicines of India (NLEMI) is based on the WHO list of essential  
15  
16 medicines (WHOLEM) and adapted to the disease panorama of India,[18]. These lists serve  
17  
18 as guidelines to promote the prescribing of safe, cheap and effective drugs to the  
19  
20 population,[18,19]. Adherence to these lists was evaluated for all prescriptions.  
21  
22

### 23 24 **Data sources and considerations**

25  
26  
27 The data collection process is described in detail elsewhere,[13,14]. In brief, the study was  
28  
29 conducted prospectively between April 1<sup>st</sup>, 2008 and March 31<sup>st</sup>, 2011. Patient throughput in  
30  
31 the TH and the NTH amounted to 29026 and 41561 patients respectively. The data were  
32  
33 manually collected by the nurses using a specially designed form attached to the patient's file  
34  
35 at the medicine department of the TH and the NTH. All patients were included to minimize  
36  
37 the possibility of selection bias. Every admission in the department was considered as a new  
38  
39 patient. The nurses and new recruits were trained regularly for the data collection by the last  
40  
41 author (MS). The data collection form was updated daily based on patient's day to day  
42  
43 progress. All notes written in the patient files by the treating consultant were recorded and  
44  
45 included for the analysis. It was possible that a patient could have more than one diagnosis.  
46  
47 Therefore all indications, diagnoses and/or symptoms recorded in the patient files, were  
48  
49 transferred to the data collection form. The data was translated to digital data files using EPI  
50  
51 Info 3.1 and Microsoft Excel. Two specifically trained data entry operators translated the  
52  
53 diagnoses as per 'International Classification of Diseases' (ICD-10 codes) and the generic  
54  
55  
56  
57  
58  
59  
60

1  
2  
3 names of the prescribed antibiotics were translated to WHO assigned ATC-codes and Defined  
4  
5 Daily Doses (DDDs) per day,[15,20,21].  
6  
7

8 In order to exclude all clinically suspected cases of bacterial infection and following the aim  
9  
10 of the study, best possible efforts were made to distinguish the patients who had any  
11  
12 indications even for secondary antibiotic prophylaxis from those who did not,[22–24]. The  
13  
14 patients were categorized into three main groups using the diagnoses registered in the patient  
15  
16 files and the ICD-10 codes; Group (a) cardiovascular diseases, (b) non-bacterial fevers and (c)  
17  
18 all diagnoses other than Group (a) and (b) including all types of bacterial infections. Sixty  
19  
20 seven percent of patients in the TH and 75% in the NTH were included in Group (c). All  
21  
22 cases of chronic obstructive pulmonary disease (COPD) were also included in Group c.  
23  
24 Although aetiology of the disease was seldom specified in the records but these patients  
25  
26 should receive less restricted antibiotic treatment.  
27  
28

29  
30  
31 Groups (a) and (b) were selected for detail study of the antibiotic prescribing for non-bacterial  
32  
33 diagnoses as per the study aim. In 'Group (a)', hypertension, acute myocardial infarction and  
34  
35 valvular heart disease were the most common diagnoses. In 'Group (b)' different types of  
36  
37 malaria and cases of viral fever (ICD code- B34.9) were included. These non-bacterial fevers  
38  
39 were common in both study settings. It has previously been reported that antibiotics are  
40  
41 prescribed to a high extent to patients having malaria or viral fever in malaria endemic  
42  
43 countries like Uganda (Figure 1),[25]. Moreover, Groups (a) and (b) comprised the largest  
44  
45 homogenous patient groups in our study settings.  
46  
47  
48

49 **Figure 1. The process of selection and grouping of inpatients admitted in medicine departments**  
50 **of the TH and the NTH based on their diagnosis.**  
51

52 These groups were further divided into four sub-groups to identify and analyse the patients  
53  
54 exclusively having non-bacterial diagnoses corresponding to our study aim. The  
55  
56 cardiovascular group (Group a) was divided in two sub-groups; 'cardiovascular diseases with  
57  
58  
59  
60

1  
2  
3 no registered bacterial infection' (sub-group 1), 'cardiovascular diseases with suspected  
4 bacterial infection' (sub-group 2). Similarly, the non-bacterial fever group (Group b) was  
5 divided 'malaria or viral fever with no registered bacterial infection' (sub-group 3) and  
6  
7 'malaria or viral fever with suspected bacterial infection' (sub-group 4, Figure 1).  
8  
9

10  
11  
12 All patients with rheumatic heart disease (RHD) were categorized in sub-group 2 or in sub-  
13 group 4 to rule out all possible bacterial infection as a confounder, since the WHO guidelines  
14 for secondary prevention after rheumatic fever sets the duration of preventive antibiotic  
15 treatment from five years up to life-long, depending on a number of factors e.g. time since the  
16 last episode of rheumatic fever and severity of valve engagement and supports an individual  
17 assessment of every case,[22,23].  
18  
19  
20  
21  
22  
23  
24

25  
26 An antibiotic prescribed for a day was considered as one prescribing occasion. Prescribed  
27 DDDs were calculated per 1000 patients. According to WHOCC, oral metronidazole  
28 (P01AB01) is coded as an antiprotozoal drug, but is coded as an antibacterial in the NLEMI.  
29  
30  
31 Therefore it was considered as an antibacterial in this study,[18].  
32  
33  
34  
35

### 36 **Ethics statement**

37  
38  
39 Being an observational study, the data collection did not interfere with the treatment or caused  
40 any extra risks for the patients. Moreover, the names of the prescribers were not recorded to  
41 minimize the effect of being observed. All patients were assigned a unique code during the  
42 data entry to maintain anonymity of the inpatients. This unique code was used to compare  
43 details of patient information and antibiotic prescriptions for the analysis. The data was  
44 collected at individual level for all inpatients and was linked per patient with the assigned  
45 unique codes instead of; for example social security number. However, the analysis was  
46 conducted at group level to maintain the confidentiality.  
47  
48  
49  
50  
51  
52  
53  
54  
55  
56  
57  
58  
59  
60

1  
2  
3 The ethics committee of Ruxmaniben Deepchand Gardi Medical College, Ujjain, approved  
4  
5 the study with approval number: 41/2007.  
6  
7

### 8 **Statistical Methods**

9  
10 All frequency and percentage of categorical values were calculated. Sum, median, mean,  
11  
12 range and standard deviation were calculated for continuous numerical values. Values were  
13  
14 rounded off to the closest whole number for percentage, prescription tables and in the text.  
15  
16 The independent t-test was used for comparison of normally distributed and continuous  
17  
18 variables. The chi-square test was used for comparison of categorical values. Fischer's exact  
19  
20 test was used for expected values below 5 and Pearson chi-square test was used for expected  
21  
22 values above 5. Bonferroni's correction for multiple comparisons was used and p- values  
23  
24 <0.001 were chosen for significance level to minimize the risks of type one errors. The data  
25  
26 were analysed with Excel, SPSS version 22 (SPSS Inc., Chicago, IL, USA) and STATA  
27  
28 version 13.1 (Stata Corp, College station, TX, USA).  
29  
30  
31  
32

### 33 **RESULTS**

34  
35  
36 During the study period, totally 21557 patients were admitted to the two medicine  
37  
38 departments, 7176 patients in the TH and 14381 in the NTH (Figure 1). Of the admitted  
39  
40 patients, records of 20 patients were incomplete, 949 (5%) stayed less than one night and 285  
41  
42 patients (1%) were aged <15 years. Therefore, as per the inclusion criteria 1254 patient  
43  
44 records were excluded and 20303 (94%) records were included for further analysis (6961 at  
45  
46 the TH and 13342 at the NTH, Figure 1).  
47  
48

49  
50 Most common diagnoses in the TH were chronic obstructive pulmonary disease (COPD,  
51  
52 10%), viral fever (7%) and hypertension (5%) while in the NTH were viral fever (10%),  
53  
54 malaria (6%) and COPD (5%, Table 1). Antibiotics were prescribed to 4540/6961 inpatients  
55  
56 (65%) in the TH and 8900/13342 (67%) in the NTH (Table 2). An average of eight and five  
57  
58  
59  
60

1  
2  
3 prescribing occasions was found per patient at the TH and the NTH respectively. Overall a  
4  
5 significantly higher proportion of the antibiotics prescribed in the TH adhered to the NLEMI;  
6  
7 77% prescriptions (27649/35732) than in the NTH; 60% (24683/41068,  $p<0.001$ ).

8  
9  
10 Seven percent of antibiotics in the TH were prescribed using generic names it was  
11  
12 significantly higher compared to the NTH (2%,  $p<0.001$ ). Some antibiotics were prescribed  
13  
14 using trade names at the TH e.g., "Cipro", "Doxy", "Genta" and "Metrogyl". However, these  
15  
16 were local abbreviations devised by the staff for ciprofloxacin, doxycycline, gentamycin and  
17  
18 metronidazole respectively. Even though these four antibiotics were prescribed using trade  
19  
20 names, generic antibiotics were dispensed from the hospital pharmacy. A longer duration of  
21  
22 stay and longer duration of antibiotic treatment was observed at the TH (mean days; 6 and 6  
23  
24 respectively) compared to the NTH (mean days; 3 and 4 respectively,  $p<0.001$ ).

### 25 26 27 28 **Distribution of inpatients in Groups a and b, and antibiotic prescription patterns**

29  
30  
31 Cardiovascular diseases accounted for 48% of patients in Group (a) and (b) at the TH and  
32  
33 30% at the NTH. In the non-bacterial fever group, malaria was significantly more common at  
34  
35 the NTH (74%) and viral fever was significantly more common at the TH (66%,  $p<0.001$ ,  
36  
37 Table 1).

38  
39  
40 Broad-spectrum antibiotics such as third-generation cephalosporins (J01DD) and FDCs  
41  
42 (J01RA\*) comprised 52% of the prescribing occasions at the NTH of which FDCs accounted  
43  
44 for approximately half (Table 3). These classes accounted for 13% of total prescribing  
45  
46 occasions and <1% FDCs. At the NTH, cephalosporins (third-generation cephalosporins  
47  
48 J01DD, >30%) were most commonly prescribed for the cardiovascular diseases (>35%),  
49  
50 followed by FDCs (>20%). Fluoroquinolones (J01M) was the most commonly prescribed  
51  
52 antibiotic class in the TH in both (a) and (b) groups (>30% and >40% respectively).  
53  
54  
55  
56  
57  
58  
59  
60

1  
2  
3  
4  
5  
6  
7  
8  
9  
10  
11  
12  
13  
14  
15  
16  
17  
18  
19  
20  
21  
22  
23  
24  
25  
26  
27  
28  
29  
30  
31  
32  
33  
34  
35  
36  
37  
38  
39  
40  
41  
42  
43  
44  
45  
46  
47  
48  
49

**Table 1: Diagnoses of the four groups of inpatients at medicine departments at one teaching and one non-teaching hospitals in Ujjain, India**

| Group (a): Cardiovascular diseases                                   |             |             |                                                                  |            |            | Group (b): Malaria or Viral fever                                            |            |             |                                                                          |           |           |
|----------------------------------------------------------------------|-------------|-------------|------------------------------------------------------------------|------------|------------|------------------------------------------------------------------------------|------------|-------------|--------------------------------------------------------------------------|-----------|-----------|
| Cardiovascular with no registered bacterial infection<br>Sub-group 1 |             |             | Cardiovascular with suspected bacterial infection<br>Sub-group 2 |            |            | Malaria or Viral Fever with no registered bacterial infection<br>Sub-group 3 |            |             | Malaria or Viral Fever with suspected bacterial infection<br>Sub-group 4 |           |           |
| Diagnosis group                                                      | TH          | NTH         | Diagnosis group                                                  | TH         | NTH        | Diagnosis group                                                              | TH         | NTH         | Diagnosis group                                                          | TH        | NTH       |
|                                                                      | n(%)        | n(%)        |                                                                  | n(%)       | n(%)       |                                                                              | n(%)       | n(%)        |                                                                          | n(%)      | n(%)      |
| <b>Total</b>                                                         | <b>1068</b> | <b>1738</b> | <b>Total</b>                                                     | <b>438</b> | <b>254</b> | <b>Total</b>                                                                 | <b>693</b> | <b>1177</b> | <b>Total</b>                                                             | <b>55</b> | <b>28</b> |
| Hypertension                                                         | 328(31)     | 470(27)     | COPD                                                             | 209(48)    | 77(30)     | Malaria                                                                      | 237(34)    | 872(74)     | COPD                                                                     | 10(18)    | 5(18)     |
| Cerebro vascular accident                                            | 126(12)     | 383(22)     | Rheumatic Heart Disease                                          | 130(30)    | 102(40)    | Cerebral malaria caused by <i>P. falciparum</i>                              | 4(1)       | 11(1)       | Urinarytract infection                                                   | 5(9)      | 7(25)     |
| Acute Myocardial Infarction                                          | 28(3)       | 202(12)     | Pulmonary Tuberculosis                                           | 19(4)      | 18(7)      | Malaria caused by <i>P. falciparum</i> UNS                                   | 9(1)       | 9(1)        | Tyfooid fever                                                            | 8(15)     | 2(7)      |
| Chronic Ischemic Heart Disease                                       | 17(2)       | 189(11)     | Urinarytract infection                                           | 17(4)      | 15(6)      | Malaria caused by <i>P. vivax</i> UNS                                        | 16(2)      | 61(5)       | Acute gastroenteritis                                                    | 4(7)      | 6(21)     |
| Coronary Artery Disease                                              | 98(9)       | 101(6)      | Acute Gastroenteritis                                            | 14(3)      | 12(5)      | Malaria UNS                                                                  | 208(30)    | 791(67)     | Disease of airways UNS                                                   | 8(15)     | 0(0)      |
| Left Ventricle Failure                                               | 44(4)       | 69(4)       | Lower airway infection UNS                                       | 13(3)      | 0(0)       | <b>Viral fever</b>                                                           | 456(66)    | 305(26)     | Disease of upper airways UNS                                             | 7(13)     | 0(0)      |
| Congestive Heart Failure                                             | 56(5)       | 39(2)       | Sepsis                                                           | 0(0)       | 5(2)       |                                                                              |            |             | Pulmonary Tuberculosis                                                   | 4(7)      | 2(7)      |
| Dilated Cardiomyopathy                                               | 79(7)       | 6(<1)       | HIV with infection                                               | 8(2)       | 1(<1)      |                                                                              |            |             | HIV with infection                                                       | 2(4)      | 0(0)      |
| Unspecified Cardiomyopathy                                           | 21(2)       | 54(3)       | Rheumatic Fever                                                  | 1(<1)      | 4(2)       |                                                                              |            |             | Rheumatic Heart Disease                                                  | 2(4)      | 1(4)      |
| Multiple Valve Disease                                               | 61(6)       | 7(<1)       | Endocarditis                                                     | 0(0)       | 4(2)       |                                                                              |            |             | Pelvic Inflammatory Disease                                              | 2(4)      | 0(0)      |
| Angina Pectoris                                                      | 10(1)       | 35(2)       | Pneumonia                                                        | 1(<1)      | 4(2)       |                                                                              |            |             | Pneumonia                                                                | 0(0)      | 1(4)      |
| Acute Ischemic Heart Disease                                         | 31(3)       | 11(1)       | Others                                                           | 26(6)      | 12(5)      |                                                                              |            |             | Other diagnoses                                                          | 3(5)      | 4(14)     |
| Deep Vein Thrombosis UNS                                             | 13(1)       | 19(1)       |                                                                  |            |            |                                                                              |            |             |                                                                          |           |           |
| Mitral Stenosis                                                      | 21(2)       | 2(<1)       |                                                                  |            |            |                                                                              |            |             |                                                                          |           |           |
| Hypertensive Heart Disease                                           | 20(2)       | 1(<1)       |                                                                  |            |            |                                                                              |            |             |                                                                          |           |           |
| Cardiac arrest                                                       | 2(<1)       | 16(1)       |                                                                  |            |            |                                                                              |            |             |                                                                          |           |           |
| Other                                                                | 113(11)     | 134(8)      |                                                                  |            |            |                                                                              |            |             |                                                                          |           |           |

Abbreviations: n (%): Number of patients (percentage in that diagnosis group), NTH: non-teaching hospital, TH: teaching hospital, COPD: chronic obstructive pulmonary disease, UNS: unspecified, *P.-plasmodium*, HIV: human immunodeficiency virus.



**Table 2: Demographic details and antibiotic prescribing information of the inpatients at medicine departments at one teaching and one non-teaching hospitals in Ujjain, India**

|                                           | Group (a): Cardiovascular diseases |            |                  |                                                                     |          |                  | Group (b): Malaria or Viral Fever                               |          |                  |                                                                             |          |                  |                                                                         |         |                    |
|-------------------------------------------|------------------------------------|------------|------------------|---------------------------------------------------------------------|----------|------------------|-----------------------------------------------------------------|----------|------------------|-----------------------------------------------------------------------------|----------|------------------|-------------------------------------------------------------------------|---------|--------------------|
|                                           | Medicine Department                |            |                  | Cardiovascular with no registered bacterial diagnosis (Sub-group 1) |          |                  | Cardiovascular with suspected bacterial infection (Sub-group 2) |          |                  | Malaria or Viral Fever with no registered bacterial diagnosis (Sub-group 3) |          |                  | Malaria or Viral Fever with suspected bacterial infection (Sub-group 4) |         |                    |
|                                           | TH                                 | NTH        | p-value          | TH                                                                  | NTH      | p-value          | TH                                                              | NTH      | p-value          | TH                                                                          | NTH      | p-value          | TH                                                                      | NTH     | p-value            |
| Inpatients; n                             | 6961                               | 13342      |                  | 1068                                                                | 1738     |                  | 438                                                             | 254      |                  | 693                                                                         | 1177     |                  | 55                                                                      | 28      |                    |
| Age; mean years (SD)                      | 45(17)                             | 43 (18)    | <b>&lt;0.001</b> | 53 (14)                                                             | 55 (15)  | <b>&lt;0.001</b> | 49 (17)                                                         | 51 (17)  | 0.222            | 36 (15)                                                                     | 35 (16)  | 0.387            | 37 (14)                                                                 | 40 (20) | 0.440              |
| Inpatients prescribed AB; n (%)           | 4540 (65)                          | 8900 (67)  | 0.034            | 392 (37)                                                            | 808 (47) | <b>&lt;0.001</b> | 299 (68)                                                        | 179 (71) | 0.545            | 569 (82)                                                                    | 831 (71) | <b>&lt;0.001</b> | 53 (96)                                                                 | 21 (75) | 0.006 <sup>a</sup> |
| Duration of hospital stay; mean days (SD) | 6 (5)                              | 3 (3)      | <b>&lt;0.001</b> | 6 (5)                                                               | 3 (3)    | <b>&lt;0.001</b> | 7 (5)                                                           | 4 (3)    | <b>&lt;0.001</b> | 4 (4)                                                                       | 3 (2)    | <b>&lt;0.001</b> | 5 (3)                                                                   | 4(2)    | 0.796              |
| Duration of AB treatment; mean days (SD)  | 6 (4)                              | 4 (2)      | <b>&lt;0.001</b> | 6 (4)                                                               | 4 (2)    | <b>&lt;0.001</b> | 7 (4)                                                           | 4 (2)    | <b>&lt;0.001</b> | 5 (3)                                                                       | 4 (2)    | <b>&lt;0.001</b> | 5 (2)                                                                   | 5(2)    | 0.419              |
| Total AB prescription; n                  | 35732                              | 41068      |                  | 2741                                                                | 3366     |                  | 2388                                                            | 855      |                  | 3210                                                                        | 3451     |                  | 316                                                                     | 128     |                    |
| Prescriptions per patient                 | 7.8                                | 4.6        |                  | 7                                                                   | 4        |                  | 8                                                               | 4.8      |                  | 5.6                                                                         | 4.2      |                  | 6                                                                       | 6.1     |                    |
| AB prescriptions by generic name; n (%)   | 2341 (7)                           | 685 (2)    | <b>&lt;0.001</b> | 175 (6)                                                             | 47 (1)   | <b>&lt;0.001</b> | 282 (12)                                                        | 46 (5)   | <b>&lt;0.001</b> | 61 (2)                                                                      | 52 (2)   | 0.214            | 19 (6)                                                                  | 5 (4)   | 0.374 <sup>a</sup> |
| Prescriptions of AB found in NLEMI; n (%) | 27640 (77)                         | 24683 (60) | <b>&lt;0.001</b> | -                                                                   | -        | -                | -                                                               | -        | -                | -                                                                           | -        | -                | -                                                                       | -       | -                  |

Abbreviations: AB: antibiotics, NTH: non-teaching hospital, SD: standard deviation, TH: teaching hospital. Significant p-values are shown in bold. Independent sample t-test was used to compare age, duration of hospital stay and duration of antibiotic treatment. Pearson chi-square was used to compare prescription details with expected value >5. <sup>a</sup>Fischer's exact test was used to compare expected values <5.

**Table 3: Class wise distribution of prescribed antibiotics in four selected diagnoses groups at one teaching and one non-teaching hospitals in Ujjain, India**

| Name of AB; ATC-code                                         | Group (a): Cardiovascular diseases                                  |           |                  |                                                                 |          |                  | Group (b): Malaria or Viral fever                                           |           |                  |                                                                         |         |                    |
|--------------------------------------------------------------|---------------------------------------------------------------------|-----------|------------------|-----------------------------------------------------------------|----------|------------------|-----------------------------------------------------------------------------|-----------|------------------|-------------------------------------------------------------------------|---------|--------------------|
|                                                              | Cardiovascular with no registered bacterial infection (Sub-group 1) |           |                  | Cardiovascular with suspected bacterial infection (Sub-group 2) |          |                  | Malaria or Viral Fever with no registered bacterial infection (Sub-group 3) |           |                  | Malaria or Viral Fever with suspected bacterial infection (Sub-group 4) |         |                    |
|                                                              | TH                                                                  | NTH       | p-value          | TH                                                              | NTH      | p-value          | TH                                                                          | NTH       | p-value          | TH                                                                      | NTH     | p-value            |
|                                                              | n (%)                                                               | n (%)     |                  | n (%)                                                           | n (%)    |                  | n (%)                                                                       | n (%)     |                  | n (%)                                                                   | n (%)   |                    |
| Total prescriptions                                          | 2741                                                                | 3366      |                  | 2388                                                            | 855      |                  | 3210                                                                        | 3451      |                  | 316                                                                     | 128     |                    |
| <b>Tetracyclines; J01A: J01AA</b>                            | 284 (10)                                                            | 5 (0)     | <b>&lt;0.001</b> | 243 (10)                                                        | 0 (0)    |                  | 553 (17)                                                                    | 75 (2)    | <b>&lt;0.001</b> | 83 (26)                                                                 | 0 (0)   |                    |
| <b>Beta-lactam ABs, penicillin; J01C</b>                     | 458 (17)                                                            | 498 (15)  | 0.041            | 622 (26)                                                        | 184 (22) | 0.009            | 111 (3)                                                                     | 245 (7)   | <b>&lt;0.001</b> | 12 (4)                                                                  | 7 (5)   | 0.431              |
| Extended-spectrum penicillins; J01CA                         | 83 (3)                                                              | 99 (3)    | 0.843            | 122 (5)                                                         | 99 (12)  | <b>&lt;0.001</b> | 19 (1)                                                                      | 51 (1)    | <b>&lt;0.001</b> | 0 (0)                                                                   | 2 (2)   |                    |
| Combination of penicillin incl. Beta-lactamase AB; J01CR     | 373 (14)                                                            | 399 (12)  | 0.040            | 500 (21)                                                        | 85 (10)  | <b>&lt;0.001</b> | 92 (3)                                                                      | 194 (6)   | <b>&lt;0.001</b> | 12 (4)                                                                  | 5 (4)   | 1.0 <sup>a</sup>   |
| <b>Other Beta-lactam; J01D</b>                               | 488 (18)                                                            | 1391 (41) | <b>&lt;0.001</b> | 353 (15)                                                        | 304 (36) | <b>&lt;0.001</b> | 665 (21)                                                                    | 1792 (52) | <b>&lt;0.001</b> | 40 (13)                                                                 | 39 (30) | <b>&lt;0.001</b>   |
| 1st gen. cephalosporins; J01DB                               | 7 (0)                                                               | 16 (1)    | 0.163            | 0 (0)                                                           | 5 (1)    |                  | 0 (0)                                                                       | 9 (0)     |                  | 0 (0)                                                                   | 0 (0)   |                    |
| 2nd gen. cephalosporins; J01DC                               | 0 (0)                                                               | 98 (3)    |                  | 0 (0)                                                           | 27 (3)   |                  | 0 (0)                                                                       | 168 (5)   |                  | 0 (0)                                                                   | 0 (0)   |                    |
| 3rd gen. cephalosporins; J01DD                               | 481 (18)                                                            | 1254 (37) | <b>&lt;0.001</b> | 353 (15)                                                        | 272 (32) | <b>&lt;0.001</b> | 665 (21)                                                                    | 1606 (47) | <b>&lt;0.001</b> | 40 (13)                                                                 | 39 (30) | <b>&lt;0.001</b>   |
| 4th gen. cephalosporins; J01DH                               | 8 (0)                                                               | 23 (1)    | 0.032            | 0 (0)                                                           | 0 (0)    |                  | 0 (0)                                                                       | 9 (0)     |                  | 0 (0)                                                                   | 0 (0)   |                    |
| <b>Sulfonamide with timethoprim; J01E: J01EE</b>             | 8 (0)                                                               | 0 (0)     |                  | 18 (1)                                                          | 0 (0)    |                  | 8 (0)                                                                       | 0 (0)     |                  | 0 (0)                                                                   | 0 (0)   |                    |
| <b>Macrolides, lincosamides J01F</b>                         | 16 (1)                                                              | 2 (0)     | <b>&lt;0.001</b> | 4 (0)                                                           | 6 (1)    | 0.025*           | 15 (0)                                                                      | 7 (0)     | 0.060            | 3 (1)                                                                   | 4 (3)   | 0.110 <sup>a</sup> |
| Macrolides; J01FA                                            | 12 (0)                                                              | 2         | 0.002            | 4 (0)                                                           | 6 (1)    |                  | 15 (0)                                                                      | 7 (0)     |                  | 3 (1)                                                                   | 4 (3)   |                    |
| Lincosamides; J01FF                                          | 4 (0)                                                               | 0 (0)     |                  | 0 (0)                                                           | 0 (0)    |                  | 0 (0)                                                                       | 0 (0)     |                  | 0 (0)                                                                   | 0 (0)   |                    |
| <b>Aminoglycoside; J01G: J01GB</b>                           | 78 (3)                                                              | 73 (2)    | 0.090            | 149 (6)                                                         | 46 (5)   | 0.364            | 17 (1)                                                                      | 60 (2)    | <b>&lt;0.001</b> | 11 (3)                                                                  | 9 (7)   | 0.102              |
| <b>Quinolones; J01M: J01MA</b>                               | 1031 (38)                                                           | 301 (9)   | <b>&lt;0.001</b> | 731 (31)                                                        | 112 (13) | <b>&lt;0.001</b> | 1526 (48)                                                                   | 464 (13)  | <b>&lt;0.001</b> | 126 (40)                                                                | 37 (29) | 0.030              |
| <b>Fixed dose combination of ABs; J01R: J01RA*</b>           | 12 (0)                                                              | 929 (28)  | <b>&lt;0.001</b> | 31 (1)                                                          | 170 (20) | <b>&lt;0.001</b> | 34 (1)                                                                      | 669 (19)  | <b>&lt;0.001</b> | 6 (2)                                                                   | 17 (13) | <b>&lt;0.01</b>    |
| <b>Other ABs; J01X</b>                                       | 167 (6)                                                             | 176 (5)   | 0.145            | 132 (6)                                                         | 30 (4)   | 0.020            | 149 (5)                                                                     | 138 (4)   | 0.197            | 20 (6)                                                                  | 15 (12) | 0.056              |
| Glycopeptide ABs; J01XA                                      | 15 (1)                                                              | 176 (5)   | <b>&lt;0.001</b> | 0 (0)                                                           | 0 (0)    |                  | 0 (0)                                                                       | 0 (0)     |                  | 0 (0)                                                                   | 0 (0)   |                    |
| Imidazole derivatives; J01XD                                 | 152 (6)                                                             | 0 (0)     |                  | 132 (6)                                                         | 30 (4)   | 0.020            | 149 (5)                                                                     | 137 (4)   | 0.176            | 20 (6)                                                                  | 15 (12) | 0.056              |
| Other ABs; J01XX                                             | 0 (0)                                                               | 0 (0)     |                  | 0 (0)                                                           | 0 (0)    |                  | 0 (0)                                                                       | 1 (0)     |                  | 0 (0)                                                                   | 0 (0)   |                    |
| <b>Drugs for treatment of tuberculosis; J04A</b>             | 0 (0)                                                               | 0 (0)     |                  | 24 (1)                                                          | 0 (0)    |                  | 0                                                                           | 0 (0)     |                  | 0 (0)                                                                   | 0 (0)   |                    |
| Antibiotics; J04AB (Treatment for Tuberculosis)              | 0 (0)                                                               | 0 (0)     |                  | 6 (0)                                                           | 0 (0)    |                  | 0 (0)                                                                       | 0 (0)     |                  | 0 (0)                                                                   | 0 (0)   |                    |
| Hydrazides; J04AC                                            | 0 (0)                                                               | 0 (0)     |                  | 6 (0)                                                           | 0 (0)    |                  | 0 (0)                                                                       | 0 (0)     |                  | 0 (0)                                                                   | 0 (0)   |                    |
| Other drugs for treatment of tuberculosis; J04AK             | 0 (0)                                                               | 0 (0)     |                  | 12 (1)                                                          | 0 (0)    |                  | 0 (0)                                                                       | 0 (0)     |                  | 0 (0)                                                                   | 0 (0)   |                    |
| <b>Nitromidazole derivatives; P01AB (Oral Metronidazole)</b> | 201 (7)                                                             | 0 (0)     |                  | 81 (3)                                                          | 3 (0)    | <b>&lt;0.001</b> | 132 (4)                                                                     | 1 (0)     | <b>&lt;0.001</b> | 15 (5)                                                                  | 0 (0)   |                    |

Abbreviations: n(%): Number of patients (percentage in antibiotic class), AB: antibiotics, ATC: WHO anatomic therapeutic chemical classification, NTH: non-teaching hospital, TH: teaching hospital. Significant p-values shown in bold. Pearson chi-square and <sup>a</sup>Fischer's exact test were used to compare antibiotic prescribing details, generation.

1  
2  
3 Third-generation cephalosporins (J01DD) constituted 47% and 30% of the prescriptions in  
4 sub-group 3 and 4 at the NTH, followed by FDCs (19% and 29% of the prescriptions  
5 respectively). Overall, antibiotic prescriptions were significantly more common for the  
6 patients in sub-group 3 than in the sub-group 1' ( $p < 0.001$ ). The type of malaria was verified  
7 by blood samples reports in some cases of sub-group 3 (TH: 4% and NTH: 7%). None of the  
8 records from the four sub-groups had requisition for sending samples for bacterial culture and  
9 susceptibility test.  
10  
11  
12  
13  
14  
15  
16  
17  
18

19 Ciprofloxacin (J01MA02) was the most frequently prescribed antibiotic substance measured  
20 in DDD/1000 patients at the TH and ceftriaxone (J01DD04, Table 4) at the NTH. The highest  
21 number of prescribed DDDs/1000 patients was recorded for ciprofloxacin, followed by  
22 doxycycline and ceftriaxone in both hospitals (Figure 2).  
23  
24  
25  
26  
27  
28  
29  
30  
31  
32  
33  
34  
35  
36  
37  
38  
39  
40  
41  
42  
43  
44  
45  
46  
47  
48  
49  
50  
51  
52  
53  
54  
55  
56  
57  
58  
59  
60

**Table 4: Most commonly prescribed antibiotics among the selected diagnoses groups presenting the prescribing occasions in DDDs/1000 patients at sixth level of the ATC classification**

| Name; ATC-code                         | Group (a): Cardiovascular diseases                                           |            |                                                                          |                          | Group (b): Malaria or Viral fever                                                    |                          |                                                                                  |            |
|----------------------------------------|------------------------------------------------------------------------------|------------|--------------------------------------------------------------------------|--------------------------|--------------------------------------------------------------------------------------|--------------------------|----------------------------------------------------------------------------------|------------|
|                                        | Cardiovascular with no registered bacterial infection<br>(Sub-group 1) n (%) |            | Cardiovascular with suspected bacterial infection<br>(Sub-group 2) n (%) |                          | Malaria or Viral Fever with no registered bacterial infection<br>(Sub-group 3) n (%) |                          | Malaria or Viral Fever with suspected bacterial infection<br>(Sub-group 4) n (%) |            |
|                                        | TH                                                                           | NTH        | TH                                                                       | NTH                      | TH                                                                                   | NTH                      | TH                                                                               | NTH        |
| Total DDDs/1000 patients               | 2062 (99)                                                                    | 1456 (100) | 4514 (99)                                                                | 3421 (100 <sup>#</sup> ) | 4480 (100 <sup>#</sup> )                                                             | 3048 (100 <sup>#</sup> ) | 5432 (100 <sup>#</sup> )                                                         | 5827 (100) |
| Doxycycline, J01AA02                   | 491 (24)                                                                     |            | 1030 (23)                                                                |                          | 1463 (33)                                                                            | 296 (10)                 | 2745 (51)                                                                        |            |
| Ampicillin, J01CA01                    | 68 (3)                                                                       |            | 170 (4)                                                                  |                          |                                                                                      |                          |                                                                                  |            |
| Amoxicillin, J01CA04                   |                                                                              | 81 (6)     |                                                                          | 435 (13)                 |                                                                                      |                          |                                                                                  |            |
| Amoxicillin + Clavulanic acid, J01CR02 |                                                                              |            |                                                                          | 566 (17)                 |                                                                                      | 88 (3)                   |                                                                                  |            |
| Piperacillin + Tazobactam, J01CR05     |                                                                              |            |                                                                          |                          |                                                                                      | 34 (1)                   |                                                                                  |            |
| Ampicillin + Cloxacillin, J01CR50      | 217 (11)                                                                     |            | 774 (17)                                                                 |                          |                                                                                      |                          | 191 (4)                                                                          |            |
| Cefuroxime, J01DC02                    |                                                                              |            |                                                                          | 95 (3)                   |                                                                                      | 136 (4)                  |                                                                                  |            |
| Cefprozil, J01DC10                     |                                                                              | 75 (5)     |                                                                          |                          |                                                                                      |                          |                                                                                  |            |
| Cefotaxime, J01DD01                    | 172 (8)                                                                      | 46 (3)     | 298 (7)                                                                  | 59 (2)                   | 199 (4)                                                                              | 96 (3)                   | 295 (5)                                                                          |            |
| Ceftriaxone, J01DD04                   | 133 (6)                                                                      | 558 (38)   | 244 (5)                                                                  | 907 (27)                 | 560 (13)                                                                             | 1052 (35)                | 164 (3)                                                                          | 1402 (24)  |
| Azithromycin, J01FA10                  |                                                                              |            |                                                                          |                          |                                                                                      |                          |                                                                                  | 476 (8)    |
| Gentamicin, J01GB03                    | 44 (2)                                                                       |            | 167 (4)                                                                  | 81 (2)                   |                                                                                      |                          |                                                                                  |            |
| Amikacin, J01GB06                      |                                                                              |            |                                                                          |                          |                                                                                      |                          |                                                                                  | 321 (6)    |
| Ofloxacin, J01MA01                     |                                                                              |            |                                                                          |                          |                                                                                      | 202 (7)                  |                                                                                  |            |
| Ciprofloxacin, J01MA02                 | 687 (33)                                                                     | 141 (10)   | 1057 (23)                                                                | 527 (15)                 | 1940 (43)                                                                            | 602 (20)                 | 1185 (22)                                                                        | 2886 (50)  |
| Norfloxacin, J01MA06                   |                                                                              |            | 201 (4)                                                                  |                          |                                                                                      |                          | 273 (5)                                                                          |            |
| Levofloxacin, J01MA12                  |                                                                              | 73 (5)     | 202 (4)                                                                  | 129 (4)                  |                                                                                      |                          | 145 (3)                                                                          |            |
| Cefoperazone + Sulbactam, J01RA*83     |                                                                              | 92 (6)     |                                                                          | 94 (3)                   |                                                                                      | 90 (3)                   |                                                                                  | 125 (2)    |
| Ceftriaxone + Sulbactam, J01RA*84      |                                                                              | 228 (16)   |                                                                          | 277 (8)                  |                                                                                      | 199 (7)                  |                                                                                  |            |
| Ceftriaxone + Tazobactam, J01RA*85     |                                                                              | 162 (11)   |                                                                          | 156 (5)                  |                                                                                      | 162 (5)                  |                                                                                  | 250 (4)    |
| Metronidazole, J01XD01                 | 139 (7)                                                                      |            | 262 (6)                                                                  | 95 (3)                   | 204 (5)                                                                              | 91 (3)                   | 262 (5)                                                                          | 367 (6)    |
| Metronidazole, P01AB01 (Oral)          | 111 (5)                                                                      |            | 109 (2)                                                                  |                          | 114 (3)                                                                              |                          | 172 (3)                                                                          |            |

Abbreviations: n (%): Number of patients (percentage), AB: antibiotics, DDD: Defined Daily Dose, NTH: non-teaching hospital, TH: teaching hospital, <sup>#</sup> rounding off the percentages to nearest integer made the total more than 100%

1  
2  
3 **Figure 2. Top 90% of prescription in the four selected groups measured in DDD/1000 patients,**  
4 **presented at fourth level of the ATC classification at one teaching and one non-teaching**  
5 **hospitals in Ujjain, India**  
6

## 7 **DISCUSSION**

8  
9 To our knowledge this study is the first to investigate and present antibiotic prescription  
10 practices at medicine departments in Indian private sector hospitals by focusing on non-  
11 bacterial infectious diseases. This also leads to a limitation, as the results of the present study  
12 could not be compared with the findings of any other study. Thus the results of present study  
13 were compared with the most equivalent studies available globally.  
14  
15

16  
17  
18  
19  
20 Antibiotics were commonly prescribed to inpatients at both study hospitals. Irrespective of the  
21 indications, broad-spectrum antibiotics and third-generation cephalosporins that should be  
22 conserved for high risks co-morbidities and life-threatening bacterial infections were  
23 prescribed frequently. This study also highlights the high rates of antibiotic prescriptions used  
24 to treat the selected groups of non-bacterial infectious diseases such as cardiovascular disease,  
25 malaria, and viral fever.  
26  
27  
28  
29  
30  
31  
32

### 33 **Antibiotic prescriptions in the cardiovascular and fever groups**

34  
35  
36 The average percentage of patients that were prescribed antibiotics in the medicine  
37 departments were similar (TH: 65% and NTH: 67%,  $p < 0.001$ ) in comparison to the rates in  
38 the medicine department of a public hospital at Bathalapalli, Andhra Pradesh, India  
39 (63%),[26]. With a few exceptions, such as rheumatic fever, endocarditis, pericarditis and  
40 myocarditis (bacterial or viral), cardiovascular diseases are primarily non-infectious. COPD  
41 and RHD are the common associated diseases in cardiovascular patients. Rheumatic fever is  
42 an immune response sequel to an infection and it may cause endocarditis,[23,27]. However,  
43 pericarditis and myocarditis most commonly develop from viral pathogens where antibiotic  
44 treatment is not a routine recommendation,[28,29].  
45  
46  
47  
48  
49  
50  
51  
52  
53  
54  
55  
56  
57  
58  
59  
60

1  
2  
3 Interestingly, more than 35% of inpatients among the 'cardiovascular group with no registered  
4 bacterial infection' were prescribed antibiotics at both hospitals. As per treatment guidelines  
5 and recommendations, only patients who have confirmed infectious diagnosis are expected to  
6 receive an antibiotic prescription,[30–32]. Nonetheless, empirical or presumptive antibiotic  
7 therapy is also accepted when the clinical diagnosis, based on the presence of a strong clinical  
8 suspicion of bacterial infection, is substantiated by relevant medical history and clinical  
9 findings,[30]. According to the WHO and the Indian National Treatment Guidelines for  
10 Antimicrobial Use; presumptive therapy is typically a one-time treatment given for clinically  
11 presumed infection while waiting for the culture report,[31,32]. In combination of clinical  
12 findings laboratory and radiological reports are considered to confirm the diagnosis and lead  
13 to the definitive therapy,[32].  
14  
15  
16  
17  
18  
19  
20  
21  
22  
23  
24  
25  
26  
27  
28

29 Microbiology laboratories were highly under-utilized in both study hospitals. None of the  
30 patient records in the selected four sub-groups included notes about sending samples for  
31 culture and susceptibility testing. Therefore, the practice of prescribing antibiotics to the  
32 patient groups with no registered bacterial infection in absence of laboratory confirmation  
33 could not be considered to be rational. Among the COPD and RHD patients the aetiology of  
34 the current episode of hospitalization could potentially be expected to be non-bacterial (e.g.  
35 viral infection). However, this could not be confirmed due to the absence of laboratory  
36 investigations. It is worth mentioning here that prolonged empiric antibiotic treatment without  
37 a clear evidence of infection is one of the causes of the development of antibiotic resistance.  
38  
39  
40  
41  
42  
43  
44  
45  
46  
47  
48

49 More FDCs were prescribed to the cardiovascular patients at the NTH than at the TH.  
50 Rationality of the newer FDCs coded with ATC-code: J01RA\* has not been established yet  
51 and these combinations are not listed in either the NLEMI or the WHOLEM,[18,19]. It is also  
52  
53  
54  
55  
56  
57  
58  
59  
60

1  
2  
3 evident that the constituents of these combinations are often present in lower quantities than is  
4  
5 recommended which might lead to the development of antibiotic resistance,[33].  
6  
7

8 The sub-group 'malaria or viral fever with suspected bacterial infection' was found to have the  
9  
10 highest rate of antibiotic prescriptions among all the four sub-groups (TH: 96%, NTH: 75%).  
11  
12 Our result also highlight that patients with fever were more likely to receive antibiotic  
13  
14 prescriptions, than patients with cardiovascular diseases. Fever is a common symptom among  
15  
16 malaria, viral fever and bacterial infection. Therefore, the doctors might have prescribed  
17  
18 antibiotics as a 'prophylactic' treatment to treat bacterial infection, if any. In our study the rate  
19  
20 of antibiotic prescriptions for the patients with fever was higher than, yet comparable with a  
21  
22 study at primary and secondary health care settings in Uttar Pradesh, India where 85% of the  
23  
24 fever patients were prescribed antibiotics,[34]. Additionally, in our study a high percentage of  
25  
26 patients with fever (malaria or viral fever) with 'no registered bacterial infection' were  
27  
28 prescribed antibiotics (TH: 82%, NTH: 71%). An out-patient study from Uganda, a malaria  
29  
30 endemic country, showed that 42% of malaria patients were prescribed antibiotics without  
31  
32 any registered indication,[25]. As the majority of the prescriptions in our study were  
33  
34 empirical, the rationale for using the antibiotics cannot be evaluated. However, prescribing  
35  
36 antibiotics to treat non-bacterial infections is considered to be an irrational practice. Thus it is  
37  
38 imperative that this matter be addressed.  
39  
40  
41  
42  
43

#### 44 **Adherence to the essential medicine lists and prescriptions by generic name**

45  
46 A higher proportion of prescribed antibiotics at the TH (77%) were from the NLEMI  
47  
48 compared with the NTH (60%,  $p < 0.001$ ). This could be attributed to the presence of a  
49  
50 management policy to purchase and supply medicines at the TH. However, there is a need to  
51  
52 improve adherence to the NLEMI at both hospitals. According to WHO, prescribing by their  
53  
54 generic name is; part of rational prescribing, cost effective and provides flexibility to buy the  
55  
56  
57  
58  
59  
60

1  
2  
3 available medicine of any company. This policy is equally applicable for both public and  
4  
5 private healthcare settings. However, adherence to this policy is higher at public hospitals,  
6  
7 followed by 'private non-profit' hospitals and by the 'private for-profit' hospitals,[13,14,35]. In  
8  
9 the present study, significantly lower antibiotic prescriptions were made by generic names to  
10  
11 the patients of sub-group 1 (TH: 6%, NTH: 1%  $p<0.001$ ) or sub-group 2 (TH: 12% NTH: 5%  
12  
13  $p<0.001$ ) at the NTH than at the TH. Third-generation cephalosporins (J01D, 29%) and FDCs  
14  
15 (J01RA\*, 23%) were the most commonly prescribed classes of antibiotics at the NTH while  
16  
17 quinolones were most commonly prescribed at the TH (J01M, 37%, NTH: 13%). Previous  
18  
19 studies from Uttar Pradesh, India and Madhya Pradesh, India have also shown similar results  
20  
21 for academic and non-academic hospitals,[13,14,17]. The high incidence of prescribing these  
22  
23 classes is further supported by Van Boeckel et al, who observed a significant increase in the  
24  
25 consumption of fluoroquinolones and cephalosporins globally over the past decade. This  
26  
27 increase was mainly attributed to the increased rates in India and China,[9]. At the NTH,  
28  
29 prescriptions of FDCs varied between 19% and 28% among the selected sub-groups (TH:  
30  
31  $<2\%$ ) and the prescriptions of third-generation cephalosporins varied between 30% and 47%  
32  
33 (TH:  $<22\%$ ). According to WHO, prescribing multiple antibiotics when not indicated, often  
34  
35 combined in inadequate doses (smaller or larger quantity than recommended) and prescription  
36  
37 of drugs other than local or national guidelines are all examples of actions deemed  
38  
39 inappropriate,[36]. All these practices could be seen in prescribing newer FDCs (J01RA\*);  
40  
41 both of the study hospitals are from the private sector and are regulated by the same trust on a  
42  
43 'not for-profit' basis. The differences in the prescribing practices might be due to each  
44  
45 hospital's policy and the fact that academic hospitals are part of the educational process, and  
46  
47 regular educational activities conducted at these hospitals results in better adherence to the  
48  
49 guidelines, as seen at the TH. Another reason for the frequent prescribing of broad-spectrum  
50  
51 antibiotics, new FDCs and use of trade names at the NTH could be explained by the results of  
52  
53  
54  
55  
56  
57  
58  
59  
60



1  
2  
3 a review conducted by Blumenthal et al,[37]. That review concluded that physicians who had  
4 received gifts or money from pharmaceutical companies were more likely to prescribe drugs  
5 produced by the brand names and less prone to use the generic names. The pressure from  
6 pharmaceutical companies could be anticipated on the doctors at the NTH, due to unrestricted  
7 visits from pharmaceutical company representatives,[37]. Moreover, these new FDCs of  
8 antibiotics are more expensive than the regular and generic formulations,[13,14,37]. The  
9 restriction of these visits and the management control over the purchase and supply of  
10 medicines can be seen as main reasons for low incidence of prescribing FDCs prescribing and  
11 high use of generic names at the TH.  
12  
13

14 Interestingly trade names were used as local abbreviations to prescribe four most commonly  
15 prescribed antibiotics; ciprofloxacin, doxycycline, gentamycin and metronidazole at the TH,  
16 as discussed in result section. However, only generic drugs were purchased and dispensed at  
17 the TH due to administrative control over the purchase and supply of the drugs. Thus even if  
18 these antibiotics were prescribed using an abbreviation similar to the trade name, they were  
19 included in adherence to the generic name prescribing category.  
20  
21

### 22 **Duration of hospital stay and duration of antibiotic treatment**

23  
24 In the present study both the duration of hospital stay and the duration of antibiotic treatment  
25 were longer at the TH than the NTH among all inpatients groups. This could be due to the fact  
26 that the patients at the TH received free healthcare services and drugs, making their stay  
27 economically feasible. In contrast, at the NTH the patients had to pay for all the services and  
28 drugs they received. This association of longer duration of stay and antibiotic treatment at TH  
29 has also been observed in previous studies from India,[13,14,17]. However, it is evident that  
30 the treatment given for a time period that is either shorter or longer than recommended, is  
31  
32  
33  
34  
35  
36  
37  
38  
39  
40  
41  
42  
43  
44  
45  
46  
47  
48  
49  
50  
51  
52  
53  
54  
55  
56  
57  
58  
59  
60

1  
2  
3 inappropriate and it substantially contributes to the development of antibiotic  
4  
5 resistance,[1,36].  
6

7  
8 Absence of computerized record systems in hospitals, absence of personal identification  
9  
10 number, untrained staff and high staff turnover makes a detailed study like this, time  
11  
12 consuming and onerous exercise and delays the analysis. We are aware that extensive manual  
13  
14 checking and working with the data like adding the ICD codes and the ATCs for the new  
15  
16 FDCs to the data has prolonged the analysis process and has delayed the presentation.  
17  
18 However, use of man power is the only option to conduct such detailed studies at resource  
19  
20 constrained settings but at the same time lead to relatively more accurate description of the  
21  
22 prescribing patterns.  
23  
24  
25  
26  
27

## 28 **STRENGTHS AND LIMITATIONS**

29  
30  
31 A high number of patients were screened over a three year period this overcomes seasonal  
32  
33 variations in infectious aetiology which would affect antibiotic prescribing. Same form was  
34  
35 used for the data collection and the process was supervised and monitored by same person at  
36  
37 both hospitals to improve the reliability of the data. The diagnoses were not verified  
38  
39 externally being a limitation of the study. However, external verification is virtually  
40  
41 inapplicable to studies that rely upon the routine collection of data. The results of the study  
42  
43 were based on the notes included in the patient files. Extensive efforts were made to  
44  
45 document all notes including diagnoses written in the patient files. However, the possibility of  
46  
47 missing a few diagnoses and losing some data during the transition from the forms to the  
48  
49 digital storage cannot be excluded.  
50  
51  
52

## 53 **CONCLUSION**

54  
55  
56 A higher number of prescribing occasions were recorded at the TH, and not at the NTH, with  
57  
58  
59  
60

1  
2  
3 regard to adherence to the guidelines. However, overall adherence was low. Fever was a risk  
4  
5 factor to receive antibiotic prescription at both hospitals. Patients with non-bacterial infections  
6  
7 such as malaria or viral fever or with cardiovascular diseases were prescribed antibiotics at  
8  
9 both medicine departments which could not be justified. Broad spectrum antibiotics with  
10  
11 irrational combinations of antibiotics were commonly prescribed in the study hospitals for  
12  
13 non-indicated conditions. A large proportion of patients were categorised as suspected  
14  
15 bacterial diagnoses (sub-groups 2 and 4). In the presence of confirmed aetiology, according to  
16  
17 microbiology reports, some of these could have been categorised in non-bacterial group and  
18  
19 could have contributed to higher antibiotic prescribing rates in the non-bacterial diagnoses  
20  
21 (sub-groups 1 and 3). However, this was unavoidable due to absence of confirmed aetiology  
22  
23 and the nature of the study design (observational).  
24  
25  
26  
27

## 28 **GENERALISABILITY AND FUTURE IMPLICATIONS**

29  
30  
31 The data collection method used in the study is robust and reliable. In accordance with one of  
32  
33 the WHO goals of "Global-action-plan" and in view of limited knowledge of antibiotic  
34  
35 utilization and resistance patterns our study findings suggest that there is a need to conduct  
36  
37 and share similar long term surveillance studies globally. The data collection method and  
38  
39 tested tool used in the study could easily be adapted in other settings that lack computerized  
40  
41 patient records. The management in the TH had a policy to control the purchase and supply of  
42  
43 medicines. This control shows positive effects at the TH compared to the NTH; to minimise  
44  
45 antibiotic prescribing, in better adherence to the NLEMI and in use of generic names. This  
46  
47 control could be implemented and tested in other constrained settings. The recruitment of  
48  
49 nursing staff for manual data collection who routinely work in the department would have  
50  
51 helped to minimize the influence on the prescribers. High prescribing rates of antibiotics and  
52  
53 use of FDCs among inpatients in these settings could broadly be considered as representative  
54  
55 for similar health care settings in low-middle income countries. Lack of culture of sending  
56  
57  
58  
59  
60

1  
2  
3 cultures is another important issue raised by the study. The need to develop and implement  
4  
5 local diagnosis specific prescribing guidelines in conjugation with continuous follow-up is  
6  
7 also emphasized by our study. The physicians should be motivated to send samples for  
8  
9 cultures before prescribing antibiotics. Improving hygiene practices is another  
10  
11 recommendation to prevent spread of infection and to decrease in the 'prophylactic' use of  
12  
13 antibiotics.  
14

### 15 16 17 **CONTRIBUTERSHIP STATEMENT**

18  
19 MS and CSL designed, visualized the research question and developed the data collection  
20  
21 tool. MS conducted repeated training sessions for nursing personal for recording the data. MS  
22  
23 was also responsible for coordination with the nursing staff, monitoring and supervision of the  
24  
25 data collection and entry. CSL participated in planning the study design and the coordination  
26  
27 of the study. KL, CSL and MS participated in the conception and design of the present study  
28  
29 and revising the paper critically for substantial intellectual content. KL grouped and analyzed  
30  
31 the data, performed the statistical analysis and contributed in drafting the manuscript along  
32  
33 with MS, CSL, FJ and AS. KL, AS and MS were responsible for categorization of the  
34  
35 patients. All authors read and approved the final version of the manuscript.  
36  
37  
38  
39

### 40 **COMPETING INTERESTS**

41  
42  
43 The authors have no competing interests to declare.  
44  
45

### 46 **FUNDING**

47  
48 This study was supported by the Swedish Research Council (K2007-70X-20514-01-3) and  
49  
50 Asia Link (348-2006-6633). KL and FJ both received scholarships from Sida to visit the study  
51  
52 settings and perform the study. MS is a recipient of a scholarship from Erasmus Mundus  
53  
54 External Cooperation Window Lot-15, India.  
55  
56  
57  
58  
59  
60

## ACKNOWLEDGEMENT

The authors are thankful to all nurses and the management of both hospitals for their support and help during the study.

## DATA SHARING STATEMENT

As per the institutional policy, the data is available with the Institutional ethics committee. This is to protect the patient's confidentiality and to ensure the electronic security of the data. The data could be made available to all interested researchers upon request made to; The Chairman, Ethics Committee, R.D. Gardi Medical College, Agar Road, Ujjain, Madhya Pradesh, India 456006 (Email: [iecrdgmcc@yahoo.in](mailto:iecrdgmcc@yahoo.in), [uctharc@sancharnet.in](mailto:uctharc@sancharnet.in)), giving all details of the article. The ethical approval number: 41/2007 needs to be quoted along with the request.

## REFERENCES

1. World Health Organization. The evolving threat of antimicrobial resistance: Options for action. WHO Publications. Geneva; 2014; [http://whqlibdoc.who.int/publications/2012/9789241503181\\_eng.pdf](http://whqlibdoc.who.int/publications/2012/9789241503181_eng.pdf)(accessed 2016 Sep 15)
2. World Health Organization. The top 10 causes of death. Geneva; 2014; <http://www.who.int/mediacentre/factsheets/fs310/en/>(accessed 2016 Sep 15)
3. Global Antibiotic Resistance Partnership (GARP) India Working Group. Rationalizing antibiotic use to limit antibiotic resistance in India. *Indian J Med Res.* 2011.134:281–94.
4. Bhutta Z a, Sommerfeld J, Lassi ZS, et al. Global burden, distribution, and interventions for infectious diseases of poverty. *Infect Dis poverty.* 2014.3(1):21.
5. Global Antibiotic Resistance Partnership (GARP) India Working Group. Antibiotic Use and Resistance in India. New Dehli; 2011; [http://www.cddep.org/publications?page=1&f\[0\]=field\\_region:13](http://www.cddep.org/publications?page=1&f[0]=field_region:13)(accessed 2016 Sep 15)

- 1  
2  
3 6. World Health Organization. Disease and injury country estimates: Burden of disease.  
4 Geneva;  
5 [http://www.who.int/healthinfo/global\\_burden\\_disease/estimates\\_country/en/index.html](http://www.who.int/healthinfo/global_burden_disease/estimates_country/en/index.html)  
6 (accessed 2016 Sep 16)  
7
- 8  
9 7. Kumar SG, Adithan C, Harish BN, et al. Antimicrobial resistance in India: A review. *J*  
10 *Nat Sci Biol Med.* 2013.4(2):286–91.
- 11  
12 8. Wilcox MH, Freeman J, Fawley W, et al. Long-term surveillance of cefotaxime and  
13 piperacillin – tazobactam prescribing and incidence of *Clostridium difficile* diarrhoea.  
14 *J Antimicrob Chemother.* 2004.54(1):168–72.
- 15  
16 9. Van Boeckel TP, Gandra S, Ashok A, et al. Global antibiotic consumption 2000 to  
17 2010: An analysis of national pharmaceutical sales data. *Lancet Infect Dis.*  
18 2014.14(April):742–50.
- 19  
20 10. The World Bank. World development indicators, GNI per capita, Atlas method. 2015;  
21 <http://data.worldbank.org/indicator/NY.GNP.PCAP.CD>(accessed 2016 Sep 15)  
22
- 23  
24 11. De Costa A, Diwan V. “Where is the public health sector?”. Public and private sector  
25 healthcare provision in Madhya Pradesh, India. *Health Policy (New York).*  
26 2007.84:269–76.
- 27  
28 12. Sekher T V. Catastrophic Health Expenditure and Poor in India : Health Insurance is  
29 the Answer ? Vol. 494, SAGE-India. 2011; p. 1–4.  
30 <http://iussp.org/en/event/17/programme/paper/4043>  
31
- 32  
33 13. Sharma M, Damlin AL, Sharma A, et al. Antibiotic prescribing in medical intensive  
34 care units – a comparison between two private sector hospitals in Central India. *Infect*  
35 *Dis (Auckl).* Elsevier Ltd; 2015.14(8):1–8.
- 36  
37 14. Sharma M, Damlin A, Pathak A, et al. Antibiotic Prescribing among Pediatric  
38 Inpatients with Potential Infections in Two Private Sector Hospitals in Central India.  
39 *PLoS One.* 2015.10.  
40 <http://journals.plos.org/plosone/article?id=10.1371/journal.pone.0142317>  
41
- 42  
43 15. WHO Int WG for Drug Statistics Methodology. Introduction to Drug Utilization  
44 Research. Oslo; 2003; p. 1–48.  
45 [http://www.whocc.no/filearchive/publications/drug\\_utilization\\_research.pdf](http://www.whocc.no/filearchive/publications/drug_utilization_research.pdf)(accessed  
46 2016 Sep 16)  
47
- 48  
49 16. WHOCC. ATC/DDD Index. 2015; [http://www.whocc.no/atc\\_ddd\\_index/](http://www.whocc.no/atc_ddd_index/)(accessed  
50 2015 Mar 13)
- 51  
52 17. Sharma M, Eriksson B, Marrone G, et al. Antibiotic prescribing in two private sector  
53 hospitals; one teaching and one non-teaching: A cross-sectional study in Ujjain, India.  
54 *BMC Infect Dis.* 2012.12:155.  
55  
56  
57  
58  
59  
60

18. Organization CDSC. National List of Essential Medicines. New Dehli; 2011; <http://apps.who.int/medicinedocs/documents/s18693en/s18693en.pdf>(accessed 2016 Sep 16)
19. World Health Organization. Model List of Essential Medicines. Geneva; 2013; p. 1–43. [http://www.who.int/medicines/publications/essentialmedicines/18th\\_EML\\_Final\\_web\\_8Jul13.pdf](http://www.who.int/medicines/publications/essentialmedicines/18th_EML_Final_web_8Jul13.pdf)(accessed 2016 Sep 16)
20. World Health Organization. The international statistical classification of diseases and health related problems, ICD-10. Malta: World Health Organization; 2012;
21. World Health Organization. International Statistical Classification of Diseases and Related Health Problems 10th Revision (ICD-10) Version for 2010. <http://apps.who.int/classifications/icd10/browse/2010/en>
22. Enzler MJ, Berbari E, Osmon DR. Antimicrobial prophylaxis in adults. *Mayo Clin Proc.* 2011.86(1):686–701. <http://dx.doi.org/10.4065/mcp.2011.0012>
23. Bisno A, Butchart EG, Ganguly NK, et al. Rheumatic Fever and Rheumatic Heart Disease. *Who Tech Rep Ser.* 2001.923(November 2001):1–122.
24. World Health Organization. Guidelines for the treatment of malaria, 2nd edition. Geneva; 2010; p. 197p. [http://whqlibdoc.who.int/publications/2010/9789241547925\\_eng.pdf](http://whqlibdoc.who.int/publications/2010/9789241547925_eng.pdf)(accessed 2015 Mar 13)
25. Means AR, Weaver MR, Burnett SM, et al. Correlates of inappropriate prescribing of antibiotics to patients with malaria in Uganda. *PLoS One.* 2014.9(2):1–7.
26. Alvarez-uria G, Zachariah S, Thomas D. High prescription of antimicrobials in a rural district hospital in India. *Pharm Pr.* 2014.12(2):1–4.
27. Habib G, Hoen B, Tornos P, et al. Guidelines on the prevention, diagnosis, and treatment of infective endocarditis. *Eur Heart J.* 2009.30:2369–413.
28. Maisch B, Seferović PM, Ristić AD, et al. Guidelines on the Diagnosis and Management of Pericardial Diseases: Executive Summary. Vol. 25, *European Heart Journal.* 2004; p. 587–610.
29. Schultheiss HP, Khl U, Cooper LT. The management of myocarditis. *Eur Heart J.* 2011.32:2616–25.
30. National centre for disease Control India. India National Treatment Guidelines for Antimicrobial Use in Infectious Diseases. Vol. 0. New Dehli; 2016; p. 1–64. [http://www.ncdc.gov.in/writereaddata/linkimages/AMR\\_guideline7001495889.pdf](http://www.ncdc.gov.in/writereaddata/linkimages/AMR_guideline7001495889.pdf)
31. Bennet JE, Dolin R, Blaser MJ. Madell, Douglas and Bennet’s Principles and Practice of Infectious Diseases. 8th ed. Philadelphia: Saunders; 2014;

- 1  
2  
3 32. Davey P, Wilcox M, Irwing W, et al. Antimicrobial Chemotherapy. 7th ed. Oxford:  
4 Oxford University Press; 2015;  
5  
6 33. Tripathi K. Essentials of Medical Pharmacology. Antimicrobial Drugs. 6th edition. 6th  
7 ed. New Dehli: Jaypee Brothers Medical Publishers; 2012;  
8  
9 34. Kumar R, Indira K, Rizvi a., et al. Antibiotic prescribing practices in primary and  
10 secondary health care facilities in Uttar Pradesh, India. *J Clin Pharm Ther.*  
11 2008.33:625–34.  
12  
13 35. Pitaknetinan K, Tangcharoensathien V, Supachutikul a, et al. Profit, payment and  
14 pharmaceutical practices: perspectives from hospitals in Bangkok. *Health Policy.*  
15 1999.46:179–94. <http://www.ncbi.nlm.nih.gov/pubmed/10351667>  
16  
17 36. Who. Promoting rational use of medicines: core components. *WHO Policy Perspect*  
18 *Med.* 2002.:1–6. <http://apps.who.int/medicinedocs/pdf/h3011e/h3011e.pdf>  
19  
20 37. Blumenthal D. Doctors and Drug Companies. *N Engl J Med.* 2004.351:1885–7.  
21  
22  
23  
24  
25  
26  
27  
28  
29  
30  
31  
32  
33  
34  
35  
36  
37  
38  
39  
40  
41  
42  
43  
44  
45  
46  
47  
48  
49  
50  
51  
52  
53  
54  
55  
56  
57  
58  
59  
60



1  
2  
3 **Figure 1. The process of selection and grouping of inpatients admitted in medicine departments**  
4 **of the TH and the NTH based on their diagnosis.**  
5  
6  
7

8 **Figure 2. Top 90% of prescription in the four selected groups measured in DDD/1000 patients,**  
9 **presented at fourth level of the ATC classification at one teaching and one non-teaching**  
10 **hospitals in Ujjain, India**  
11  
12  
13  
14  
15  
16  
17  
18  
19  
20  
21  
22  
23  
24  
25  
26  
27  
28  
29  
30  
31  
32  
33  
34  
35  
36  
37  
38  
39  
40  
41  
42  
43  
44  
45  
46  
47  
48  
49  
50  
51  
52  
53  
54  
55  
56  
57  
58  
59  
60

For peer review only

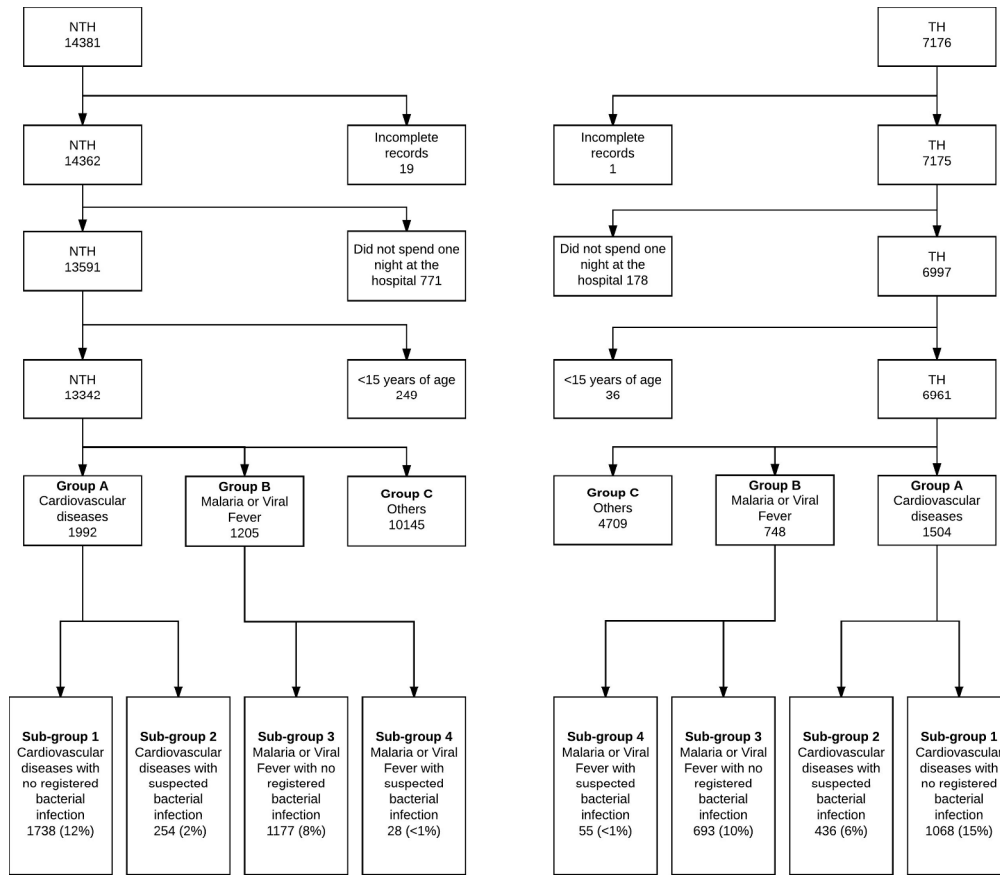

The process of selection and grouping of inpatients admitted in medicine departments of the TH and the NTH based on their diagnosis

674x590mm (96 x 96 DPI)

only

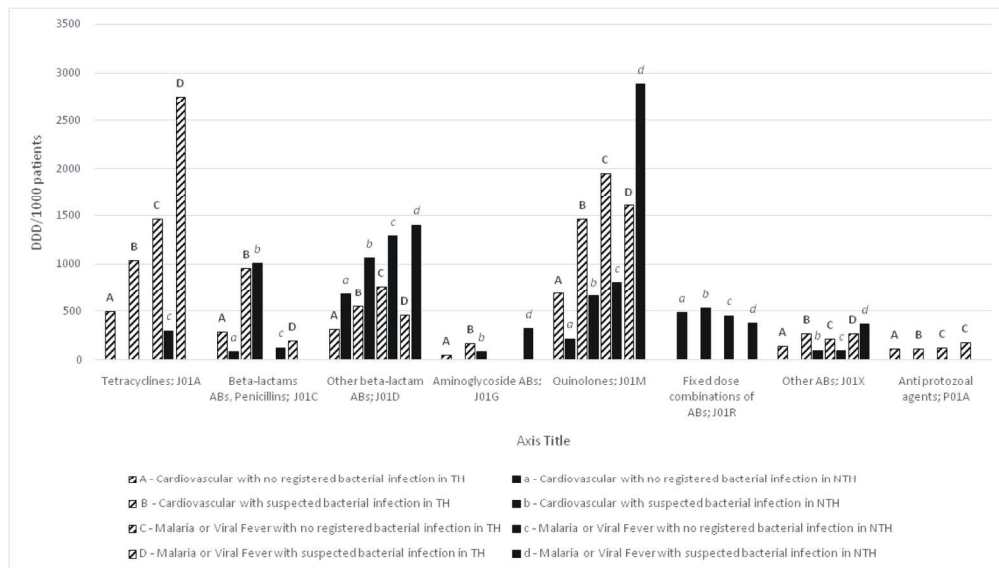

Top 90% of prescription in the four selected groups measured in DDD/1000 patients, presented at fourth level of the ATC classification at one teaching and one non-teaching hospitals in Ujjain, India

91x51mm (600 x 600 DPI)

Review only

## STROBE Statement—checklist of items that should be included in reports of observational studies

|                           | Item No | Recommendation                                                                                                                                                                                                                                                                                                                                                                                                                                                         | Page number |
|---------------------------|---------|------------------------------------------------------------------------------------------------------------------------------------------------------------------------------------------------------------------------------------------------------------------------------------------------------------------------------------------------------------------------------------------------------------------------------------------------------------------------|-------------|
| <b>Title and abstract</b> | 1       | (a) Indicate the study's design with a commonly used term in the title or the abstract                                                                                                                                                                                                                                                                                                                                                                                 | 1           |
|                           |         | (b) Provide in the abstract an informative and balanced summary of what was done and what was found                                                                                                                                                                                                                                                                                                                                                                    | 2-3         |
| <b>Introduction</b>       |         |                                                                                                                                                                                                                                                                                                                                                                                                                                                                        |             |
| Background/rationale      | 2       | Explain the scientific background and rationale for the investigation being reported                                                                                                                                                                                                                                                                                                                                                                                   | 5           |
| Objectives                | 3       | State specific objectives, including any pre specified hypotheses                                                                                                                                                                                                                                                                                                                                                                                                      | 6           |
| <b>Methods</b>            |         |                                                                                                                                                                                                                                                                                                                                                                                                                                                                        |             |
| Study design              | 4       | Present key elements of study design early in the paper                                                                                                                                                                                                                                                                                                                                                                                                                | 6           |
| Setting                   | 5       | Describe the setting, locations, and relevant dates, including periods of recruitment, exposure, follow-up, and data collection                                                                                                                                                                                                                                                                                                                                        | 6           |
| Participants              | 6       | (a) <i>Cohort study</i> —Give the eligibility criteria, and the sources and methods of selection of participants. Describe methods of follow-up<br><i>Case-control study</i> —Give the eligibility criteria, and the sources and methods of case ascertainment and control selection. Give the rationale for the choice of cases and controls<br><i>Cross-sectional study</i> —Give the eligibility criteria, and the sources and methods of selection of participants | 7           |
|                           |         | (b) <i>Cohort study</i> —For matched studies, give matching criteria and number of exposed and unexposed<br><i>Case-control study</i> —For matched studies, give matching criteria and the number of controls per case                                                                                                                                                                                                                                                 |             |
| Variables                 | 7       | Clearly define all outcomes, exposures, predictors, potential confounders, and effect modifiers. Give diagnostic criteria, if applicable                                                                                                                                                                                                                                                                                                                               | 7           |
| Data sources/ measurement | 8*      | For each variable of interest, give sources of data and details of methods of assessment (measurement). Describe comparability of assessment methods if there is more than one group                                                                                                                                                                                                                                                                                   | 8           |
| Bias                      | 9       | Describe any efforts to address potential sources of bias                                                                                                                                                                                                                                                                                                                                                                                                              | 9-10        |
| Study size                | 10      | Explain how the study size was arrived at                                                                                                                                                                                                                                                                                                                                                                                                                              | 8           |

|    |                        |    |                                                                          |             |
|----|------------------------|----|--------------------------------------------------------------------------|-------------|
| 1  | Quantitative variables | 11 | Explain how quantitative variables were handled in the analyses.         | <b>8-10</b> |
| 2  |                        |    | If applicable, describe which groupings were chosen and why              |             |
| 3  |                        |    |                                                                          |             |
| 4  |                        |    |                                                                          |             |
| 5  | Statistical methods    | 12 | (a) Describe all statistical methods, including those used to            |             |
| 6  |                        |    | control for confounding                                                  |             |
| 7  |                        |    |                                                                          |             |
| 8  |                        |    | (b) Describe any methods used to examine subgroups and                   |             |
| 9  |                        |    | interactions                                                             |             |
| 10 |                        |    |                                                                          |             |
| 11 |                        |    | (c) Explain how missing data were addressed                              |             |
| 12 |                        |    |                                                                          |             |
| 13 |                        |    | (d) <i>Cohort study</i> —If applicable, explain how loss to follow-up    | <b>10</b>   |
| 14 |                        |    | was addressed                                                            |             |
| 15 |                        |    |                                                                          |             |
| 16 |                        |    | <i>Case-control study</i> —If applicable, explain how matching of cases  |             |
| 17 |                        |    | and controls was addressed                                               |             |
| 18 |                        |    |                                                                          |             |
| 19 |                        |    | <i>Cross-sectional study</i> —If applicable, describe analytical methods |             |
| 20 |                        |    | taking account of sampling strategy                                      |             |
| 21 |                        |    |                                                                          |             |
| 22 |                        |    | (e) Describe any sensitivity analyses                                    |             |
| 23 |                        |    |                                                                          |             |
| 24 |                        |    |                                                                          |             |
| 25 |                        |    |                                                                          |             |
| 26 |                        |    |                                                                          |             |
| 27 |                        |    |                                                                          |             |
| 28 |                        |    |                                                                          |             |
| 29 |                        |    |                                                                          |             |
| 30 |                        |    |                                                                          |             |
| 31 |                        |    |                                                                          |             |
| 32 |                        |    |                                                                          |             |
| 33 |                        |    |                                                                          |             |
| 34 |                        |    |                                                                          |             |
| 35 | Continued on next page |    |                                                                          |             |
| 36 |                        |    |                                                                          |             |
| 37 |                        |    |                                                                          |             |
| 38 |                        |    |                                                                          |             |
| 39 |                        |    |                                                                          |             |
| 40 |                        |    |                                                                          |             |
| 41 |                        |    |                                                                          |             |
| 42 |                        |    |                                                                          |             |
| 43 |                        |    |                                                                          |             |
| 44 |                        |    |                                                                          |             |
| 45 |                        |    |                                                                          |             |
| 46 |                        |    |                                                                          |             |
| 47 |                        |    |                                                                          |             |
| 48 |                        |    |                                                                          |             |
| 49 |                        |    |                                                                          |             |
| 50 |                        |    |                                                                          |             |
| 51 |                        |    |                                                                          |             |
| 52 |                        |    |                                                                          |             |
| 53 |                        |    |                                                                          |             |
| 54 |                        |    |                                                                          |             |
| 55 |                        |    |                                                                          |             |
| 56 |                        |    |                                                                          |             |
| 57 |                        |    |                                                                          |             |
| 58 |                        |    |                                                                          |             |
| 59 |                        |    |                                                                          |             |
| 60 |                        |    |                                                                          |             |

Continued on next page

| <b>Results</b>           |     | <b>Page Number</b>                                                                                                                                                                                                                                                                                                                                                                                            |                                                            |
|--------------------------|-----|---------------------------------------------------------------------------------------------------------------------------------------------------------------------------------------------------------------------------------------------------------------------------------------------------------------------------------------------------------------------------------------------------------------|------------------------------------------------------------|
| Participants             | 13* | (a) Report numbers of individuals at each stage of study—eg numbers potentially eligible, examined for eligibility, confirmed eligible, included in the study, completing follow-up, and analysed                                                                                                                                                                                                             | <b>9,10</b>                                                |
|                          |     | (b) Give reasons for non-participation at each stage                                                                                                                                                                                                                                                                                                                                                          |                                                            |
|                          |     | (c) Consider use of a flow diagram                                                                                                                                                                                                                                                                                                                                                                            |                                                            |
| Descriptive data         | 14* | (a) Give characteristics of study participants (eg demographic, clinical, social) and information on exposures and potential confounders                                                                                                                                                                                                                                                                      | <b>09-11</b><br><b>Table 1</b>                             |
|                          |     | (b) Indicate number of participants with missing data for each variable of interest                                                                                                                                                                                                                                                                                                                           |                                                            |
|                          |     | (c) <i>Cohort study</i> —Summarise follow-up time (eg, average and total amount)                                                                                                                                                                                                                                                                                                                              |                                                            |
| Outcome data             | 15* | <i>Cohort study</i> —Report numbers of outcome events or summary measures over time                                                                                                                                                                                                                                                                                                                           | <b>10-11, 14-15</b><br><b>Table 2</b>                      |
|                          |     | <i>Case-control study</i> —Report numbers in each exposure category, or summary measures of exposure                                                                                                                                                                                                                                                                                                          |                                                            |
|                          |     | <i>Cross-sectional study</i> —Report numbers of outcome events or summary measures                                                                                                                                                                                                                                                                                                                            |                                                            |
| Main results             | 16  | (a) Give unadjusted estimates and, if applicable, confounder-adjusted estimates and their precision (eg, 95% confidence interval). Make clear which confounders were adjusted for and why they were included<br>(b) Report category boundaries when continuous variables were categorized<br>(c) If relevant, consider translating estimates of relative risk into absolute risk for a meaningful time period | <b>11-17</b><br><b>Table 2, 3 and 4</b><br><b>Figure 2</b> |
| Other analyses           | 17  | Report other analyses done—eg analyses of subgroups and interactions, and sensitivity analyses                                                                                                                                                                                                                                                                                                                |                                                            |
| <b>Discussion</b>        |     |                                                                                                                                                                                                                                                                                                                                                                                                               |                                                            |
| Key results              | 18  | Summarise key results with reference to study objectives                                                                                                                                                                                                                                                                                                                                                      | <b>18</b>                                                  |
| Limitations              | 19  | Discuss limitations of the study, taking into account sources of potential bias or imprecision. Discuss both direction and magnitude of any potential bias                                                                                                                                                                                                                                                    | <b>23</b>                                                  |
| Interpretation           | 20  | Give a cautious overall interpretation of results considering objectives, limitations, multiplicity of analyses, results from similar studies, and other relevant evidence                                                                                                                                                                                                                                    | <b>18-22</b>                                               |
| Generalisability         | 21  | Discuss the generalisability (external validity) of the study results                                                                                                                                                                                                                                                                                                                                         | <b>24</b>                                                  |
| <b>Other information</b> |     |                                                                                                                                                                                                                                                                                                                                                                                                               |                                                            |
| Funding                  | 22  | Give the source of funding and the role of the funders for the present study and, if applicable, for the original study on which the present article is based                                                                                                                                                                                                                                                 | <b>25</b>                                                  |

\*Give information separately for cases and controls in case-control studies and, if applicable, for exposed and unexposed groups in cohort and cross-sectional studies.
